# Supplementary material for: The Transcriptional and Protein Profile From Human Infected Neuroprogenitor Cells Is Strongly Correlated to Zika Virus Microcephaly Cytokines Phenotype Evidencing a Persistent Inflammation in the CNS
Source: Front Immunol. 2019 Aug 16;10:1928. doi: 10.3389/fimmu.2019.01928 (PMC6707094; doi:10.3389/fimmu.2019.01928)
Supplement: Supplementary file 3 [file Data_Sheet_3.xlsx]

## Sheet: FSS13025-vs-Control
ID	baseMean	log2FoldChange	lfcSE	stat	pvalue	padj	Description	Symbol	Gene_length	chr
ENSG00000228794	214.259428542488	-0.280962310768279	0.120805653103965	-2.3257381053723	0.0200325263449248	0.0387079927511964	long intergenic non-protein coding RNA 1128	LINC01128	31856	chr1
ENSG00000225880	12.6840377070113	-0.112245988989409	0.322253530337208	-0.348315777555498	0.727603046095921	0.792077781622493	long intergenic non-protein coding RNA 115	LINC00115	1317	chr1
ENSG00000187634	15.6717983301382	0.152853602083406	0.306305131524399	0.499023967775841	0.617762499273524	0.700264168541134	sterile alpha motif domain containing 11	SAMD11	18232	chr1
ENSG00000188976	2649.88731602741	0.158543467195126	0.0734633161328273	2.15813109917973	0.0309176404481752	0.0568168946958003	NOC2 like nucleolar associated transcriptional repressor	NOC2L	1031	chr1
ENSG00000187961	267.505667784935	0.0585094944184029	0.120763565123458	0.48449624982989	0.628033725183768	0.709609707236681	kelch like family member 17	KLHL17	1495	chr1
ENSG00000188290	800.232702463707	1.86588486941083	0.106464477320569	17.5258914181542	9.09055700817311e-69	3.36807542062075e-67	hes family bHLH transcription factor 4	HES4	1211	chr1
ENSG00000187608	36885.9367611058	6.02476577645132	0.159537900442632	37.7638527255019	0	0	ISG15 ubiquitin-like modifier	ISG15	1073	chr1
ENSG00000188157	10120.0730805229	1.56793407767808	0.144085443692916	10.8819741779035	1.4048689764751e-27	2.183705884077e-26	agrin	AGRN	35997	chr1
ENSG00000131591	245.91528171295	0.0842993930050715	0.128319824543383	0.656947539517333	0.511214648955718	0.606074761586796	chromosome 1 open reading frame 159	C1orf159	34539	chr1
ENSG00000078808	4064.99448427952	0.453443904180453	0.0550473784597904	8.23733875922307	1.76083389458012e-16	1.63314428434401e-15	stromal cell derived factor 4	SDF4	15160	chr1
ENSG00000176022	1582.46166471362	-0.285017638512158	0.0719912832710616	-3.95905761867044	7.52460834779019e-05	0.000235701498346682	beta-1,3-galactosyltransferase 6	B3GALT6	2792	chr1
ENSG00000160087	986.482063688306	0.179432263350445	0.0768729106511713	2.33414166096378	0.0195883054593226	0.0379228943817823	ubiquitin conjugating enzyme E2 J2	UBE2J2	19943	chr1
ENSG00000162572	129.069029471293	0.0422829770965269	0.156045583550017	0.270965548236577	0.786417529828262	0.838535895239085	sodium channel epithelial 1 delta subunit	SCNN1D	9873	chr1
ENSG00000131584	1634.67372469329	-0.384092932650978	0.0679697448150444	-5.65093974820932	1.59573021944335e-08	7.88296357083038e-08	ArfGAP with coiled-coil, ankyrin repeat and PH domains 3	ACAP3	13546	chr1
ENSG00000169972	314.977797761177	-0.337467499823061	0.122721533631172	-2.74986377563768	0.00596200446372772	0.0130547017689973	pseudouridylate synthase-like 1	PUSL1	2592	chr1
ENSG00000127054	1587.59573245897	0.202890893622126	0.0597323694539159	3.39666575220422	0.000682122316640246	0.00181480300998227	cleavage and polyadenylation specific factor 3-like	CPSF3L	5866	chr1
ENSG00000224051	497.483622465505	0.121087307091768	0.0965981598041708	1.25351567087037	0.210018099618449	0.294395304289499	ceramide-1-phosphate transfer protein	CPTP	4134	chr1
ENSG00000107404	1948.81042058399	-0.0892753958706696	0.0655286555331051	-1.36238711361272	0.173075748377268	0.250069726196599	dishevelled segment polarity protein 1	DVL1	4900	chr1
ENSG00000162576	34.5280863794902	-0.178243307176384	0.24800815357687	-0.718699383893994	0.472326163013441	0.569319899561343	matrix remodeling associated 8	MXRA8	5845	chr1
ENSG00000175756	1356.04166164044	-0.0528533417904397	0.0672944468425591	-0.785404208969791	0.43221661378026	0.530144830617668	aurora kinase A interacting protein 1	AURKAIP1	1453	chr1
ENSG00000221978	2425.76451327185	0.226453403941526	0.0577139230583709	3.92372224831251	8.71912541387379e-05	0.000270457035263128	cyclin L2	CCNL2	13628	chr1
ENSG00000224870	841.204778565527	-0.0278589770815791	0.0772607172349098	-0.360583982114409	0.71841046527976	0.78463218952219	uncharacterized LOC148413	LOC148413	2517	chr1
ENSG00000242485	1425.27581525296	0.188005772266692	0.0595764882115533	3.15570416972368	0.00160111163281395	0.00396947573332615	mitochondrial ribosomal protein L20	MRPL20	5418	chr1
ENSG00000179403	2187.76677344981	-0.092118195524238	0.148006964896844	-0.622390950239683	0.533684829652835	0.626771994908843	von Willebrand factor A domain containing 1	VWA1	7360	chr1
ENSG00000160072	1129.37362292252	0.117551966401947	0.0797865417195492	1.47333076316484	0.140661869481426	0.210174915404606	ATPase family, AAA domain containing 3B	ATAD3B	23528	chr1
ENSG00000197785	899.409583435837	-0.058082250101275	0.0904166461089251	-0.642384478974183	0.520623574844046	0.614628101297383	ATPase family, AAA domain containing 3A	ATAD3A	22158	chr1
ENSG00000205090	129.992794394207	-0.279727878431353	0.153067740737882	-1.82747767153869	0.0676279804045037	0.112365626475866	transmembrane protein 240	TMEM240	5583	chr1
ENSG00000160075	2229.16753203697	0.281454906466684	0.0528458979546391	5.32595560602025	1.00423658224806e-07	4.57376693801108e-07	SSU72 homolog, RNA polymerase II CTD phosphatase	SSU72	12531	chr1
ENSG00000228594	420.480987285145	-0.607867647821034	0.0986379246538605	-6.1626159507528	7.15529002087216e-10	4.03909055793287e-09	fibronectin type III domain containing 10	FNDC10	2089	chr1
ENSG00000197530	946.852666259431	0.177911472054186	0.174846644488112	1.01752866104492	0.308902004906224	0.404504214933302	mindbomb E3 ubiquitin protein ligase 2	MIB2	15196	chr1
ENSG00000248333	485.209270756165	0.154210466102009	0.109161730569047	1.41267883257372	0.157750178163427	0.231387855590573	cyclin dependent kinase 11B	CDK11B	84676	chr1
ENSG00000189339	2255.92538353003	-0.321441841644165	0.0595188681968966	-5.40067127252473	6.63919891965326e-08	3.0839794649998e-07	solute carrier family 35 member E2B	SLC35E2B	7072	chr1
ENSG00000008128	12.2749001546851	-0.300830078191826	0.328926297013743	-0.914582023155346	0.360411099651856	0.457537839976817	cyclin dependent kinase 11A	CDK11A	6222	chr1
ENSG00000215790	236.113715981322	-0.604579146440338	0.134570873862712	-4.49264487244934	7.03440336295055e-06	2.5542343556682e-05	solute carrier family 35 member E2	SLC35E2	18615	chr1
ENSG00000008130	2129.97985605882	0.105530173858629	0.0637166321237997	1.65624218263117	0.0976727839239498	0.154286864296742	NAD kinase	NADK	7411	chr1
ENSG00000078369	13591.1028706255	-0.0170353807619871	0.0364342506254737	-0.467565010108277	0.640095691820664	0.720326985190791	G protein subunit beta 1	GNB1	105802	chr1
ENSG00000067606	385.478253385983	-0.265658674998165	0.103192771638291	-2.57439228330204	0.0100416348812837	0.0208685408090782	protein kinase C zeta	PRKCZ	80680	chr1
ENSG00000162585	633.588066670774	0.183060043449142	0.0812604455744763	2.25275707209068	0.0242744702448787	0.0459373221811085	Fanconi anemia core complex associated protein 20	FAAP20	10316	chr1
ENSG00000157933	671.175385719299	-0.0432661666793581	0.103488155582327	-0.418078440338411	0.675889767470694	0.748464947689339	SKI proto-oncogene	SKI	81519	chr1
ENSG00000116151	169.260500830984	0.0328848551730819	0.166739431510088	0.19722302562302	0.843653012635805	0.883721798202277	MORN repeat containing 1	MORN1	59429	chr1
ENSG00000269896	42.7335393922474	0.261217006654234	0.229190456942593	1.13973771045652	0.254395591373282	0.344380158886507	small nuclear ribonucleoprotein polypeptide N pseudogene	LOC100129534	2248	chr1
ENSG00000157916	3233.58427306385	0.0545875841774223	0.0508390823908731	1.07373267986486	0.282942510000627	0.376101922224637	retention in endoplasmic reticulum sorting receptor 1	RER1	13672	chr1
ENSG00000157911	2105.33422720029	0.265849175646336	0.0644285877116001	4.1262611068917	3.68708629759821e-05	0.000120959577413593	peroxisomal biogenesis factor 10	PEX10	7770	chr1
ENSG00000149527	13.2043810493228	-0.138791877388504	0.320830589596004	-0.432601758963424	0.665304111363533	0.740133034727604	phospholipase C eta 2	PLCH2	29211	chr1
ENSG00000157881	983.234573695027	0.0400915589434847	0.0720740451354837	0.556255152158051	0.578036441123517	0.665466531683917	pantothenate kinase 4	PANK4	18061	chr1
ENSG00000197921	5411.17239548631	0.172090970502018	0.0613217885790519	2.80635928092949	0.00501047916608	0.0112077560646782	hes family bHLH transcription factor 5	HES5	1501	chr1
ENSG00000157873	73.6749578868344	3.4527636607505	0.253356135195744	13.628103610291	2.72571496901923e-42	6.3516868787212e-41	TNF receptor superfamily member 14	TNFRSF14	7463	chr1
ENSG00000157870	693.097501856809	-0.367730929083124	0.0863724410852991	-4.25750302367815	2.06722865340591e-05	7.04759914580081e-05	family with sequence similarity 213 member B	FAM213B	4720	chr1
ENSG00000177133	104.093107437046	0.60876644153226	0.172517325404723	3.52872640532829	0.00041756459013944	0.00115572966104799	long intergenic non-protein coding RNA 982	LINC00982	4170	chr1
ENSG00000142611	372.826785885878	0.575197869927328	0.112651822705204	5.10597925639031	3.29085792364127e-07	1.41897984053559e-06	PR/SET domain 16	PRDM16	369444	chr1
ENSG00000162591	18.0568511999896	-0.0711387922953751	0.305942273646511	-0.232523578541387	0.816131375979738	0.86178993595689	multiple EGF like domains 6	MEGF6	123554	chr1
ENSG00000158109	362.841233843867	-0.160747537568519	0.108350049760616	-1.48359449694455	0.137916530197899	0.206756690796572	tumor protein p63 regulated 1 like	TPRG1L	5107	chr1
ENSG00000116213	604.473061224772	0.109909043141106	0.089898599616864	1.22258904598652	0.221484952509674	0.307483818387984	WD repeat containing, antisense to TP73	WRAP73	19341	chr1
ENSG00000078900	71.1485544824867	-0.47077374525539	0.191494035846371	-2.4584251053807	0.0139547879995159	0.0280679026185868	tumor protein p73	TP73	45530	chr1
ENSG00000227372	1502.20324960338	-0.111877319695878	0.0584716694772787	-1.91335942168287	0.0557020554295397	0.0948701115311791	TP73 antisense RNA 1	TP73-AS1	10788	chr1
ENSG00000130764	2127.71075329669	0.345365690924552	0.0553028530372419	6.24498867521313	4.2383082246547e-10	2.4346803398806e-09	leucine rich repeat containing 47	LRRC47	16285	chr1
ENSG00000116198	1162.67512543707	0.150666406398804	0.0626707053318517	2.40409622966585	0.0162125049557987	0.0320700751279607	centrosomal protein 104	CEP104	45153	chr1
ENSG00000169598	319.914552039093	0.0197547977835815	0.11845990487551	0.166763579663024	0.867556076550634	0.902415399245505	DNA fragmentation factor subunit beta	DFFB	28149	chr1
ENSG00000198912	695.809878514359	-0.097956120911212	0.0808121909754399	-1.21214534253851	0.225456749564303	0.312038914680112	chromosome 1 open reading frame 174	C1orf174	11161	chr1
ENSG00000196581	263.543114232855	0.033177457836383	0.116261530292475	0.28536918233331	0.775361315274709	0.829622982689457	adherens junctions associated protein 1	AJAP1	128747	chr1
ENSG00000131697	339.770975994057	-0.174232902143779	0.101870468296078	-1.71033769705845	0.0872034447212279	0.140023417028296	nephrocystin 4	NPHP4	115381	chr1
ENSG00000069424	91.1986477831156	-0.276871191160774	0.18371655356313	-1.50705630924888	0.131796224444003	0.198987292296062	potassium voltage-gated channel subfamily A regulatory beta subunit 2	KCNAB2	75181	chr1
ENSG00000116254	20.7655456315743	0.179204318758362	0.293125997227847	0.611355937218584	0.540963966579836	0.633461567888846	chromodomain helicase DNA binding protein 5	CHD5	78348	chr1
ENSG00000116251	5978.66210816636	-0.439373260424569	0.0425951910341938	-10.315090735756	6.02243948270682e-25	8.4428693648958e-24	ribosomal protein L22	RPL22	14600	chr1
ENSG00000158286	39.8457660168132	-0.949245324050018	0.252541233723878	-3.75877360719596	0.00017074824921695	0.000505887292211419	ring finger protein 207	RNF207	2178	chr1
ENSG00000116237	3571.20765775559	-0.237350337885632	0.0535495359308227	-4.43235097671527	9.32111244363483e-06	3.33441072217384e-05	isoprenylcysteine carboxyl methyltransferase	ICMT	14792	chr1
ENSG00000158292	361.477632229701	-0.46860423199584	0.122962116033035	-3.81096428000591	0.000138425770218495	0.000417363382542523	G protein-coupled receptor 153	GPR153	13630	chr1
ENSG00000097021	742.525209411033	0.269777884361569	0.0812966993912062	3.31843588216757	0.000905231024228362	0.00235646105842346	acyl-CoA thioesterase 7	ACOT7	94673	chr1
ENSG00000187017	23.2116757789866	-0.279527850793228	0.284408090742734	-0.982840713368027	0.325685840522443	0.422297027730471	espin	ESPN	12902	chr1
ENSG00000215788	60.1121873328833	0.427769051456707	0.20366641799118	2.10034160602378	0.0356988017795392	0.0644280565621709	TNF receptor superfamily member 25	TNFRSF25	5042	chr1
ENSG00000171680	419.206002537143	0.846218911555101	0.0965293113608483	8.76644513076183	1.84395910483607e-18	1.90026837845689e-17	pleckstrin homology and RhoGEF domain containing G5	PLEKHG5	11567	chr1
ENSG00000162408	2106.74986244464	-0.134089248211203	0.049629418033458	-2.70180980403207	0.00689631993508801	0.0148566313937714	nucleolar protein 9	NOL9	33252	chr1
ENSG00000173662	7.85909535574297	-0.377423185266308	0.348315264672279	-1.08356774320935	0.278556499433113	0.37114046180478	taste 1 receptor member 1	TAS1R1	24480	chr1
ENSG00000204859	475.977854023929	0.204957984576493	0.10437045554503	1.96375481458031	0.0495585324652199	0.0859206792740041	zinc finger and BTB domain containing 48	ZBTB48	9278	chr1
ENSG00000162413	1660.04546665989	0.277988576365122	0.0607626720340569	4.57498933241961	4.76244252053931e-06	1.77331156568256e-05	kelch like family member 21	KLHL21	12151	chr1
ENSG00000116273	1190.66995666773	-0.216163101792623	0.0612402392748866	-3.52975599625501	0.000415943085885108	0.00115238039917328	PHD finger protein 13	PHF13	10338	chr1
ENSG00000041988	815.803756046622	0.640292691409343	0.0825133353683849	7.75986922054143	8.50170077512975e-15	7.10419566561409e-14	THAP domain containing 3	THAP3	10437	chr1
ENSG00000007923	2249.54968251342	0.206987771897519	0.0525639001931381	3.93783130888259	8.22213630422136e-05	0.000256289826264456	DnaJ heat shock protein family (Hsp40) member C11	DNAJC11	67739	chr1
ENSG00000171735	1914.5044026878	0.21934732838826	0.0529327414362156	4.14388755308613	3.41467227546326e-05	0.000112709133202599	calmodulin binding transcription activator 1	CAMTA1	102878	chr1
ENSG00000049245	2717.03918378184	0.0930824224789111	0.0493749104634978	1.88521703847393	0.0594005413702392	0.100036626008923	vesicle associated membrane protein 3	VAMP3	10164	chr1
ENSG00000049246	919.436002405997	-0.656299091362205	0.0966580260557798	-6.78990786531752	1.1220517915388e-11	7.33971758080377e-11	period circadian clock 3	PER3	60524	chr1
ENSG00000049249	21.4218398550923	3.31238434110473	0.340050082851419	9.74087203075918	2.01814991539009e-22	2.55322398961502e-21	TNF receptor superfamily member 9	TNFRSF9	27295	chr1
ENSG00000116288	5622.49774647422	0.00461919364869058	0.0538608850124902	0.0857615623586469	0.931655962652168	0.951078194980947	Parkinsonism associated deglycase	PARK7	23629	chr1
ENSG00000116285	1445.17145010022	0.311811868339405	0.058753691430098	5.30710259644506	1.11381492734852e-07	5.0482129635974e-07	ERBB receptor feedback inhibitor 1	ERRFI1	2266	chr1
ENSG00000162426	26.9721923006942	0.148073872561377	0.267281762752145	0.553999161920703	0.579579419295207	0.667023565389874	solute carrier family 45 member 1	SLC45A1	14030	chr1
ENSG00000142599	1053.48690232346	0.0358355982314328	0.0666800207456814	0.537426320968169	0.590973166129073	0.676965417277741	arginine-glutamic acid dipeptide repeats	RERE	288868	chr1
ENSG00000074800	31348.3724549229	-0.106026755505596	0.052676979269341	-2.01277212505816	0.0441386076836206	0.0775970932852209	enolase 1	ENO1	10577	chr1
ENSG00000142583	119.113329586192	1.22751495531583	0.166022069808646	7.39368541020262	1.42814073455421e-13	1.08819972728138e-12	solute carrier family 2 member 5	SLC2A5	31004	chr1
ENSG00000180758	62.5569289288646	-0.261455971243596	0.204234691527439	-1.28017414322811	0.200483897456241	0.283070570004502	G protein-coupled receptor 157	GPR157	24754	chr1
ENSG00000228526	303.453210467334	0.164219641350665	0.110751231334387	1.48277937294298	0.138133038131031	0.207059102967471	microRNA 34a	MIR34A	110	chr1
ENSG00000049239	2108.39509733252	-0.0224811719185969	0.0537981467920004	-0.417880043443053	0.676034824195142	0.748566390959279	hexose-6-phosphate dehydrogenase/glucose 1-dehydrogenase	H6PD	36532	chr1
ENSG00000171621	408.323027742731	2.59324122100557	0.124662397235463	20.8021125737495	4.14159732937669e-96	1.94641176503089e-94	splA/ryanodine receptor domain and SOCS box containing 1	SPSB1	13825	chr1
ENSG00000171612	312.223808578546	0.109440844468466	0.109363773016324	1.00070472561449	0.316969582099757	0.413252559793995	solute carrier family 25 member 33	SLC25A33	43304	chr1
ENSG00000188807	1436.48085212479	0.143569918383729	0.0742188776338438	1.93441241582803	0.0530624411270363	0.0910263949025163	transmembrane protein 201	TMEM201	26004	chr1
ENSG00000171608	68.1790137333495	0.474607679968767	0.195117374471909	2.43242141430668	0.014998245775775	0.0299558516956259	phosphatidylinositol-4,5-bisphosphate 3-kinase catalytic subunit delta	PIK3CD	37648	chr1
ENSG00000171603	9165.04390266122	0.127463337688653	0.0435333350211739	2.92794791914418	0.00341207194113719	0.0079116005853686	calsyntenin 1	CLSTN1	95472	chr1
ENSG00000178585	3233.2482923812	-0.455177253169756	0.0507885942811056	-8.96219435904119	3.18280220557574e-19	3.43149691217e-18	catenin beta interacting protein 1	CTNNBIP1	61983	chr1
ENSG00000162441	2062.14909703548	-0.322161950783875	0.0621836236002931	-5.18081662231012	2.20916593151726e-07	9.7171384644784e-07	leucine zipper and CTNNBIP1 domain containing	LZIC	13065	chr1
ENSG00000173614	548.620410015879	-0.395098689996853	0.0851911247198364	-4.63779168658934	3.52151439243372e-06	1.33619097984379e-05	nicotinamide nucleotide adenylyltransferase 1	NMNAT1	42071	chr1
ENSG00000162444	11.0640394889834	-0.773698543503692	0.338342453884337	-2.28673208053336	0.0222114659916073	0.0424729084124057	retinol binding protein 7	RBP7	18824	chr1
ENSG00000130939	1753.02033575333	-0.545009394148915	0.0762312822685271	-7.14941921387471	8.71458163838613e-13	6.19217229049202e-12	ubiquitination factor E4B	UBE4B	148256	chr1
ENSG00000054523	19868.5630246225	-0.385657763820353	0.0496492530818789	-7.76764482608322	7.99588923828058e-15	6.68951187467859e-14	kinesin family member 1B	KIF1B	63706	chr1
ENSG00000142657	11701.3457331171	-0.194100583816886	0.0480706030804391	-4.03782293914822	5.39495476477425e-05	0.000172581867246833	phosphogluconate dehydrogenase	PGD	21117	chr1
ENSG00000175279	42.064261267208	-0.373108788312474	0.230976486961188	-1.61535398352114	0.106234059353136	0.165846394074313	centromere protein S	CENPS	12714	chr1
ENSG00000160049	3088.34968198129	-0.498123050394126	0.0476767414330093	-10.4479256640062	1.49764988598174e-25	2.16679614185684e-24	DNA fragmentation factor subunit alpha	DFFA	12011	chr1
ENSG00000142655	530.120468160054	0.688625753790719	0.0976495995427698	7.05200796536914	1.76354104762183e-12	1.23184001855081e-11	peroxisomal biogenesis factor 14	PEX14	45065	chr1
ENSG00000130940	27.9221495343392	0.900541208875873	0.27669481282879	3.25463712047648	0.00113537335998436	0.00290215439068825	castor zinc finger 1	CASZ1	3392	chr1
ENSG00000120948	843.382007110738	-0.372014254056874	0.109357671644629	-3.40181213134985	0.000669406377317469	0.00178572120272974	TAR DNA binding protein	TARDBP	12871	chr1
ENSG00000116649	801.956211169374	-0.177768781612384	0.0896844752516407	-1.98215779390572	0.0474615828052425	0.0826946338874621	spermidine synthase	SRM	5443	chr1
ENSG00000171824	2486.88614031009	0.148615136859323	0.0491247796959951	3.02525808317139	0.00248421048529544	0.00593912049275565	exosome component 10	EXOSC10	20171	chr1
ENSG00000198793	4946.39000693323	-0.213115170994912	0.0405270112907809	-5.25859579098523	1.45159565505377e-07	6.50131024912952e-07	mechanistic target of rapamycin	MTOR	25028	chr1
ENSG00000120942	613.297102390641	-0.178541470126993	0.0889358670548911	-2.00753055026491	0.044693201061795	0.078446958374538	UbiA prenyltransferase domain containing 1	UBIAD1	15237	chr1
ENSG00000204624	539.41344200473	-0.914885359331294	0.0924688716125242	-9.89398208691215	4.42084776745303e-23	5.73277527622034e-22	dispatched RND transporter family member 3	DISP3	25882	chr1
ENSG00000116661	181.565286386814	1.21674669506148	0.146501177900275	8.30537141407651	9.95076828837708e-17	9.34678134666137e-16	F-box protein 2	FBXO2	6471	chr1
ENSG00000132879	960.390675166273	0.589096393275998	0.06923959289101	8.50808574515008	1.76828409709129e-17	1.72456955290832e-16	F-box protein 44	FBXO44	8471	chr1
ENSG00000116663	1028.49713277503	1.67876632666253	0.0765230311045567	21.9380531904018	1.12620072591295e-106	5.97440953273139e-105	F-box protein 6	FBXO6	10260	chr1
ENSG00000116670	2953.23990644264	0.171059361601125	0.0606928299621871	2.81844431554268	0.00482569806005612	0.0108359630160471	MAD2 mitotic arrest deficient-like 2 (yeast)	MAD2L2	6959	chr1
ENSG00000162490	3906.66179263509	-0.192161788504121	0.0436563222311512	-4.40169438659227	1.07408777735606e-05	3.79671865771622e-05	dorsal inhibitory axon guidance protein	DRAXIN	28556	chr1
ENSG00000177674	3383.36377435938	2.08828957404632	0.0739398454558269	28.2430881640659	1.73063240847967e-175	1.44270874290224e-173	angiotensin II receptor associated protein	AGTRAP	14687	chr1
ENSG00000177000	1920.58194621121	0.320415298970527	0.0631985999393718	5.0699746399115	3.97868713773268e-07	1.69520880328403e-06	methylenetetrahydrofolate reductase	MTHFR	10761	chr1
ENSG00000011021	2493.59740581083	-0.132758772958914	0.133744723455862	-0.992628116672776	0.320891217460824	0.417277762352725	chloride voltage-gated channel 6	CLCN6	10692	chr1
ENSG00000199347	85.7786490054151	0.0434830722495405	0.182709571397286	0.237990116866896	0.811888759607789	0.858604702734054	RNA, U5E small nuclear 1	RNU5E-1	245257	chr5
ENSG00000116685	1242.97645726194	0.350550824278292	0.0611029946794855	5.73704817770551	9.63408587719542e-09	4.8727111849087e-08	KIAA2013	KIAA2013	4254	chr1
ENSG00000083444	3451.52678254898	0.358375876842578	0.0496086623750644	7.22405845441047	5.04585513419186e-13	3.66341115367325e-12	procollagen-lysine,2-oxoglutarate 5-dioxygenase 1	PLOD1	40876	chr1
ENSG00000116688	3537.22599642401	0.109301358843649	0.0452830346785397	2.41373749837152	0.0157898335715667	0.0313266686610514	mitofusin 2	MFN2	33335	chr1
ENSG00000116691	1033.95925239266	0.110098977627221	0.0809340568835822	1.36035411873138	0.173717890152406	0.250790542375471	migration and invasion inhibitory protein	MIIP	12808	chr1
ENSG00000120949	11.9969930217203	2.56568349534998	0.352773512123293	7.27289154989983	3.51872813992441e-13	2.58415246982912e-12	TNF receptor superfamily member 8	TNFRSF8	18307	chr1
ENSG00000028137	10.1191560379402	2.0434639215834	0.348983815737223	5.85546902015103	4.75665687586775e-09	2.47462776918751e-08	TNF receptor superfamily member 1B	TNFRSF1B	42218	chr1
ENSG00000048707	3819.73003570745	-0.182439595973353	0.0557322484565745	-3.27350144711111	0.00106223846724273	0.00273166539363467	vacuolar protein sorting 13 homolog D	VPS13D	281986	chr1
ENSG00000162496	369.246639774687	2.40355272724019	0.112309000244345	21.4012476472136	1.30080309394336e-101	6.48318410344367e-100	dehydrogenase/reductase 3	DHRS3	37690	chr1
ENSG00000162493	3078.54458762605	0.472403809295797	0.0659188746975366	7.16644225896428	7.69718416830836e-13	5.49995225903871e-12	podoplanin	PDPN	34201	chr1
ENSG00000116731	526.204361020613	-0.0608288277666622	0.0948310436441616	-0.641444251050455	0.521234090487739	0.615089605433164	PR/SET domain 2	PRDM2	75719	chr1
ENSG00000189337	2364.22015988476	0.00958403058421173	0.0623501961895259	0.153712917840373	0.877836098874569	0.910201715017276	kazrin, periplakin interacting protein	KAZN	138356	chr1
ENSG00000175147	240.865123815384	-0.253240672732444	0.119448997610528	-2.12007365317667	0.0339998344447287	0.0617357294695224	TMEM51 antisense RNA 1	TMEM51-AS1	40650	chr1
ENSG00000171729	1212.99035214706	0.214606656329039	0.0712193832510289	3.01331809589827	0.00258407904261009	0.00615272820285532	transmembrane protein 51	TMEM51	67947	chr1
ENSG00000142621	36.7650135530111	0.144139487100722	0.255583442393467	0.56396253900838	0.572779626862514	0.660883651861245	forkhead associated phosphopeptide binding domain 1	FHAD1	42823	chr1
ENSG00000142634	2363.25060233916	-0.301038966325589	0.0727733843173568	-4.13666300048367	3.52393057959128e-05	0.000116041965123856	EF-hand domain family member D2	EFHD2	20449	chr1
ENSG00000132906	265.226678532165	0.0958764293892514	0.117028898660343	0.819254308010855	0.412641335783979	0.510922279873983	caspase 9	CASP9	33617	chr1
ENSG00000116138	1000.95086765602	-0.00423883301918082	0.0700071361808788	-0.0605485847646854	0.951718721754724	0.965859916589829	DnaJ heat shock protein family (Hsp40) member C16	DNAJC16	44877	chr1
ENSG00000116771	13.3989026557642	-0.37812390571628	0.320648216445912	-1.17924842965738	0.238299266715696	0.326809756203811	agmatinase	AGMAT	13412	chr1
ENSG00000197312	706.128868592815	0.163917794476265	0.0840334970648397	1.95062445574277	0.0511017358322145	0.08821395418836	DNA damage inducible 1 homolog 2	DDI2	16844	chr1
ENSG00000116786	4393.00550824514	0.288275995793747	0.054317134529135	5.30727547196216	1.11275945001655e-07	5.04506186386589e-07	pleckstrin homology and RUN domain containing M2	PLEKHM2	50438	chr1
ENSG00000162461	36.1094301781975	0.182401603804043	0.253386781211796	0.719854457015184	0.471614611436227	0.568790692743769	solute carrier family 25 member 34	SLC25A34	5076	chr1
ENSG00000162458	283.907574533715	-0.351633791392316	0.119222087977394	-2.9494013849094	0.00318390165878871	0.00743175712188932	filamin binding LIM protein 1	FBLIM1	27830	chr1
ENSG00000233954	184.319177995568	0.00976553034641037	0.132548225488254	0.0736753005212865	0.94126875269175	0.958138698372375	ubiquinol-cytochrome c reductase hinge protein like	UQCRHL	538	chr1
ENSG00000179743	119.594575123354	-8.3637868394009e-05	0.151979509656984	-0.000550323320444835	0.999560905541331	0.999800088219452	uncharacterized LOC729614	FLJ37453	13933	chr1
ENSG00000065526	1612.32778338191	0.578055920722534	0.0700375251486344	8.25351723230907	1.53799686454638e-16	1.432157319679e-15	spen family transcriptional repressor	SPEN	92592	chr1
ENSG00000116809	1407.6064603455	0.220512877544911	0.060450869072772	3.64780326448993	0.000264492035308293	0.000760774482335725	zinc finger and BTB domain containing 17	ZBTB17	34264	chr1
ENSG00000142627	4687.81670247082	0.358291027779905	0.0617416192916773	5.8030714433854	6.51110314942002e-09	3.34512104209932e-08	EPH receptor A2	EPHA2	31751	chr1
ENSG00000142632	59.0282568955805	1.4453356420639	0.229593655495568	6.29518981674038	3.07023921967932e-10	1.78048448329643e-09	Rho guanine nucleotide exchange factor 19	ARHGEF19	9107	chr1
ENSG00000132881	358.039847436956	-0.101931572685741	0.0987360401540398	-1.03236439831611	0.301901443359396	0.397044766104643	REM2 and RAB like small GTPase 1	RSG1	5478	chr1
ENSG00000037637	1640.22338942915	0.0513486582658257	0.0553031259102407	0.928494681280164	0.353151025472863	0.450772886597471	F-box protein 42	FBXO42	102390	chr1
ENSG00000055070	3960.03093584061	0.277001422749983	0.0582627105230461	4.75435180174828	1.99084111866457e-06	7.82535219390888e-06	SUZ RNA binding domain containing 1	SZRD1	31119	chr1
ENSG00000187144	21.9266152277277	0.244304255059415	0.293108963018326	0.833492952735602	0.404566770702854	0.502800679955636	spermatogenesis associated 21	SPATA21	38782	chr1
ENSG00000157191	2281.5013223393	0.277826488645381	0.0504262403189761	5.50956182511253	3.59728033156012e-08	1.71360241644556e-07	NECAP endocytosis associated 2	NECAP2	19418	chr1
ENSG00000080947	129.287629691755	-0.225070074879456	0.15584229694188	-1.44421687369889	0.148677979894121	0.220066534281673	ciliary rootlet coiled-coil, rootletin pseudogene 3	CROCCP3	25266	chr1
ENSG00000219481	1284.70444812464	-0.674412380095586	0.062359350836541	-10.8149358684535	2.92497185722448e-27	4.48186333265086e-26	neuroblastoma breakpoint family member 1	NBPF1	20854	chr1
ENSG00000058453	379.055354468632	0.0310897731547874	0.111797009343367	0.278091277551979	0.780942291268197	0.834065186396027	ciliary rootlet coiled-coil, rootletin	CROCC	4777	chr1
ENSG00000117122	143.758014434548	0.463994056606787	0.151073617585814	3.07131095436452	0.00213121073268583	0.0051800774576996	microfibrillar associated protein 2	MFAP2	6175	chr1
ENSG00000159363	1485.85924629981	-0.218398024307703	0.0643108400614338	-3.39597529901764	0.000683845305469846	0.00181869606971234	ATPase 13A2	ATP13A2	25971	chr1
ENSG00000117118	2637.38986303743	0.0561678780176405	0.0546314655763696	1.02812321480051	0.303891871783841	0.39925006232014	succinate dehydrogenase complex iron sulfur subunit B	SDHB	35441	chr1
ENSG00000117115	19.4506842670105	-0.310065801123702	0.289431482307817	-1.07129258590446	0.284037892435311	0.377307282894483	peptidyl arginine deiminase 2	PADI2	40423	chr1
ENSG00000179051	6381.42285359512	0.426393362513016	0.0387725163186263	10.9973095119487	3.93703606438385e-28	6.23735181919636e-27	regulator of chromosome condensation 2	RCC2	33000	chr1
ENSG00000074964	2476.95926768338	0.41396944627457	0.0619925348339468	6.67773059100468	2.42670606452823e-11	1.53228216563201e-10	Rho guanine nucleotide exchange factor 10 like	ARHGEF10L	79560	chr1
ENSG00000117154	9.89527992680752	-0.459149775097908	0.341005853186437	-1.34645716725243	0.178155125090131	0.256113993726881	immunoglobin superfamily member 21	IGSF21	17117	chr1
ENSG00000159423	1371.93690833605	0.241829750811975	0.0657977106957656	3.67535204879913	0.000237521657028981	0.000689142491545655	aldehyde dehydrogenase 4 family member A1	ALDH4A1	31370	chr1
ENSG00000169991	747.183108869517	-0.0146078040331847	0.0789938113479898	-0.184923398224619	0.853289118365737	0.891881043563859	intermediate filament family orphan 2	IFFO2	52053	chr1
ENSG00000127481	6898.31586542121	-0.0817118820399459	0.115156941797726	-0.709569746854455	0.47797098575395	0.574541554843711	ubiquitin protein ligase E3 component n-recognin 4	UBR4	31337	chr1
ENSG00000127463	5723.95403413369	0.0661594843588497	0.0384947548719122	1.71866231072232	0.0856758785303038	0.13780758916009	ER membrane protein complex subunit 1	EMC1	35896	chr1
ENSG00000053372	2205.70631664502	-0.127927537303561	0.0675858999335794	-1.89281399566008	0.0583826096854161	0.0986187973277352	MRT4 homolog, ribosome maturation factor	MRTO4	8548	chr1
ENSG00000162482	12.8815445022171	-0.340470433038732	0.323077469120128	-1.05383527352115	0.29195834100733	0.385925112393361	aldo-keto reductase family 7 member A3	AKR7A3	6224	chr1
ENSG00000053371	1591.11027940527	-0.221997856235135	0.0608062940234936	-3.65090258829723	0.000261320345759007	0.000752578951748899	aldo-keto reductase family 7 member A2	AKR7A2	4408	chr1
ENSG00000040487	1001.82971841848	0.121792540306629	0.0738626905917129	1.64890473567847	0.0991671528085954	0.156171817731292	PQ loop repeat containing 2	PQLC2	17055	chr1
ENSG00000077549	4684.00217863192	-0.200998057075875	0.0414208576250602	-4.85258076728638	1.21865127351543e-06	4.91708760748591e-06	capping actin protein of muscle Z-line beta subunit	CAPZB	146800	chr1
ENSG00000173436	221.508551048862	-0.237145258299149	0.123649177703732	-1.91788787198698	0.055125230379721	0.0940008342223296	mitochondrial inner membrane organizing system 1	MINOS1	32845	chr1
ENSG00000158747	518.794419596605	-0.213719319374253	0.100172498655214	-2.13351291265938	0.0328826735373884	0.0599794012621938	neuroblastoma 1, DAN family BMP antagonist	NBL1	14742	chr1
ENSG00000162542	86.9275035440953	0.987243869384313	0.186605860971882	5.29052980566926	1.21962543440989e-07	5.50462591328087e-07	transmembrane and coiled-coil domains 4	TMCO4	54734	chr1
ENSG00000169914	793.70738371641	-0.35545172262024	0.0708580716086302	-5.01639001105623	5.26513953530563e-07	2.21369796433369e-06	OTU deubiquitinase 3	OTUD3	30550	chr1
ENSG00000127472	264.495490457917	0.81264906272604	0.130467167207279	6.22876299164943	4.70132374965971e-10	2.68852752609164e-09	phospholipase A2 group V	PLA2G5	21694	chr1
ENSG00000162543	58.6237715516368	1.25902587866016	0.22554329181867	5.582191642713	2.37506457799564e-08	1.15375578962293e-07	UBX domain protein 10	UBXN10	7365	chr1
ENSG00000162545	299.083948849838	0.716553254071187	0.11692936094263	6.12808663533838	8.89421549776658e-10	4.97458019353918e-09	calcium/calmodulin dependent protein kinase II inhibitor 1	CAMK2N1	3845	chr1
ENSG00000090432	1850.3163973808	0.118826720229754	0.0559126706156645	2.12521989955643	0.0335682683311601	0.0610550127244023	mitochondrial E3 ubiquitin protein ligase 1	MUL1	8734	chr1
ENSG00000183114	24.7595363145722	0.0155229749332821	0.2736380129383	0.056728137902325	0.954761759296798	0.967790938989344	family with sequence similarity 43 member B	FAM43B	2582	chr1
ENSG00000158828	3639.01263749421	-0.067466984838145	0.0507029781324636	-1.33063159844151	0.1833102599991	0.262232910243861	PTEN induced putative kinase 1	PINK1	18057	chr1
ENSG00000244038	7159.0739438398	0.206749649579565	0.058266841478879	3.54832430130109	0.00038769055641519	0.00108202595508066	dolichyl-diphosphooligosaccharide--protein glycosyltransferase non-catalytic subunit	DDOST	9778	chr1
ENSG00000117245	18.705574942459	-0.0935037886869939	0.298699413529561	-0.313036398639398	0.754253008717786	0.813313318993886	kinesin family member 17	KIF17	21175	chr1
ENSG00000189410	81.6609022276411	0.402624385573044	0.186955216502335	2.15358733019367	0.0312725487417983	0.0573712398649312	SH2 domain containing 5	SH2D5	12909	chr1
ENSG00000127483	10339.5112994881	-0.0451063403809279	0.0419781528653758	-1.07451941788826	0.282589946559871	0.375668932280113	heterochromatin protein 1 binding protein 3	HP1BP3	43954	chr1
ENSG00000075151	6158.76103695447	-0.293845591453758	0.063059662192477	-4.65980281589288	3.16512443982157e-06	1.21014381052965e-05	eukaryotic translation initiation factor 4 gamma 3	EIF4G3	244703	chr1
ENSG00000117298	1010.15800183692	0.0936027853818661	0.0678819844624573	1.37890466996636	0.167924148140028	0.243985651488857	endothelin converting enzyme 1	ECE1	62444	chr1
ENSG00000142794	723.225696280439	-0.254522003785823	0.0742991183853435	-3.42563962153327	0.000613353599250933	0.00164727303266499	neuroblastoma breakpoint family member 3	NBPF3	44811	chr1
ENSG00000162551	870.910227002422	-0.28186707024377	0.0793947159973258	-3.55019936406428	0.000384939519283538	0.00107499062164825	alkaline phosphatase, liver/bone/kidney	ALPL	69048	chr1
ENSG00000076864	1554.74388659004	-0.0933740733934234	0.058173276508803	-1.60510253156007	0.10847124227824	0.168849588541375	RAP1 GTPase activating protein	RAP1GAP	23836	chr1
ENSG00000090686	1639.77438409477	-0.0634473818450871	0.061977748078871	-1.02371228080675	0.305971193067011	0.401379407915276	ubiquitin specific peptidase 48	USP48	104897	chr1
ENSG00000142798	448.704853626279	-0.1739248428669	0.0990140547077469	-1.75656722048463	0.0789916043303751	0.128562163700977	heparan sulfate proteoglycan 2	HSPG2	8470	chr1
ENSG00000218510	224.627523663299	-0.181933626240847	0.119810674803594	-1.51850931929973	0.128886051966578	0.195415086910461	long intergenic non-protein coding RNA 339	LINC00339	5674	chr1
ENSG00000070831	14174.3423985457	-0.00802908591303973	0.0399841525406457	-0.200806704728275	0.840849720103072	0.881378664025411	cell division cycle 42	CDC42	40317	chr1
ENSG00000162552	11.1456345455198	1.42267109483241	0.341983296397087	4.1600601837012	3.18163744723548e-05	0.000105639716568357	Wnt family member 4	WNT4	26588	chr1
ENSG00000184677	1865.56013532893	-0.0840693899569516	0.0523159317128401	-1.6069558011201	0.10806406416282	0.168328018974563	zinc finger and BTB domain containing 40	ZBTB40	79307	chr1
ENSG00000133216	1015.74996819642	-0.0694469748393342	0.0688298864976436	-1.00896541274569	0.312991222041752	0.409170359814686	EPH receptor B2	EPHB2	204493	chr1
ENSG00000004487	5768.6060770533	-0.174929510348455	0.0394862708147392	-4.4301349998126	9.41741156103645e-06	3.36627996202949e-05	lysine demethylase 1A	KDM1A	64244	chr1
ENSG00000169641	949.014776681163	0.0619255988991562	0.0692446612168439	0.894301420657289	0.371160640066625	0.468746653171919	leucine zipper protein 1	LUZP1	86619	chr1
ENSG00000179546	16.4235466618494	-1.6062817476431	0.321235883358327	-5.0003185536136	5.72356697961161e-07	2.39636937367595e-06	5-hydroxytryptamine receptor 1D	HTR1D	2835	chr1
ENSG00000125944	10194.8097835117	0.0139451750878563	0.0444100401088915	0.314009513471803	0.753513813253798	0.812772998925446	heterogeneous nuclear ribonucleoprotein R	HNRNPR	34578	chr1
ENSG00000125945	3193.79760636172	0.317136305421128	0.0587901506018756	5.39437817686097	6.87612598283263e-08	3.18769097615263e-07	zinc finger protein 436	ZNF436	10417	chr1
ENSG00000249087	86.9812446717845	-0.414623850372711	0.196730240023357	-2.1075755833139	0.0350677174436001	0.0634444364807673	ZNF436 antisense RNA 1	ZNF436-AS1	2620	chr1
ENSG00000204219	18.8891152414472	0.00313229114976343	0.295432365628291	0.0106023967384279	0.991540669821901	0.994096004070135	transcription elongation factor A3	TCEA3	16105	chr1
ENSG00000088280	1616.3339670573	0.33411716726166	0.0719026807734403	4.6467970827741	3.37128490468848e-06	1.28301209484136e-05	ArfGAP with SH3 domain, ankyrin repeat and PH domain 3	ASAP3	55695	chr1
ENSG00000007968	516.05425115387	-0.681147574027094	0.0868158810178675	-7.84588678984791	4.29904641541313e-15	3.66452495726481e-14	E2F transcription factor 2	E2F2	24793	chr1
ENSG00000117318	1171.57757366514	-0.171318072560167	0.186895080100192	-0.916653731432231	0.359324118692478	0.456530371249946	inhibitor of DNA binding 3, HLH protein	ID3	1865	chr1
ENSG00000142676	13750.797506593	-0.0850753248582803	0.0378420794113793	-2.24816728313026	0.0245655250352494	0.0463978662331313	ribosomal protein L11	RPL11	4647	chr1
ENSG00000011007	2924.27643667312	0.124133803260669	0.0442559351373647	2.80490747456525	0.00503310254312513	0.011254766264804	transcription elongation factor B subunit 3	TCEB3	18694	chr1
ENSG00000236810	87.184201115206	0.0794781700495567	0.17371086950452	0.457531358148481	0.647289168352853	0.725338838436687	TCEB3 antisense RNA 1	TCEB3-AS1	17916	chr1
ENSG00000057757	1761.05517766116	-0.285497770912192	0.0633300099784954	-4.5080960986606	6.54119494878857e-06	2.38141971507911e-05	PITH domain containing 1	PITHD1	9847	chr1
ENSG00000011009	1075.83645506157	0.0757510696315511	0.0698611960690796	1.08430822679657	0.278228158879589	0.370820837943342	lysophospholipase II	LYPLA2	4384	chr1
ENSG00000117308	1076.24439499532	-0.0632757362720969	0.0726424594243216	-0.871057185749846	0.383722929685168	0.481329120487306	UDP-galactose-4-epimerase	GALE	3972	chr1
ENSG00000117305	1307.27901692265	0.148102003654923	0.0605208944265189	2.44712185862917	0.0144002142810437	0.0288849901183066	3-hydroxymethyl-3-methylglutaryl-CoA lyase	HMGCL	13184	chr1
ENSG00000179163	376.75666942179	-0.185170141820357	0.0968157238567141	-1.91260401145589	0.0557987657511573	0.0949989927479891	fucosidase, alpha-L- 1, tissue	FUCA1	23288	chr1
ENSG00000189266	4900.31021287989	0.353793921734291	0.0430892876570609	8.21071642098302	2.19872612791722e-16	2.02187520823904e-15	proline rich nuclear receptor coactivator 2	PNRC2	3649	chr1
ENSG00000188529	4790.51878293973	0.0978902016965091	0.0471581108410645	2.07578717532654	0.0379136390123985	0.0679524589670643	serine and arginine rich splicing factor 10	SRSF10	14009	chr1_gl000191_random
ENSG00000158055	44.056867614976	0.616745087681832	0.230812545970734	2.6720605029851	0.00753870546458974	0.0161116389488142	grainyhead like transcription factor 3	GRHL3	35997	chr1
ENSG00000001460	33.2070882511832	0.119586300723693	0.2650322385527	0.451214166913186	0.651835200099231	0.728800253663558	sperm tail PG-rich repeat containing 1	STPG1	58099	chr1
ENSG00000001461	735.071407801922	-0.107066962479045	0.0828364679254661	-1.29250999179952	0.196180587936679	0.277750620102426	NIPA like domain containing 3	NIPAL3	57229	chr1
ENSG00000117602	124.488930585464	-0.967645476430145	0.159874422963537	-6.05253459867585	1.42584361325266e-09	7.82481967225842e-09	RCAN family member 3	RCAN3	34124	chr1
ENSG00000133226	751.848487364993	-0.0930710569540592	0.113889534848314	-0.817204645519164	0.413811488179108	0.512190003707327	serine and arginine repetitive matrix 1	SRRM1	30179	chr1
ENSG00000169504	6194.7803083244	0.087373136645653	0.0436673233255599	2.00088143700144	0.0454051684826647	0.0794874230749649	chloride intracellular channel 4	CLIC4	99056	chr1
ENSG00000117614	978.062481549807	0.220251141694369	0.0642951992627958	3.42562344031518	0.000613390136761722	0.00164727303266499	SYF2 pre-mRNA splicing factor	SYF2	5730	chr1
ENSG00000117616	1043.66690480599	-0.294406177258052	0.0679459105374932	-4.33294917867936	1.47125081695566e-05	5.11160200730934e-05	arginine and serine rich protein 1	RSRP1	95917	chr1
ENSG00000183726	5801.54456765277	1.01644470413937	0.0402181868209698	25.273260295499	6.28746103972757e-141	4.33772866312239e-139	transmembrane protein 50A	TMEM50A	24064	chr1
ENSG00000204178	702.664743707409	-0.170475630745699	0.0776454146884439	-2.19556597681577	0.0281230237152167	0.0522503246393751	transmembrane protein 57	TMEM57	69311	chr1
ENSG00000157978	97.8793396219684	0.0713490747832654	0.188593493394503	0.378322038046224	0.705191375930207	0.773754717949119	low density lipoprotein receptor adaptor protein 1	LDLRAP1	25302	chr1
ENSG00000117643	1649.28197909938	0.17542593234166	0.0642120723527344	2.7319774290728	0.00629554537260453	0.0137078844750196	mannosidase alpha class 1C member 1	MAN1C1	167300	chr1
ENSG00000162430	2886.02934631506	0.17717364312482	0.17628162167037	1.00506020676459	0.314867859870375	0.410842262201919	selenoprotein N	SELENON	18047	chr1
ENSG00000117640	1597.4637028052	0.033362351323956	0.0591411676389547	0.564113842452802	0.572676658014867	0.660883651861245	mitochondrial fission regulator 1 like	MTFR1L	12115	chr1
ENSG00000127423	182.272006167563	-0.729423585392498	0.140165658598893	-5.20401068766682	1.95032782388762e-07	8.63012359353749e-07	aurora kinase A and ninein interacting protein	AUNIP	25352	chr1
ENSG00000182749	662.581020018999	0.0660705151853951	0.0778558419736037	0.848626301001224	0.396089267183497	0.494405542504891	progestin and adipoQ receptor family member 7	PAQR7	9770	chr1
ENSG00000158006	668.705262255015	-0.203626426662409	0.0828232076448199	-2.4585672597425	0.0139492644513701	0.028060822844217	platelet activating factor acetylhydrolase 2	PAFAH2	38391	chr1
ENSG00000158008	171.168012689154	0.167172782568511	0.143093833801014	1.16827383911581	0.24269632432705	0.33173096495392	exostosin like glycosyltransferase 1	EXTL1	14684	chr1
ENSG00000158014	21.5753419681466	-2.03548866899059	0.31272129906703	-6.50895437906932	7.56756988418308e-11	4.58209322213506e-10	solute carrier family 30 member 2	SLC30A2	8091	chr1
ENSG00000175087	1658.0772897278	-0.112584282120578	0.0572124553834635	-1.96782818297149	0.0490878102845794	0.085220625143862	PDLIM1 interacting kinase 1 like	PDIK1L	13772	chr1
ENSG00000142684	195.102315526946	0.467780365306423	0.132302290440212	3.53569362820529	0.000406706069946051	0.00112924633417812	zinc finger protein 593	ZNF593	977	chr1
ENSG00000142675	15.4820494020996	-0.316210203643719	0.317872510654606	-0.994770522913531	0.319847885829255	0.416118387600198	connector enhancer of kinase suppressor of Ras 1	CNKSR1	7697	chr1
ENSG00000130695	852.410384376421	-0.508371323357091	0.0769208154384126	-6.6090215042523	3.86868527329245e-11	2.40163728955943e-10	centrosomal protein 85	CEP85	44606	chr1
ENSG00000142669	2048.77200997668	0.214229589959705	0.0777375616353056	2.75580537198647	0.00585478236741038	0.0128540879535323	SH3 domain binding glutamate rich protein like 3	SH3BGRL3	1801	chr1
ENSG00000158062	312.747033123603	0.279787012600904	0.10336525186084	2.70678015642606	0.00679392313155749	0.0146585878073429	UBX domain protein 11	UBXN11	35984	chr1
ENSG00000117682	1407.10411592922	0.0967682095312901	0.0599307206049581	1.61466787908578	0.106382637101473	0.166059834218249	dehydrodolichyl diphosphate synthase subunit	DHDDS	39023	chr1
ENSG00000198830	7717.57598024032	-0.0646652529767046	0.0487239899442183	-1.32717482806184	0.184450857091462	0.263702965860139	high mobility group nucleosomal binding domain 2	HMGN2	4232	chr1
ENSG00000117676	35.4231902695328	-0.136355222609542	0.252246238630229	-0.540563947950188	0.588808172854887	0.675041364598982	ribosomal protein S6 kinase A1	RPS6KA1	45272	chr1
ENSG00000117713	652.859116656653	-0.0882140659413443	0.210395543667738	-0.419277254658274	0.675013517584462	0.747790247885651	AT-rich interaction domain 1A	ARID1A	86080	chr1
ENSG00000060642	520.256982324247	-0.157083316214575	0.0843084017794666	-1.86319883782725	0.0624342963419763	0.104642450965699	phosphatidylinositol glycan anchor biosynthesis class V	PIGV	10441	chr1
ENSG00000204160	664.73311189576	-0.243302061906052	0.0897143475358256	-2.7119637893916	0.00668858990232489	0.0144535876534578	zinc finger DHHC-type containing 18	ZDHHC18	18589	chr1
ENSG00000142751	898.825244798348	-0.0776046698790658	0.068091441193942	-1.13971254710306	0.25440607810352	0.344380158886507	GPN-loop GTPase 2	GPN2	10997	chr1
ENSG00000198746	635.027135836794	0.357056506307422	0.0809528921612589	4.41067016600423	1.03051186306606e-05	3.6528267887219e-05	G-patch domain containing 3	GPATCH3	9978	chr1
ENSG00000090273	2256.30548557629	0.0160115162830684	0.0616523755136834	0.259706396544522	0.795090258177511	0.845133695642888	nuclear distribution C, dynein complex regulator	NUDC	25150	chr1
ENSG00000253368	370.496721587623	0.128193390375933	0.117007830529377	1.09559667755525	0.273255316331822	0.365124615536109	TMF1-regulated nuclear protein 1	TRNP1	7183	chr1
ENSG00000158246	503.187313452708	0.228457213443418	0.240635624477547	0.949390656264754	0.342421960819443	0.439763371047804	family with sequence similarity 46 member B	FAM46B	7823	chr1
ENSG00000090020	145.210129835019	0.0985227606414192	0.297370964410907	0.331312644583822	0.74040834116694	0.802214050599025	solute carrier family 9 member A1	SLC9A1	5214	chr1
ENSG00000142784	1160.23218198204	-0.201163756827384	0.0688989596743446	-2.91969222435574	0.00350377233707993	0.00810276281056877	WD and tetratricopeptide repeats 1	WDTC1	74118	chr1
ENSG00000186501	1751.50927498118	0.295701398590168	0.065148108026283	4.53890999368503	5.65457640674986e-06	2.08072366202133e-05	transmembrane protein 222	TMEM222	14256	chr1
ENSG00000142733	901.332262487508	-0.108328610706002	0.0691398260713597	-1.56680479054425	0.117160327310197	0.180449838774805	mitogen-activated protein kinase kinase kinase 6	MAP3K6	11668	chr1
ENSG00000181773	55.4499189703793	-0.286806686757837	0.211927074231384	-1.35332726032304	0.175951104081231	0.253465872521872	G protein-coupled receptor 3	GPR3	3170	chr1
ENSG00000158195	1966.3405176234	-0.237122803921408	0.151361204433214	-1.56660225326124	0.11720769084716	0.180483090743757	WAS protein family member 2	WASF2	85945	chr1
ENSG00000126705	240.526402638173	-0.0421582513740844	0.163178517944809	-0.258356626258509	0.796131687724847	0.845965423868474	AT-hook DNA binding motif containing 1	AHDC1	56372	chr1
ENSG00000126709	31869.7445851339	4.98961681344012	0.164327755723355	30.3638103707819	1.65131864203392e-202	1.53157070077385e-200	interferon alpha inducible protein 6	IFI6	6153	chr1
ENSG00000009780	1260.49431767593	0.110803372516987	0.0594571948889107	1.86358224137568	0.0623803934248952	0.104577137887917	family with sequence similarity 76 member A	FAM76A	36934	chr1
ENSG00000117758	5649.14175805223	-0.0679118574506434	0.0452608575411447	-1.50045450174928	0.133496710717096	0.201056181696196	syntaxin 12	STX12	51270	chr1
ENSG00000117751	3020.31107578499	-0.022086278066842	0.0503683886412267	-0.438494831037027	0.661027616348544	0.736467555323811	protein phosphatase 1 regulatory subunit 8	PPP1R8	20932	chr1
ENSG00000252947	16.0322472501359	-0.183045516024699	0.307753531339598	-0.594779579710861	0.551990819088978	0.642857062830034	small Cajal body-specific RNA 1	SCARNA1	166	chr1
ENSG00000130775	1453.79154970741	4.51874844812848	0.0881386104135993	51.2686599768682	0	0	thymocyte selection associated family member 2	THEMIS2	14139	chr1
ENSG00000117748	2024.36077302403	-0.319306244256527	0.057408438014672	-5.56200891887916	2.66686659243659e-08	1.28746868759305e-07	replication protein A2	RPA2	23188	chr1
ENSG00000158156	413.680247966483	-0.231941029714406	0.0960016128706154	-2.41601180208296	0.0156915527286661	0.0311451524893664	XK related 8	XKR8	8101	chr1
ENSG00000158161	977.474918247484	-0.669224306257606	0.0995063358629831	-6.725444168491	1.75057607646356e-11	1.12307915487275e-10	EYA transcriptional coactivator and phosphatase 3	EYA3	100103	chr1
ENSG00000126698	5923.69025887084	0.0114598359601525	0.042881258464189	0.267245793864069	0.789279919480486	0.840534200617763	DnaJ heat shock protein family (Hsp40) member C8	DNAJC8	32753	chr1
ENSG00000130770	1420.81134874821	-0.210066237640394	0.0674428824370575	-3.1147280491228	0.00184114572399928	0.00452214062865834	ATPase inhibitory factor 1	ATPIF1	2015	chr1
ENSG00000130766	2021.21877837313	0.209206074221435	0.0586207381906715	3.56880654660072	0.000358611090675697	0.00100607939200984	sestrin 2	SESN2	23040	chr1
ENSG00000130772	421.489444154347	0.198470980905387	0.0956702147830639	2.07453261556303	0.0380298729161267	0.0681520627242936	mediator complex subunit 18	MED18	6349	chr1
ENSG00000204138	902.838428106155	0.804272746824916	0.0933128473829008	8.61909982796533	6.74825045027099e-18	6.77485645563048e-17	phosphatase and actin regulator 4	PHACTR4	62221	chr1
ENSG00000180198	1295.63931400228	-0.239216287850882	0.0673381059372402	-3.55246534664688	0.000381639282766527	0.00106630404862501	regulator of chromosome condensation 1	RCC1	33254	chr1
ENSG00000242125	202.667786217964	-0.0701357169458581	0.135639906678718	-0.517072878205264	0.605105285691329	0.689600417129715	small nucleolar RNA host gene 3	SNHG3	4950	chr1
ENSG00000180098	526.322642825119	-0.205075436512813	0.0859519986971451	-2.38592981689005	0.017036001864361	0.0335191354468075	tRNA selenocysteine 1 associated protein 1	TRNAU1AP	25529	chr1
ENSG00000197989	171.047346394681	0.413064614281236	0.143860476020776	2.87128630258101	0.00408805083079959	0.00931096956990539	small nucleolar RNA host gene 12	SNHG12	3334	chr1
ENSG00000120656	568.87445744553	-0.165469746158108	0.0856258039561802	-1.93247524125775	0.0533008750787194	0.0913570867063353	TATA-box binding protein associated factor 12	TAF12	38154	chr1
ENSG00000188060	157.327289508107	0.399892541799164	0.142212747574639	2.81193176152711	0.00492449493951497	0.0110365741123231	RAB42, member RAS oncogene family	RAB42	2082	chr1
ENSG00000162419	795.300424109631	0.0102948842408293	0.0710185849674838	0.144960424733088	0.884742118165061	0.915329346598337	glucocorticoid modulatory element binding protein 1	GMEB1	46876	chr1
ENSG00000198492	3773.20094578338	0.309123780024061	0.0503042589970893	6.1450816727456	7.99223803128301e-10	4.49162494494858e-09	YTH N6-methyladenosine RNA binding protein 2	YTHDF2	33155	chr1
ENSG00000116329	203.818751707278	0.255878690084942	0.138288523526617	1.85032483939777	0.0642667446364864	0.107392406471065	opioid receptor delta 1	OPRD1	51555	chr1
ENSG00000159023	442.88614077352	-0.285727726461018	0.0970169275935218	-2.94513270568771	0.00322816171955525	0.00752605081868225	erythrocyte membrane protein band 4.1	EPB41	232956	chr1
ENSG00000253304	17.0391079822629	0.334243090943877	0.302903284663539	1.1034647290641	0.269825400405032	0.36116837739391	transmembrane protein 200B	TMEM200B	3077	chr1
ENSG00000116350	2485.94892788563	0.0932782772998116	0.0490430345950095	1.90196789554502	0.0571753518567319	0.0969419858055121	serine and arginine rich splicing factor 4	SRSF4	27430	chr1
ENSG00000116353	414.583524818324	-0.136794723046742	0.0934086799930234	-1.46447549689129	0.143064073286976	0.213127576468897	mitochondrial trans-2-enoyl-CoA reductase	MECR	31306	chr1
ENSG00000060656	169.368810486098	0.0837102142163536	0.138757126880005	0.603285871497939	0.546318530252849	0.638195943937999	protein tyrosine phosphatase, receptor type U	PTPRU	90298	chr1
ENSG00000162510	30.6677201296497	2.97667482056992	0.309229706145213	9.62609594555605	6.20419818543286e-22	7.67577699531689e-21	matrilin 1, cartilage matrix protein	MATN1	12309	chr1
ENSG00000186056	49.9619574338378	2.61862395789245	0.252985366158758	10.3508910323657	4.1460897417382e-25	5.84164857475286e-24	MATN1 antisense RNA 1	MATN1-AS1	7975	chr1
ENSG00000162512	21264.8238758981	-0.0169480656938562	0.218758147120364	-0.0774739863038384	0.938246484983453	0.955924779731795	syndecan 3	SDC3	39168	chr1
ENSG00000134644	4883.55448057318	-0.127255722142911	0.0479984387477782	-2.65124711267409	0.00801951431573177	0.0170714847228794	pumilio RNA binding family member 1	PUM1	134212	chr1
ENSG00000084628	97.9361226478399	1.41595078884838	0.180137268865358	7.8603988933946	3.82912092011876e-15	3.27392176350814e-14	Na+/K+ transporting ATPase interacting 1	NKAIN1	8443	chr1
ENSG00000060688	1737.63587808942	0.03085376753871	0.0573743871224575	0.537762041324415	0.590741340977023	0.676810575947579	small nuclear ribonucleoprotein U5 subunit 40	SNRNP40	37230	chr1
ENSG00000121766	1772.03828283312	-0.156012557267982	0.055064087153541	-2.8332905407649	0.00460714903581593	0.0103935441763212	zinc finger CCHC-type containing 17	ZCCHC17	67939	chr1
ENSG00000121769	96.6044746828818	-0.597701632759792	0.18135340399228	-3.29578392024688	0.000981474731036973	0.0025360800015079	fatty acid binding protein 3	FABP3	7824	chr1
ENSG00000168528	331.912591509509	-0.279779444462707	0.138379813018488	-2.0218226803452	0.043194673813795	0.0761219839892033	serine incorporator 2	SERINC2	20868	chr1
ENSG00000162517	2372.11264719002	0.170608790242505	0.0499878579799912	3.41300462025789	0.000642508528640949	0.00171887907232407	penta-EF-hand domain containing 1	PEF1	10952	chr1
ENSG00000084636	771.452309753329	-0.346513838958834	0.0772854945679813	-4.48355594922196	7.34093436240908e-06	2.65658361099584e-05	collagen type XVI alpha 1 chain	COL16A1	51921	chr1
ENSG00000121753	7374.64557450502	-0.383800236097539	0.11776563896917	-3.25901714164701	0.00111798912634615	0.0028598059752471	adhesion G protein-coupled receptor B2	ADGRB2	17615	chr1
ENSG00000134668	39.8326952694844	2.52742722163777	0.274827442826936	9.19641501460007	3.70091075147503e-20	4.17320894318904e-19	SPOC domain containing 1	SPOCD1	25556	chr1
ENSG00000184007	6629.52759312453	-0.194817875003884	0.0413174036107339	-4.71515288906663	2.41529318593541e-06	9.41446731673403e-06	protein tyrosine phosphatase type IVA, member 2	PTP4A2	13238	chr1
ENSG00000121774	4759.67543621809	0.0213259779390659	0.049989959821725	0.426605222631083	0.669666893116061	0.743219338940521	KH RNA binding domain containing, signal transduction associated 1	KHDRBS1	47166	chr1
ENSG00000121775	257.369957907063	-0.0116957928077303	0.119023780507634	-0.0982643364027588	0.921722396516965	0.943758017489406	transmembrane protein 39B	TMEM39B	27661	chr1
ENSG00000025800	4228.62992895147	-0.14440977332883	0.0573130346600498	-2.51966719587248	0.01174658384131	0.0240477863905198	karyopherin subunit alpha 6	KPNA6	68280	chr1
ENSG00000084652	4633.72053569442	0.110787642114676	0.0492718287660386	2.2484986835122	0.0245444089449887	0.0463687295525522	taxilin alpha	TXLNA	18221	chr1
ENSG00000160050	1196.29272936856	-0.143863682377398	0.0741716989200346	-1.93960344001961	0.0524279024912986	0.0900923649559063	coiled-coil domain containing 28B	CCDC28B	4790	chr1
ENSG00000160051	276.682337404786	-0.093524216429402	0.11133106436654	-0.840054992391773	0.400877553679707	0.499136747802658	IQ motif containing C	IQCC	3053	chr1
ENSG00000160055	511.90928918719	0.299113610923333	0.0887526026552641	3.37019537427157	0.000751149060416793	0.00198151113037054	transmembrane protein 234	TMEM234	7849	chr1
ENSG00000084623	7049.67228144177	-0.0763594630328304	0.0549573324858307	-1.38943175694558	0.164701499105981	0.239800862353599	eukaryotic translation initiation factor 3 subunit I	EIF3I	10021	chr1
ENSG00000116478	1373.75219381864	0.116957167061484	0.065145104867701	1.79533316124066	0.0726006346109517	0.119532403566791	histone deacetylase 1	HDAC1	35883	chr1
ENSG00000175130	11349.3027767502	-0.197098128057416	0.0636907143713789	-3.09461324154949	0.00197069688785161	0.00481080877015197	MARCKS like 1	MARCKSL1	2411	chr1
ENSG00000162526	9.3466465444365	-0.671594305945351	0.340258948323541	-1.9737741189594	0.0484074329517944	0.0841541830300249	testis specific serine kinase 3	TSSK3	2063	chr1
ENSG00000225828	14.0148404216616	-0.469400526479645	0.315810262421496	-1.48633715345564	0.137189964046818	0.205821686821176	family with sequence similarity 229 member A	FAM229A	974	chr1
ENSG00000160058	2804.41930149969	0.228759420776675	0.055278440027117	4.13831180229501	3.49870688563851e-05	0.000115319816270575	BSD domain containing 1	BSDC1	29358	chr1
ENSG00000273274	211.137429450297	-1.00861720985263	0.136843841460086	-7.37057071104527	1.69899119389024e-13	1.28064433102437e-12	zinc finger and BTB domain containing 8B	ZBTB8B	22802	chr1
ENSG00000160062	414.788066468019	-0.256290962955704	0.0946530543257896	-2.70768824927262	0.00677536334963197	0.014620795641232	zinc finger and BTB domain containing 8A	ZBTB8A	66771	chr1
ENSG00000176261	898.782252321133	0.213549447392248	0.0721082656998403	2.96151135129466	0.00306133208743245	0.00717075696345399	zinc finger and BTB domain containing 8 opposite strand	ZBTB8OS	50413	chr1
ENSG00000162521	11431.7940628746	-0.144085905636901	0.0346436081059808	-4.15909062347424	3.19517122067037e-05	0.000106000194504861	RB binding protein 4, chromatin remodeling factor	RBBP4	34854	chr1
ENSG00000162520	616.071835575615	-0.663598490080481	0.0885909253095586	-7.49059215446394	6.85635649262352e-14	5.36742720397945e-13	syncoilin, intermediate filament protein	SYNC	22855	chr1
ENSG00000162522	40.3351985399498	-0.518164373641896	0.232940236919131	-2.22445199032653	0.0261180492223781	0.04900633431932	KIAA1522	KIAA1522	33060	chr1
ENSG00000134684	2458.21035215572	0.266988189757391	0.0683962704142174	3.90354895289572	9.47923663863544e-05	0.000292480081789137	tyrosyl-tRNA synthetase	YARS	8517	chr1
ENSG00000116497	2428.48625054721	0.100145599034284	0.050513845025666	1.98253763860977	0.0474190991284565	0.0826308925337854	S100P binding protein	S100PBP	41362	chr1
ENSG00000160097	259.742547723044	-0.367765897625457	0.116488645555495	-3.15709652105322	0.00159348591084757	0.00395266917843078	fibronectin type III domain containing 5	FNDC5	8546	chr1
ENSG00000121900	320.598279078526	0.469413478544908	0.103310420619653	4.54371858839968	5.5270433947609e-06	2.03864843773069e-05	transmembrane protein 54	TMEM54	6758	chr1
ENSG00000116514	1124.22686534456	1.25731160632809	0.0673465415132333	18.6692824616842	8.80274636461377e-78	3.59424089902087e-76	ring finger protein 19B	RNF19B	28237	chr1
ENSG00000004455	2338.42064016728	0.480171408412068	0.0539132016675341	8.90637902332596	5.27264435507758e-19	5.64983811728091e-18	adenylate kinase 2	AK2	28972	chr1
ENSG00000142920	255.469017196949	1.40863022112611	0.118402750369831	11.8969383458261	1.22769067529454e-32	2.25049841721204e-31	antizyme inhibitor 2	AZIN2	39247	chr1
ENSG00000116525	115.281846313455	-0.132001923236269	0.156976010070448	-0.840905073183027	0.400401116113238	0.498632191994123	tripartite motif containing 62	TRIM62	36669	chr1
ENSG00000160094	584.022636988534	-0.16786611930378	0.111179605758695	-1.50986431511655	0.131078049880292	0.198159335985912	zinc finger protein 362	ZNF362	44147	chr1
ENSG00000121903	475.38925201986	0.149582752552806	0.0879701677732354	1.70038043963258	0.0890593886615583	0.142660040970505	zinc finger and SCAN domain containing 20	ZSCAN20	19961	chr1
ENSG00000121904	1107.37704008727	-0.354437082715568	0.0716073104444363	-4.94973321181492	7.43152805134913e-07	3.06835348936157e-06	CUB and Sushi multiple domains 2	CSMD2	651835	chr1
ENSG00000142698	64.2340950355404	0.0301051877606179	0.193938481475647	0.155230604733791	0.87663952162853	0.909297622604619	chromosome 1 open reading frame 94	C1orf94	52108	chr1
ENSG00000163866	1341.41628761083	0.0878546323753062	0.0690275846018667	1.27274672700818	0.203107930650739	0.286201916093068	small integral membrane protein 12	SMIM12	9455	chr1
ENSG00000116544	18.7617673896658	-0.613113384340424	0.296941747763982	-2.06475980207318	0.03894573306284	0.0695796646951236	DLG associated protein 3	DLGAP3	39948	chr1
ENSG00000241014	21.0282146011623	0.219300346235598	0.285862935444293	0.76715208249981	0.442991098829123	0.540944314160073	uncharacterized LOC653160	LOC653160	9649	chr1
ENSG00000163867	516.569640349545	0.0233639004843148	0.0890957890294836	0.262233498786157	0.793141428494458	0.843556022635547	zinc finger MYM-type containing 6	ZMYM6	45803	chr1
ENSG00000197056	1371.20979369506	-0.196634313235852	0.0677810383634567	-2.90102243907	0.00371947242737656	0.00854234361190698	zinc finger MYM-type containing 1	ZMYM1	36484	chr1
ENSG00000116560	10360.3545076949	0.0316331045926094	0.0423653820854831	0.746673416724565	0.455260719947709	0.55226733502535	splicing factor proline and glutamine rich	SFPQ	9543	chr1
ENSG00000146463	5272.55458303144	-0.122137897204353	0.0483214360795984	-2.52761314881369	0.011484081257395	0.0235793223881859	zinc finger MYM-type containing 4	ZMYM4	152978	chr1
ENSG00000142687	5312.30994710248	0.214056907377259	0.0460054685584254	4.65285789026177	3.27365869694461e-06	1.24857271379927e-05	KIAA0319 like	KIAA0319L	123947	chr1
ENSG00000020129	1715.43610118132	0.331440740298475	0.081436712595756	4.06991797352767	4.70296933118441e-05	0.00015144880543398	neurochondrin	NCDN	8988	chr1
ENSG00000116819	9.0321170438992	0.7990067908347	0.343024974723108	2.32929626036607	0.0198433763567365	0.0383742731118607	transcription factor AP-2 epsilon	TFAP2E	21957	chr1
ENSG00000126067	4862.99949266171	0.287501830514173	0.0411205639164098	6.99168015055944	2.71613557362344e-12	1.86468032885276e-11	proteasome subunit beta 2	PSMB2	31996	chr1
ENSG00000142686	1641.59992594589	0.184712982411224	0.0669386566105332	2.75943665087175	0.00579011118947327	0.0127320626799455	chromosome 1 open reading frame 216	C1orf216	5314	chr1
ENSG00000092853	1705.60186593457	-0.607555447401852	0.0867729540623006	-7.00166836507196	2.52932229575904e-12	1.73984080314859e-11	claspin	CLSPN	37839	chr1
ENSG00000134698	1765.94363034677	-0.102756912638129	0.0522917959030418	-1.96506757634903	0.0494064167375161	0.0856967632341715	argonaute 4, RISC catalytic component	AGO4	49663	chr1
ENSG00000092847	2431.89542256432	-0.584533910342884	0.0599215268876612	-9.75499024647267	1.75617557805808e-22	2.22581348151162e-21	argonaute 1, RISC catalytic component	AGO1	41090	chr1
ENSG00000126070	2538.92867273527	-0.124889671209272	0.058988679423184	-2.1171803205377	0.0342445469291585	0.0621156430181148	argonaute 3, RISC catalytic component	AGO3	125381	chr1
ENSG00000092850	81.168870833413	0.234267879681755	0.188575385695093	1.24230359555272	0.214124569257789	0.299073959554736	tektin 2	TEKT2	4201	chr1
ENSG00000116863	3165.22157141793	0.982817416974612	0.0619366523125837	15.8681068523772	1.05371530340297e-56	3.32371234778347e-55	ADP-ribosylhydrolase like 2	ADPRHL2	5081	chr1
ENSG00000171812	215.920715874854	0.260737632083148	0.127762594678242	2.04079787781229	0.0412709216098745	0.073140811986631	collagen type VIII alpha 2 chain	COL8A2	5007	chr1
ENSG00000054116	2678.703250693	0.0540946166008241	0.052068400197484	1.03891451236557	0.298844496382495	0.393556248889565	trafficking protein particle complex 3	TRAPPC3	12946	chr1
ENSG00000116871	2859.79762240529	0.257828918952434	0.0522174711894408	4.93759872087737	7.90903723722224e-07	3.2511319784942e-06	MAP7 domain containing 1	MAP7D1	24639	chr1
ENSG00000054118	6349.65309945268	0.181805536384373	0.0430228557698403	4.22578959790533	2.38104389964166e-05	8.03918028314405e-05	thyroid hormone receptor associated protein 3	THRAP3	51018	chr1
ENSG00000214193	46.4835320837274	-0.291191444173042	0.226214226747376	-1.28723753744379	0.198011507305716	0.280201188220325	SH3 domain containing 21	SH3D21	1728	chr1
ENSG00000142694	244.565555406223	0.565431120004622	0.142170757321714	3.97712673588089	6.97529931403081e-05	0.000219723497285204	eva-1 homolog B	EVA1B	1218	chr1
ENSG00000196182	2241.53469728406	0.813628922042279	0.0561061894941314	14.5015893857376	1.18376785929293e-47	3.09303523682788e-46	serine/threonine kinase 40	STK40	46261	chr1
ENSG00000181817	507.093634944681	0.597499510186969	0.0894666809559307	6.67845843617787	2.41468686251331e-11	1.52606902118677e-10	LSM10, U7 small nuclear RNA associated	LSM10	4463	chr1
ENSG00000116885	292.686413393488	0.264565662452258	0.110790521459728	2.387981020095	0.0169412166704067	0.033358436542222	organic solute carrier partner 1	OSCP1	30010	chr1
ENSG00000116898	1173.05048689704	0.122860667966304	0.0682062949537639	1.80130980651551	0.0716540630333337	0.118171826752454	mitochondrial ribosomal protein S15	MRPS15	8679	chr1
ENSG00000163873	2898.97876495233	-0.12524302109198	0.0538846468302156	-2.32428026273618	0.0201104779479393	0.0388383827251206	glutamate ionotropic receptor kainate type subunit 3	GRIK3	238717	chr1
ENSG00000233621	65.7940654849078	0.461053202336054	0.200737862534133	2.2967924262801	0.0216306138252892	0.0415095569502843	long intergenic non-protein coding RNA 1137	LINC01137	19565	chr1
ENSG00000163874	79.6576947661148	0.754381225285992	0.185477810864483	4.06723166383051	4.75749418620962e-05	0.0001530051817084	zinc finger CCCH-type containing 12A	ZC3H12A	9860	chr1
ENSG00000163875	1783.3486063366	-0.146818366461394	0.053958192107183	-2.7209652645469	0.00650916007993823	0.0141137617153638	MYST/Esa1 associated factor 6	MEAF6	24307	chr1
ENSG00000163877	758.619569225555	0.38221991070237	0.0843647452443471	4.5305643915043	5.88263212829559e-06	2.1584035356767e-05	Smad nuclear interacting protein 1	SNIP1	19896	chr1
ENSG00000163879	807.054448071531	0.549892970419401	0.0696055519322152	7.90013088258979	2.78610718949237e-15	2.39971901530386e-14	dynein axonemal light intermediate chain 1	DNALI1	9939	chr1
ENSG00000134697	2113.91394841157	0.18610236811351	0.0521959830227169	3.56545384024119	0.000363227090067149	0.00101800988520921	G protein nucleolar 2	GNL2	29174	chr1
ENSG00000116922	832.19305589163	0.0739696212091041	0.0697527000608489	1.06045531061273	0.288937510637062	0.382871590166719	chromosome 1 open reading frame 109	C1orf109	8934	chr1
ENSG00000134690	629.431213190113	-0.479172911623042	0.0840114808309173	-5.70365986748207	1.17261954918371e-08	5.87148258359596e-08	cell division cycle associated 8	CDCA8	17319	chr1
ENSG00000185090	1694.63702218253	-0.401609539522447	0.0569951754912091	-7.04637780410713	1.83635240817374e-12	1.28014512078015e-11	mannosidase endo-alpha like	MANEAL	7505	chr1
ENSG00000196449	829.282443311884	0.390485019147787	0.0737107598478363	5.29753078049771	1.17379123515526e-07	5.3080936472115e-07	yrdC N6-threonylcarbamoyltransferase domain containing	YRDC	5252	chr1
ENSG00000197982	2252.24885105662	-0.0195653722854361	0.0611056477162971	-0.320189262640251	0.74882486226254	0.809392004012261	chromosome 1 open reading frame 122	C1orf122	1654	chr1
ENSG00000188786	620.840122275032	0.514615397999126	0.0960123669331572	5.35988658999935	8.32742119766636e-08	3.82378799584647e-07	metal regulatory transcription factor 1	MTF1	50054	chr1
ENSG00000204084	826.52397675051	0.0393244620387296	0.0717245439364071	0.548270646009207	0.583506079909169	0.670440778499295	inositol polyphosphate-5-phosphatase B	INPP5B	17311	chr1
ENSG00000183431	3015.931437942	0.187589723748154	0.0498409050191216	3.76377041460594	0.000167370555230042	0.000497036604325007	splicing factor 3a subunit 3	SF3A3	33110	chr1
ENSG00000183386	104.998163185457	1.24308273572472	0.168417419353957	7.38096296982307	1.57148714903198e-13	1.19352914979354e-12	four and a half LIM domains 3	FHL3	8746	chr1
ENSG00000183520	1734.81551244299	0.0313125078377353	0.0530496477759285	0.590249118523714	0.555023646147258	0.645499598429858	UTP11, small subunit processome component homolog (S. cerevisiae)	UTP11	12114	chr1
ENSG00000116954	1007.70300605463	0.0523776927572226	0.0692738140052283	0.756096564183251	0.449591301803854	0.546715827191367	Ras related GTP binding C	RRAGC	21627	chr1
ENSG00000214114	118.280969141674	0.247879824163873	0.161709892839433	1.53286740725257	0.125308527880969	0.190921010984875	MYC binding protein	MYCBP	10889	chr1
ENSG00000158315	18.5123062568048	0.99371464071326	0.311858028282821	3.18643276937565	0.00144038960256415	0.00360741351643615	rhomboid like 2	RHBDL2	55978	chr1
ENSG00000174574	5600.6430504887	0.310402555284603	0.041670475156736	7.44898046199569	9.40642992883327e-14	7.29037361114056e-13	akirin 1	AKIRIN1	14822	chr1
ENSG00000168653	3905.86313763116	0.114482613900189	0.0535100449822468	2.13946024411251	0.0323984123746638	0.0591963164131985	NADH:ubiquinone oxidoreductase subunit S5	NDUFS5	8342	chr1
ENSG00000127603	38222.1938519603	0.00333154292800428	0.0587773526753319	0.056680724400888	0.954799529026474	0.967790938989344	microtubule-actin crosslinking factor 1	MACF1	73264	chr1
ENSG00000090621	1853.92309721147	-0.323174760107092	0.0537199877399679	-6.01591276735621	1.78875883461157e-09	9.73486000360898e-09	poly(A) binding protein cytoplasmic 4	PABPC4	16037	chr1
ENSG00000116983	85.0710252593944	-1.27591993131465	0.186501692143277	-6.84133166113282	7.84603672750847e-12	5.20411529534045e-11	hippocalcin like 4	HPCAL4	12445	chr1
ENSG00000084072	1202.90447742746	0.0916464692449732	0.0675182357306345	1.35735876764611	0.174667242748689	0.251927367115901	peptidylprolyl isomerase E	PPIE	17925	chr1
ENSG00000116985	21.0896322367094	-0.536953847708607	0.302431246958263	-1.7754575729495	0.075822365008853	0.124023852131393	bone morphogenetic protein 8b	BMP8B	30631	chr1
ENSG00000043514	599.322694951006	0.368452557562288	0.0885776870538611	4.15965430818084	3.18729628938706e-05	0.000105777451499682	tRNA isopentenyltransferase 1	TRIT1	13035	chr1
ENSG00000116990	247.024763295447	0.0287418090998222	0.126144009301863	0.227849180146502	0.819763491873968	0.864452052081539	v-myc avian myelocytomatosis viral oncogene lung carcinoma derived homolog	MYCL	6592	chr1
ENSG00000168389	644.120334216107	1.38814208947641	0.089272669360061	15.5494632279635	1.60444874332754e-54	4.80134714750047e-53	major facilitator superfamily domain containing 2A	MFSD2A	14845	chr1
ENSG00000131236	9783.86218515436	0.0126225305160371	0.0424928435581291	0.297050737467588	0.766427773451631	0.822325976188623	adenylate cyclase associated protein 1	CAP1	32067	chr1
ENSG00000131238	7445.68018766864	-0.148261662735602	0.0388785822091657	-3.81345343145382	0.000137038356876335	0.00041335821409715	palmitoyl-protein thioesterase 1	PPT1	19798	chr1
ENSG00000117000	3310.83954699303	0.0322654371711578	0.0496569120355984	0.649767290161481	0.515842550670907	0.610476163777763	rearranged L-myc fusion	RLF	10118	chr1
ENSG00000084073	3336.63536040199	0.12104883774563	0.0514730535554917	2.35169334990259	0.0186881742769238	0.0363258682509809	zinc metallopeptidase STE24	ZMPSTE24	36135	chr1
ENSG00000049089	449.817916240499	0.451193325291013	0.111883133569767	4.0327197754938	5.51350110067449e-05	0.000176012270150322	collagen type IX alpha 2 chain	COL9A2	16898	chr1
ENSG00000084070	653.616141480465	-0.357533623077449	0.0791926689662951	-4.51473132228461	6.33970887954462e-06	2.31277996504356e-05	small ArfGAP2	SMAP2	9354	chr1
ENSG00000187801	142.656612949556	-0.271122966694026	0.146213976240397	-1.85428899251231	0.0636978260713259	0.106568875179658	ZFP69 zinc finger protein B	ZFP69B	13054	chr1
ENSG00000187815	454.03197419126	-0.0524957811772677	0.0968237312579904	-0.542178869737945	0.587695290243533	0.674037551376684	ZFP69 zinc finger protein	ZFP69	18714	chr1
ENSG00000164002	402.256502055576	-0.0804634599054658	0.101275696054337	-0.794499204056768	0.426904872140097	0.525331933426066	exonuclease 5	EXO5	7754	chr1
ENSG00000117010	279.592270247362	0.000686410061523065	0.113967733059148	0.00602284561689775	0.995194493523222	0.996760271886771	zinc finger protein 684	ZNF684	16609	chr1
ENSG00000117016	380.036296710797	-0.127634673677273	0.0978989013347861	-1.30373959193678	0.192322385361099	0.273171907401845	regulating synaptic membrane exocytosis 3	RIMS3	44973	chr1
ENSG00000066136	1071.22175994629	0.213374870508908	0.0685978149012529	3.11051993151769	0.0018675829133787	0.00457904389038318	nuclear transcription factor Y subunit gamma	NFYC	75674	chr1
ENSG00000117013	14.7645616374935	-0.764659429661841	0.31563307196336	-2.42262138408173	0.0154089769421008	0.0306668640150805	potassium voltage-gated channel subfamily Q member 4	KCNQ4	56441	chr1
ENSG00000179862	38.1332006185953	0.163355889890984	0.247019548966782	0.661307538509638	0.508415107972165	0.603726775237424	Cbp/p300 interacting transactivator with Glu/Asp rich carboxy-terminal domain 4	CITED4	1291	chr1
ENSG00000171793	1469.93673519906	-0.064456346417436	0.0591206062388959	-1.09025178390389	0.275602248087589	0.367881193715849	CTP synthase 1	CTPS1	33229	chr1
ENSG00000281207	12.0217910355495	-0.2737413837754	0.324798492035816	-0.842803739819131	0.399338216080801	0.497618268192154	SLFNL1 antisense RNA 1	SLFNL1-AS1	29301	chr1
ENSG00000010803	780.774134996788	-0.0881345448553458	0.070596739532726	-1.24842231296659	0.211876441944363	0.296482067298261	sex comb on midleg homolog 1 (Drosophila)	SCMH1	214945	chr1
ENSG00000127124	356.739780805832	0.188390269588815	0.129311339014469	1.45687355049147	0.145151288335088	0.215709231020045	human immunodeficiency virus type I enhancer binding protein 3	HIVEP3	188737	chr1
ENSG00000198815	1949.05763755493	-0.0379297870433131	0.0536566173297699	-0.706898588298982	0.479629501337158	0.576139563103774	forkhead box J3	FOXJ3	158427	chr1
ENSG00000177181	448.223628293934	-0.940236553417646	0.108693346309926	-8.65035979973119	5.133731478788e-18	5.1687929087294e-17	ribosomal modification protein rimK like family member A	RIMKLA	43433	chr1
ENSG00000066185	24.7481108537755	0.673111071850805	0.273603353525124	2.46017113159761	0.0138870780304599	0.0279508066226555	zinc finger MYND-type containing 12	ZMYND12	25938	chr1
ENSG00000127125	541.961367901485	0.621335301102557	0.0891814440254288	6.9670917295911	3.23559720386911e-12	2.20294306466636e-11	phosphopantothenoylcysteine synthetase	PPCS	3914	chr1
ENSG00000186409	162.688323456058	0.167006475331806	0.145264738497616	1.14966974820629	0.250279918749169	0.33989277536074	coiled-coil domain containing 30	CCDC30	84417	chr1
ENSG00000171960	534.728899714521	-0.299366834731397	0.0868419372981929	-3.44726112803597	0.000566300940982582	0.00153108970626662	peptidylprolyl isomerase H	PPIH	18382	chr1
ENSG00000065978	26368.7540853643	-0.141309486834114	0.0351085991440845	-4.02492523994433	5.69934186247851e-05	0.000181696523523814	Y-box binding protein 1	YBX1	19955	chr1
ENSG00000117385	868.500657016532	-0.124363314269377	0.0776522705499131	-1.60154124777896	0.109257091785825	0.169902905891681	prolyl 3-hydroxylase 1	P3H1	20750	chr1
ENSG00000164008	35.2134035279281	0.202878259125124	0.242126804838363	0.837900864633966	0.402086383132144	0.500419425554579	chromosome 1 open reading frame 50	C1orf50	8498	chr1
ENSG00000274386	18.6228702004188	-0.15388600037089	0.295985197433234	-0.519911136453378	0.603125513086197	0.687791939644344	uncharacterized LOC100129924	LOC100129924	10241	chr1
ENSG00000177868	597.636846587879	0.0546289295620208	0.0803876976754964	0.67956828148684	0.496777859066029	0.592823271661532	small vasohibin binding protein	SVBP	10337	chr1
ENSG00000164010	890.540350338413	-0.0608186709319656	0.0696675338544666	-0.872984409911997	0.382671575341612	0.480354090128747	erythroblast membrane associated protein (Scianna blood group)	ERMAP	22609	chr1
ENSG00000164011	387.729979239519	0.094161519267036	0.100083786328227	0.940826908348882	0.34679356902076	0.444237074374439	zinc finger protein 691	ZNF691	5903	chr1
ENSG00000117394	2400.79029947451	0.116228573142689	0.0547452764025379	2.12307948338902	0.033747191935213	0.0613246948297208	solute carrier family 2 member 1	SLC2A1	33802	chr1
ENSG00000227533	45.7636798963427	-0.132382716646062	0.230112614759421	-0.575295347386609	0.565091567591108	0.653950372179266	SLC2A1 antisense RNA 1	SLC2A1-AS1	24310	chr1
ENSG00000117395	1715.11400144974	-0.0161286336745488	0.0609224700990452	-0.264740310895594	0.791209521492157	0.841884922390037	EBNA1 binding protein 2	EBNA1BP2	8142	chr1
ENSG00000243710	14.3180369334033	0.421540714077508	0.316196606138521	1.33316014749645	0.182479254454981	0.261257611801473	cilia and flagella associated protein 57	CFAP57	38549	chr1
ENSG00000117399	1365.93920027628	-0.738590531463002	0.0647430822653184	-11.4080223804644	3.81299791685205e-30	6.37243864266264e-29	cell division cycle 20	CDC20	4248	chr1
ENSG00000066322	1165.78578871688	-0.0460165491677734	0.0635991542294781	-0.723540269132145	0.469348023202657	0.566412672550902	ELOVL fatty acid elongase 1	ELOVL1	4678	chr1
ENSG00000159479	883.314039157962	0.190920539747655	0.0736414630846602	2.59256853069537	0.00952621999438416	0.0199127946730432	mediator complex subunit 8	MED8	5905	chr1
ENSG00000198198	1347.76888348992	0.0648756865628813	0.0693262917479584	0.93580205903328	0.349375111170872	0.446889983738064	seizure threshold 2 homolog (mouse)	SZT2	64363	chr1
ENSG00000178922	754.392132968257	-0.444971084555286	0.0794192752790246	-5.60280968306452	2.10904758316238e-08	1.02881265768684e-07	hydroxypyruvate isomerase (putative)	HYI	2987	chr1
ENSG00000142949	5314.5835757606	-0.226671947069449	0.0448613972220595	-5.0527170597796	4.35568907550524e-07	1.84964904495e-06	protein tyrosine phosphatase, receptor type F	PTPRF	49190	chr1
ENSG00000066135	5368.56053867928	0.219355251344192	0.0514754807273147	4.26135410966243	2.03191978963403e-05	6.94074064727427e-05	lysine demethylase 4A	KDM4A	55393	chr1
ENSG00000126091	1176.31796576859	-0.00180521002962029	0.0660682620480628	-0.0273234072406363	0.978201787558006	0.984316427270432	ST3 beta-galactoside alpha-2,3-sialyltransferase 3	ST3GAL3	223634	chr1
ENSG00000117408	2470.29957384527	-0.127711449168902	0.0526072763231742	-2.42763849594403	0.015197483101679	0.0302976157777956	importin 13	IPO13	21217	chr1
ENSG00000132768	663.742255104828	0.39851654416698	0.0780886335591546	5.10338734337169	3.33627152895473e-07	1.43811889082828e-06	DPH2 homolog	DPH2	3391	chr1
ENSG00000117410	4179.00240451125	0.144194755873019	0.0597677724134582	2.41258373953636	0.0158398983267921	0.0314128824790035	ATPase H+ transporting V0 subunit b	ATP6V0B	3371	chr1
ENSG00000117411	3865.85347213412	-0.0761282336077416	0.0595990237846023	-1.27734027796962	0.201482139456916	0.284250766907838	beta-1,4-galactosyltransferase 2	B4GALT2	11236	chr1
ENSG00000159214	230.256950668565	0.286228795891198	0.124445335656455	2.30003635235767	0.0214461606202325	0.0411894513832084	coiled-coil domain containing 24	CCDC24	4680	chr1
ENSG00000196517	5281.08824680781	0.0899701807406005	0.0689493828311292	1.30487289438044	0.191936132412197	0.272733921918914	solute carrier family 6 member 9	SLC6A9	35010	chr1
ENSG00000171872	33.811943044049	-0.00369017056970291	0.246535997511402	-0.0149680801463172	0.988057645882375	0.991461016970519	Kruppel like factor 17	KLF17	81839	chr1
ENSG00000178028	838.590274498259	0.257321263606187	0.0696777661889554	3.69301827082647	0.000221608094568265	0.000645511931037553	DNA methyltransferase 1 associated protein 1	DMAP1	2316	chr1
ENSG00000117419	2472.0447917897	-0.0242277948601251	0.0534881562416967	-0.452956253542318	0.650580242690196	0.727920132529855	ERI1 exoribonuclease family member 3	ERI3	134198	chr1
ENSG00000187147	1712.78948974112	0.122616963272426	0.053948778432553	2.27284040222936	0.0230357993430422	0.0438814431174246	ring finger protein 220	RNF220	246437	chr1
ENSG00000126106	570.51939782591	0.00559755518799056	0.0851355500844242	0.0657487404784461	0.947577867043927	0.962770460530339	transmembrane protein 53	TMEM53	20097	chr1
ENSG00000198520	31.8044835754122	0.382282777236877	0.259626805443582	1.47243184918342	0.140904297870279	0.2104473383463	chromosome 1 open reading frame 228	C1orf228	50870	chr1
ENSG00000142945	1844.13191661579	-0.308001807351472	0.0611163795182237	-5.03959510984502	4.66517746642549e-07	1.97627980693554e-06	kinesin family member 2C	KIF2C	27949	chr1
ENSG00000142937	20919.98083861	-0.287705403956628	0.0426879312692563	-6.73973639392154	1.58674240998075e-11	1.02359868501983e-10	ribosomal protein S8	RPS8	3167	chr1
ENSG00000173846	281.937818530238	0.36883810354409	0.110948700944913	3.32440218229525	0.00088608311362534	0.00230962106948127	polo like kinase 3	PLK3	5632	chr1
ENSG00000222009	31.1694596766069	0.33067569962793	0.255769592301374	1.29286556956424	0.19605755750036	0.277632567521996	BTB domain containing 19	BTBD19	5018	chr1
ENSG00000117425	25.3840762665261	-0.483926602436702	0.271491971758587	-1.78247113276342	0.0746724346405109	0.122400216191521	patched 2	PTCH2	23101	chr1
ENSG00000070785	985.369055179685	-0.276317500345599	0.074542820084444	-3.70682917593646	0.000209870399082321	0.000613618985208332	eukaryotic translation initiation factor 2B subunit gamma	EIF2B3	112194	chr1
ENSG00000126107	843.29651701936	-0.128736819459933	0.098442997173391	-1.30772958114211	0.1909650462664	0.271533282609104	HECT domain E3 ubiquitin protein ligase 3	HECTD3	8808	chr1
ENSG00000126088	3198.16737184698	-0.0463623487551954	0.0607203905420762	-0.763538382103597	0.445142381052854	0.542861289328215	uroporphyrinogen decarboxylase	UROD	2028	chr1
ENSG00000162415	165.769881852483	-0.353103025195791	0.141202948450649	-2.50067742260497	0.0123956026174604	0.0252326184095251	zinc finger SWIM-type containing 5	ZSWIM5	190175	chr1
ENSG00000281912	22.6902298918478	-0.213734990961111	0.279862454249868	-0.763714416547936	0.445037447670997	0.542780584745477	long intergenic non-protein coding RNA 1144	LINC01144	1710	chr1
ENSG00000186603	22.0643928451948	0.384319554559721	0.285924871702133	1.3441277503137	0.17890707988202	0.256983964486942	4-hydroxyphenylpyruvate dioxygenase like	HPDL	1802	chr1
ENSG00000132781	598.422590045308	0.024695974807685	0.0845052513711745	0.292241895112675	0.770101681365145	0.82538257040781	mutY DNA glycosylase	MUTYH	11229	chr1
ENSG00000132773	447.733777245526	0.206912602230586	0.0910996738936251	2.27127709010455	0.0231302092113313	0.0440253574347235	target of EGR1, member 1 (nuclear)	TOE1	4309	chr1
ENSG00000070759	96.15326059588	3.20373133915175	0.216661240199317	14.7868226739794	1.78168049462977e-49	4.83574328048256e-48	testis-specific kinase 2	TESK2	147286	chr1
ENSG00000280670	63.6646359866516	-0.032798262588043	0.194897092535873	-0.168285027556305	0.86635905216305	0.901572189444458	coiled-coil domain containing 163	CCDC163	6154	chr1
ENSG00000132763	464.821365851642	-0.265818258014267	0.0976336918146854	-2.7226078730978	0.00647688842974999	0.0140503132680683	methylmalonic aciduria (cobalamin deficiency) cblC type, with homocystinuria	MMACHC	10884	chr1
ENSG00000117450	10211.0074781204	-0.00994784486111059	0.0413667426767646	-0.240479288853899	0.809958717341567	0.857016608973153	peroxiredoxin 1	PRDX1	10904	chr1
ENSG00000117448	3344.9525988389	-0.0488994403048027	0.0506943494675888	-0.964593506344653	0.334748453177982	0.431570660660742	aldo-keto reductase family 1 member A1	AKR1A1	19269	chr1
ENSG00000132780	4457.65878479279	0.150441380352237	0.129113157095262	1.16519016138098	0.243942027246702	0.333048166464229	nuclear autoantigenic sperm protein	NASP	7444	chr1
ENSG00000159588	22.3001504944043	0.121219259686337	0.279587756756008	0.433564262944902	0.664604890703813	0.739652852376581	coiled-coil domain containing 17	CCDC17	4016	chr1
ENSG00000159592	3215.03671022325	0.117406716402098	0.0500388588558847	2.3463108289547	0.0189602882001544	0.0368241348277856	GC-rich promoter binding protein 1 like 1	GPBP1L1	59327	chr1
ENSG00000159596	648.618699764754	-0.00435378289602919	0.0773534025133976	-0.0562843101216538	0.955115317729159	0.967970911411598	transmembrane protein 69	TMEM69	6262	chr1
ENSG00000197429	850.365725783036	-0.560554551052026	0.075354988177567	-7.43885129052281	1.0156457739974e-13	7.84474246590551e-13	intracisternal A particle-promoted polypeptide	IPP	56488	chr1
ENSG00000086015	1786.09131353211	-0.28719801849272	0.0588513690049486	-4.88005671488408	1.06055337370112e-06	4.30648013878925e-06	microtubule associated serine/threonine kinase 2	MAST2	166913	chr1
ENSG00000117461	7958.47371247588	0.232480962842326	0.0430482374187017	5.40047576352865	6.64643908026066e-08	3.08631894293934e-07	phosphoinositide-3-kinase regulatory subunit 3	PIK3R3	92569	chr1
ENSG00000085998	5772.1105145994	-0.011279439000238	0.0434166350276829	-0.259795329441035	0.795021653857599	0.845133695642888	protein O-linked mannose N-acetylglucosaminyltransferase 1 (beta 1,2-)	POMGNT1	31625	chr1
ENSG00000171357	96.9196104118998	-0.630286534995648	0.177787263030942	-3.54517260826469	0.00039235606196119	0.00109373938052677	leucine rich adaptor protein 1	LURAP1	17923	chr1
ENSG00000085999	297.942738283979	-0.497817289209424	0.107424854007223	-4.63409788926455	3.58497337992506e-06	1.35842944225786e-05	RAD54-like (S. cerevisiae)	RAD54L	30779	chr1
ENSG00000132128	5067.35336938056	0.243479381752369	0.040778863077383	5.97072511046561	2.36201428122168e-09	1.26791912642812e-08	leucine rich repeat containing 41	LRRC41	24967	chr1
ENSG00000173660	3426.50586900883	-0.172156582568873	0.0450545835883542	-3.8210670004588	0.00013287554416898	0.000401493418788903	ubiquinol-cytochrome c reductase hinge protein	UQCRH	13068	chr1
ENSG00000117481	809.320415733687	0.575230770343602	0.0750869559969465	7.66086149992543	1.84689948221012e-14	1.51173741954136e-13	NOP2/Sun RNA methyltransferase family member 4	NSUN4	24976	chr1
ENSG00000117480	245.412168115085	-0.283911755421849	0.121868311662124	-2.32966020083207	0.0198241176249405	0.03835007275112	fatty acid amide hydrolase	FAAH	19582	chr1
ENSG00000079277	442.063981438587	0.526499462141442	0.0980115586248992	5.37180991230241	7.79502570163944e-08	3.59227821492137e-07	MAP kinase interacting serine/threonine kinase 1	MKNK1	46888	chr1
ENSG00000142961	619.097478444034	2.02677697166469	0.0885903727856541	22.8780725030756	7.68214086068528e-116	4.33824124007651e-114	MOB kinase activator 3C	MOB3C	9177	chr1
ENSG00000123472	3015.18437968888	-0.0223485914694747	0.0498251729119708	-0.448540168821075	0.653763403023495	0.730431309082094	ATP synthase mitochondrial F1 complex assembly factor 1	ATPAF1	30840	chr1
ENSG00000159658	3964.94531395819	-0.240151427972394	0.157056375479836	-1.52907786925992	0.126245140931785	0.192118135254769	EF-hand calcium binding domain 14	EFCAB14	43906	chr1
ENSG00000123473	936.801754291327	-0.216220058989633	0.0678049203722459	-3.18885499463158	0.00142837508096329	0.0035811659521824	SCL/TAL1 interrupting locus	STIL	63018	chr1
ENSG00000162368	5733.942963415	0.0526210901660742	0.0498962885464115	1.05460930460045	0.291604046552862	0.385602367290419	cytidine/uridine monophosphate kinase 1	CMPK1	45043	chr1
ENSG00000132122	2528.50535590924	0.0593708111046729	0.0596428451498352	0.995438949223852	0.319522823128741	0.415846876787604	spermatogenesis associated 6	SPATA6	176833	chr1
ENSG00000162373	199.412135052858	-0.390626979034235	0.128278329560493	-3.04515174443415	0.00232562939712828	0.00559533408465582	BEN domain containing 5	BEND5	49008	chr1
ENSG00000162374	228.692471866861	0.0468597336805418	0.120298321357694	0.389529406160285	0.696884561991124	0.766742736325375	ELAV like RNA binding protein 4	ELAVL4	92947	chr1
ENSG00000185104	2066.89552001717	-0.148928134567099	0.0514165665591903	-2.89650096327716	0.00377349483818886	0.00865364257554199	Fas associated factor 1	FAF1	518591	chr1
ENSG00000123080	653.272976352259	-0.143276117255435	0.0778191084953015	-1.84114313342572	0.0656005861702152	0.10937335825165	cyclin dependent kinase inhibitor 2C	CDKN2C	6702	chr1
ENSG00000123091	4924.05462323964	0.118057105429588	0.0431564167354314	2.73556319917227	0.00622736269136695	0.013574867225884	ring finger protein 11	RNF11	37175	chr1
ENSG00000085831	83.1224138652631	0.321566250654132	0.191569603472897	1.67858702437429	0.0932325571413235	0.148411225592661	tetratricopeptide repeat domain 39A	TTC39A	35009	chr1
ENSG00000085832	3936.08460091983	-0.150363185118771	0.0474092506208516	-3.17160012338685	0.00151601598362869	0.00378126515596079	epidermal growth factor receptor pathway substrate 15	EPS15	67859	chr1
ENSG00000117859	5007.90013493335	0.13992010941522	0.0436443058395784	3.20591900188581	0.0013463187953503	0.00339000264812674	oxysterol binding protein like 9	OSBPL9	212041	chr1
ENSG00000169213	112.435650385261	-0.70362359532829	0.183616826726679	-3.83202132327263	0.000127094720475185	0.000385273064990252	RAB3B, member RAS oncogene family	RAB3B	82809	chr1
ENSG00000117862	2106.76516030438	-0.0149437177138891	0.0496405775153664	-0.301038353336305	0.763385248491505	0.820003866016531	thioredoxin domain containing 12	TXNDC12	36040	chr1
ENSG00000198841	302.556010595722	0.391032438924	0.114562445845845	3.41326894722703	0.000641885620250986	0.00171754071677781	KTI12 chromatin associated homolog	KTI12	1696	chr1
ENSG00000134717	2484.60466968386	-0.23055555802884	0.0547735431328984	-4.2092503942905	2.56219319398056e-05	8.61891363113043e-05	basic transcription factor 3 like 4	BTF3L4	34532	chr1
ENSG00000157077	1930.84627613398	-0.269105369180031	0.0536432292390292	-5.01657661176442	5.26003071901772e-07	2.21287864883879e-06	zinc finger FYVE-type containing 9	ZFYVE9	121954	chr1
ENSG00000154222	1464.87803527701	0.0843657529176517	0.0584023731896726	1.44456035448522	0.148581415450642	0.21998971597275	coiled-coil and C2 domain containing 1B	CC2D1B	5930	chr1
ENSG00000085840	598.276896455802	-0.319300880357932	0.0948969755877386	-3.36471081802514	0.000766239220715099	0.00201877238172499	origin recognition complex subunit 1	ORC1	31643	chr1
ENSG00000134748	2292.0910876415	-0.0310410430889936	0.0501260480533858	-0.619259732104432	0.53574526738918	0.628591052293488	pre-mRNA processing factor 38A	PRPF38A	13774	chr1
ENSG00000134744	1460.68083698657	0.00311241458618798	0.0802173850637116	0.0387997512473884	0.96905004316241	0.97841149552949	zinc finger CCHC-type containing 11	ZCCHC11	107194	chr1
ENSG00000116157	1463.14619015529	0.118237428134738	0.0616335793669536	1.91839301480086	0.0550611961048657	0.093903074945037	glutathione peroxidase 7	GPX7	6681	chr1
ENSG00000162377	1384.12870446521	0.134743061302449	0.0654677267452848	2.05816007369086	0.0395747698751542	0.0705864304765073	cytochrome c oxidase assembly factor 7 (putative)	COA7	12025	chr1
ENSG00000162378	6607.04684255502	-0.281049388141984	0.0467164798210647	-6.0160651919509	1.7870762559227e-09	9.73473471964114e-09	zyg-11 family member B, cell cycle regulator	ZYG11B	100883	chr1
ENSG00000203995	13.871868902696	-0.59830268235488	0.316012526251551	-1.89328786884423	0.0583195975396722	0.098524241681919	zyg-11 family member A, cell cycle regulator	ZYG11A	52065	chr1
ENSG00000121310	86.5023974390274	-0.203720020349451	0.176339015955391	-1.15527479409881	0.247977914506462	0.337439826337253	enoyl-CoA hydratase domain containing 2	ECHDC2	26010	chr1
ENSG00000116171	7018.41727787956	0.0256511969297684	0.0478238598150792	0.536368185858567	0.591704114325773	0.677470251891143	sterol carrier protein 2	SCP2	124389	chr1
ENSG00000174348	21.8644980789698	0.446970168704413	0.283881796210435	1.57449394315191	0.115373300698884	0.177951880648444	podocan	PODN	23451	chr1
ENSG00000157184	1361.62093400499	0.0513208135453014	0.0612865335150296	0.837391358294327	0.40237262164822	0.500731168134292	carnitine palmitoyltransferase 2	CPT2	17769	chr1
ENSG00000162384	1518.27141104637	0.0164809160865521	0.0611695684295207	0.269429987977458	0.787598812010215	0.839382190259726	chromosome 1 open reading frame 123	C1orf123	6518	chr1
ENSG00000162385	225.07302600659	0.118125025349741	0.143005354173879	0.826018200731932	0.408793767253558	0.506785581161908	mago homolog, exon junction complex core component	MAGOH	11719	chr1
ENSG00000226754	18.6450464605458	-0.337687267968234	0.302648509195864	-1.11577376959652	0.264518984359532	0.355356199132398	uncharacterized LOC100507564	LOC100507564	4174	chr1
ENSG00000157193	2844.97146330223	0.788116133816174	0.0467564096220486	16.8557881194652	9.5131466949261e-64	3.3644348349101e-62	LDL receptor related protein 8	LRP8	85031	chr1
ENSG00000058804	3118.06095180304	-0.5635220428442	0.0513884019536027	-10.9659382549586	5.57195901208244e-28	8.79766470847966e-27	NDC1 transmembrane nucleoporin	NDC1	73092	chr1
ENSG00000058799	1185.11231197013	0.285910682142337	0.0746992574430401	3.82749028476421	0.000129456492092694	0.000391754142557947	Yip1 domain family member 1	YIPF1	38096	chr1
ENSG00000081870	636.37999531586	0.0907328905163973	0.0839514968801083	1.08077751902356	0.279796090880017	0.372520605834646	heat shock protein family B (small) member 11	HSPB11	24055	chr1
ENSG00000116212	1423.33645406366	0.242285745660404	0.0587340072811963	4.12513562203292	3.70516356834069e-05	0.000121505009703975	leucine rich repeat containing 42	LRRC42	21843	chr1
ENSG00000116209	4945.93554112519	0.27759840930465	0.047187541874955	5.8828749766257	4.0320049988597e-09	2.11175130923822e-08	transmembrane protein 59	TMEM59	16338	chr1
ENSG00000215883	267.576359013676	-0.258864000234564	0.122127600998893	-2.11961913701154	0.0340381772839198	0.0617813210032786	cytochrome b5 reductase like	CYB5RL	27720	chr1
ENSG00000116221	1598.62986784237	-0.0648646251786782	0.0585995357338674	-1.1069136361978	0.268331269653821	0.359408897427482	mitochondrial ribosomal protein L37	MRPL37	18217	chr1
ENSG00000157216	215.492864880006	-0.113043981436482	0.122649412714656	-0.921683837977109	0.35669351325991	0.45409441443551	single stranded DNA binding protein 3	SSBP3	180965	chr1
ENSG00000162390	19.2143827125309	0.277098255780895	0.30240739811745	0.916307793744103	0.359505481378981	0.456719363816457	acyl-CoA thioesterase 11	ACOT11	86611	chr1
ENSG00000243725	38.4036901342514	-0.0487684326597691	0.23633129679827	-0.20635621824306	0.836512667557111	0.878542175413374	tetratricopeptide repeat domain 4	TTC4	26834	chr1
ENSG00000162396	428.753916298146	0.118104668903399	0.0942954411263185	1.25249606441933	0.210389161490368	0.294767927838396	prolyl-tRNA synthetase 2, mitochondrial (putative)	PARS2	7656	chr1
ENSG00000116133	16624.6451450218	0.158025732209584	0.051600325176526	3.06249489066152	0.00219500222667257	0.00532431528895042	24-dehydrocholesterol reductase	DHCR24	37182	chr1
ENSG00000169174	10.6912129640577	0.0115260836213002	0.332780375711116	0.0346357070986238	0.972370228424573	0.980241230554392	proprotein convertase subtilisin/kexin type 9	PCSK9	25378	chr1
ENSG00000162402	11242.0748356871	-0.249046681302462	0.0454234750430563	-5.48277473413019	4.18706038224435e-08	1.98040461510747e-07	ubiquitin specific peptidase 24	USP24	148732	chr1
ENSG00000162407	8301.76874818064	0.186843712814976	0.037939035788083	4.92484083830263	8.44290463402004e-07	3.46144260537033e-06	phospholipid phosphatase 3	PLPP3	84839	chr1
ENSG00000162409	516.730664748324	-0.566735749097529	0.0980184448633099	-5.78192961424619	7.38486073935244e-09	3.77601221813183e-08	protein kinase AMP-activated catalytic subunit alpha 2	PRKAA2	70019	chr1
ENSG00000187889	18.7583999773332	1.92726684152065	0.317257819238796	6.07476545777434	1.24169070523387e-09	6.84640879007886e-09	chromosome 1 open reading frame 168	C1orf168	43210	chr1
ENSG00000173406	227.514821588099	-0.358275144249936	0.129014762394039	-2.77700890659075	0.0054861675606548	0.0121322874920212	DAB1, reelin adaptor protein	DAB1	293260	chr1
ENSG00000162600	508.303779140023	0.0219567754211975	0.0905895459570144	0.242376481626436	0.808488456100945	0.856218919515418	OMA1 zinc metallopeptidase	OMA1	65479	chr1
ENSG00000162601	735.225170792444	0.0762794592374941	0.0865843898572	0.880983966778523	0.378326498051493	0.475710415264066	Myb like, SWIRM and MPN domains 1	MYSM1	14168	chr1
ENSG00000177606	2495.45152580659	0.460564683538089	0.0614530069353959	7.49458336550187	6.65092849839909e-14	5.21243724790595e-13	Jun proto-oncogene, AP-1 transcription factor subunit	JUN	3323	chr1
ENSG00000172456	517.109836789058	-0.0936441561894298	0.0883878766905011	-1.05946833090396	0.289386544634217	0.383430327114684	FGGY carbohydrate kinase domain containing	FGGY	452653	chr1
ENSG00000134716	99.1213555561225	1.47542856318391	0.18058589185094	8.17023161699565	3.07797948835939e-16	2.80280251849631e-15	cytochrome P450 family 2 subfamily J member 2	CYP2J2	33444	chr1
ENSG00000162599	6723.49607889883	-0.414426221466857	0.140470151157887	-2.9502796006893	0.0031748647085474	0.00741300727198486	nuclear factor I A	NFIA	380927	chr1
ENSG00000162604	1168.51659003791	0.101899819950341	0.0657416415105123	1.55000419230552	0.121140509778594	0.18547860931991	TM2 domain containing 1	TM2D1	44377	chr1
ENSG00000132849	421.195381624285	-0.33946153659665	0.0984444691241535	-3.44825402195564	0.00056422312615713	0.00152576653443341	PATJ, crumbs cell polarity complex component	PATJ	165081	chr1
ENSG00000162607	3860.19362625814	-0.248877939525488	0.0476339144994425	-5.22480552230072	1.74338246192195e-07	7.74867387471181e-07	ubiquitin specific peptidase 1	USP1	15501	chr1
ENSG00000116641	7780.84152083061	-0.123062151153963	0.0452175025020265	-2.72156011156185	0.00649745669995154	0.0140905669065998	dedicator of cytokinesis 7	DOCK7	233643	chr1
ENSG00000125703	491.952472720554	-0.475177839811215	0.0925705103356911	-5.13314486533631	2.84940416768532e-07	1.23854454898923e-06	autophagy related 4C cysteine peptidase	ATG4C	81165	chr1
ENSG00000088035	595.211248119152	-0.141813516115075	0.0827990365203407	-1.71274355445231	0.0867597285608446	0.139422834021185	ALG6, alpha-1,3-glucosyltransferase	ALG6	70973	chr1
ENSG00000142856	466.804111302739	-0.156112490654806	0.0950786910191202	-1.64192932171744	0.100604652364664	0.158204374171022	integrin subunit beta 3 binding protein	ITGB3BP	82504	chr1
ENSG00000203965	657.646331649387	-0.0135974658953095	0.0803822911658076	-0.169159969168601	0.865670815936898	0.900994942546488	EF-hand calcium binding domain 7	EFCAB7	49352	chr1
ENSG00000079739	2317.1018767046	-0.696608082414584	0.049894145799329	-13.9617197820421	2.66914434206502e-44	6.50110721923837e-43	phosphoglucomutase 1	PGM1	37030	chr1
ENSG00000185483	577.87720196627	-0.797621206396783	0.0926000063900935	-8.61361934508586	7.07894625439107e-18	7.09668162439134e-17	receptor tyrosine kinase like orphan receptor 1	ROR1	369363	chr1
ENSG00000158966	2850.2370063164	0.230235012098505	0.0510715509175612	4.50808733946902	6.54146493674355e-06	2.38141971507911e-05	cache domain containing 1	CACHD1	28393	chr1
ENSG00000162437	1220.64643406777	-0.318853613632219	0.0776553867295994	-4.10600767133497	4.02556117068891e-05	0.000131417212576919	ribonucleoprotein, PTB binding 2	RAVER2	55609	chr1
ENSG00000162434	6016.69873491207	-0.0525216268780178	0.0382025486648052	-1.37481997179953	0.169187264769302	0.24543895205035	Janus kinase 1	JAK1	133714	chr1
ENSG00000162433	766.4729793902	-0.708669754267008	0.0985464998042898	-7.19122196804964	6.42139872389256e-13	4.62849660978463e-12	adenylate kinase 4	AK4	84597	chr1
ENSG00000116675	263.096691666598	1.06549329670604	0.116393130478694	9.15426273289453	5.47302416713844e-20	6.1319762768619e-19	DnaJ heat shock protein family (Hsp40) member C6	DNAJC6	151176	chr1
ENSG00000213625	2700.58091954649	0.138358099340588	0.0533193131091954	2.59489650696057	0.00946194051995892	0.0197900951287373	leptin receptor overlapping transcript	LEPROT	15560	chr1
ENSG00000116678	307.290194906478	0.210771159922289	0.107636399263181	1.95817735789298	0.0502092050023095	0.0868981606595828	leptin receptor	LEPR	217046	chr1
ENSG00000184588	7185.503673601	0.0778975886684431	0.0409780980936296	1.90095666447128	0.0573076890434192	0.0971075843984375	phosphodiesterase 4B	PDE4B	582070	chr1
ENSG00000118473	435.170078000504	-0.406408311346278	0.130042782280001	-3.1251892970978	0.00177690672723772	0.00437587105942751	SH3 domain GRB2 like endophilin interacting protein 1	SGIP1	101542	chr1
ENSG00000152760	16.430846526182	-0.374007881286375	0.307125524929935	-1.21776879786106	0.223311844623947	0.309682382806057	Tctex1 domain containing 1	TCTEX1D1	26591	chr1
ENSG00000152763	469.731649697549	0.150679672211806	0.0898669271750019	1.67669772349488	0.093601606015035	0.148914062506028	WD repeat domain 78	WDR78	87289	chr1
ENSG00000198160	2519.33905102882	0.509856933384725	0.0668151111464771	7.63086260931272	2.3318809149025e-14	1.89431509357364e-13	MIER1 transcriptional regulator	MIER1	23346	chr1
ENSG00000116704	2378.93435517009	-0.199439543345778	0.0515014126743637	-3.87250626709615	0.000107721905154511	0.000330047097284823	solute carrier family 35 member D1	SLC35D1	45534	chr1
ENSG00000142864	11595.3399354026	-0.0102822096390509	0.037681691421224	-0.272870172522551	0.784953015589422	0.837390842727746	SERPINE1 mRNA binding protein 1	SERBP1	22631	chr1
ENSG00000116717	852.653453701649	0.994443121681184	0.0718717278889117	13.8363602892398	1.53799215188898e-43	3.6445989995271e-42	growth arrest and DNA damage inducible alpha	GADD45A	3162	chr1
ENSG00000172380	9286.17061969708	0.0816646366887583	0.042546903441706	1.91940259061739	0.0549334033421438	0.0937536331716699	G protein subunit gamma 12	GNG12	132007	chr1
ENSG00000232284	13.956998227668	0.291548249755933	0.318716336382364	0.914757784508925	0.360318801394603	0.457496833075214	GNG12 antisense RNA 1	GNG12-AS1	370700	chr1
ENSG00000162595	323.031099498562	3.45029460127091	0.140960298228609	24.4770665544083	2.59256714414249e-132	1.67322132966432e-130	DIRAS family GTPase 3	DIRAS3	4837	chr1
ENSG00000116729	2220.74559789081	0.314809059586018	0.0600476548716213	5.2426536932885	1.5828344869486e-07	7.06649569324677e-07	wntless Wnt ligand secretion mediator	WLS	107244	chr1
ENSG00000116745	1301.25839772962	0.19527223292989	0.0791167022410283	2.4681543517195	0.0135811743628692	0.0273911789965413	RPE65, retinoid isomerohydrolase	RPE65	21136	chr1
ENSG00000024526	1082.71439263123	-0.716471986103736	0.0708590031402828	-10.1112343435781	4.92596885753525e-24	6.6590920704422e-23	DEP domain containing 1	DEPDC1	22965	chr1
ENSG00000066557	2760.0623222646	-0.288734431210159	0.0520086959061658	-5.55165681775782	2.82974705028186e-08	1.36375111628346e-07	leucine rich repeat containing 40	LRRC40	60877	chr1
ENSG00000116754	5016.65104135682	-0.0973114209955585	0.0548240681461116	-1.77497628844715	0.0759018024389388	0.124110302762094	serine and arginine rich splicing factor 11	SRSF11	21741	chr1
ENSG00000118454	2676.41587045218	-0.153493054118233	0.047390537524383	-3.238896668755	0.0011999303714067	0.00305323852680794	ankyrin repeat domain 13C	ANKRD13C	95733	chr1
ENSG00000197568	42.1075569231769	-0.188826396900998	0.254332073743018	-0.74244036201188	0.45782057265498	0.554747977161533	HERV-H LTR-associating 3	HHLA3	13213	chr1
ENSG00000116761	414.352218908785	-0.258617765994436	0.122699907924461	-2.10772583589591	0.0350547111852684	0.0634290995025431	cystathionine gamma-lyase	CTH	28634	chr1
ENSG00000050628	27.8509825447858	3.35178862395092	0.326746563708084	10.2580684733548	1.08862408313691e-24	1.50653955378779e-23	prostaglandin E receptor 3	PTGER3	95377	chr1
ENSG00000132485	2465.54601653837	0.105030968195542	0.0608434096975373	1.72625052931235	0.0843023511434801	0.135957442165412	zinc finger RANBP2-type containing 2	ZRANB2	17999	chr1
ENSG00000229956	35.4901234234037	0.0222715719723389	0.241429291421167	0.0922488395721908	0.926500335073291	0.947265089261311	ZRANB2 antisense RNA 2 (head to head)	ZRANB2-AS2	156400	chr1
ENSG00000172260	2342.48946472373	-0.276084799749341	0.0589432136851543	-4.68391155636763	2.81451490240043e-06	1.08527756630281e-05	neuronal growth regulator 1	NEGR1	879781	chr1
ENSG00000254685	516.75527808146	0.228226563077625	0.0906539241824375	2.5175585628078	0.0118171322695368	0.0241821402716009	fucose-1-phosphate guanylyltransferase	FPGT	10253	chr1
ENSG00000178965	613.985398641447	3.59417462304175	0.220039727511943	16.3342077527644	5.63596102110485e-60	1.87932462144222e-58	glutamate rich 3	ERICH3	45528	chr1
ENSG00000116791	286.374268040186	-0.060503156105778	0.112982156368003	-0.535510721787859	0.59229674556812	0.677982502793749	crystallin zeta	CRYZ	27921	chr1
ENSG00000162623	162.0381475697	-0.236058250027666	0.141747792144601	-1.66533987200913	0.0958449680191834	0.151874654026552	tRNA-yW synthesizing protein 3 homolog	TYW3	33525	chr1
ENSG00000137968	1520.83059462778	-0.567180616609963	0.0601836816646922	-9.42415952167828	4.33563868384822e-21	5.15455176292821e-20	solute carrier family 44 member 5	SLC44A5	408984	chr1
ENSG00000117054	2684.09357234836	-0.0584413885656527	0.0518056358699179	-1.12808939769405	0.259282166285231	0.349748859868391	acyl-CoA dehydrogenase, C-4 to C-12 straight chain	ACADM	39313	chr1
ENSG00000137955	1688.81661061942	-0.20762238746432	0.0549209086962112	-3.78038878804354	0.000156583651296074	0.000467082861853357	Rab geranylgeranyltransferase beta subunit	RABGGTB	8897	chr1
ENSG00000057468	15.7162207782728	-0.123018475464352	0.307495109685064	-0.400066445252895	0.689107577824531	0.75979779778244	mutS homolog 4	MSH4	116368	chr1
ENSG00000184005	295.438109135024	-0.79721931301827	0.108834807284499	-7.32503996570054	2.38827528521674e-13	1.77347801534785e-12	ST6 N-acetylgalactosaminide alpha-2,6-sialyltransferase 3	ST6GALNAC3	556281	chr1
ENSG00000117069	7018.8265147064	-0.657142954976739	0.0449461564093096	-14.6206707641997	2.07347389928946e-48	5.47905697349979e-47	ST6 N-acetylgalactosaminide alpha-2,6-sialyltransferase 5	ST6GALNAC5	196552	chr1
ENSG00000142892	1551.27245925196	-0.392376498969056	0.0566350139080663	-6.92816107727963	4.26346148274594e-12	2.86790480623712e-11	phosphatidylinositol glycan anchor biosynthesis class K	PIGK	130466	chr1
ENSG00000154027	179.970959257952	-0.625212037667838	0.134293235566685	-4.65557356652848	3.23080017349578e-06	1.23390663839128e-05	adenylate kinase 5	AK5	33084	chr1
ENSG00000036549	3828.27953258396	0.0692443085697555	0.0463223760074674	1.49483499202616	0.134957511564677	0.202888236806803	zinc finger ZZ-type containing 3	ZZZ3	118154	chr1
ENSG00000077254	6272.46642958007	0.366086676306573	0.0405872463096882	9.01974658525154	1.88524895575109e-19	2.05150828479363e-18	ubiquitin specific peptidase 33	USP33	63891	chr1
ENSG00000180488	1122.23281239815	-0.165202550924214	0.0733979913467583	-2.25077754708216	0.0243996303181108	0.0461343084386583	mitoguardin 1	MIGA1	99917	chr1
ENSG00000162614	239.36287061402	-0.218436338112424	0.293114792137516	-0.74522454673643	0.456135985982533	0.552993809183291	nexilin F-actin binding protein	NEXN	53694	chr1
ENSG00000162613	6319.69205989803	0.0638491582344488	0.0448330221518922	1.42415467817741	0.154401701221884	0.227245035728263	far upstream element binding protein 1	FUBP1	31187	chr1
ENSG00000162616	899.968988315484	0.339092323731207	0.0718988877827308	4.71623879295463	2.40244452841195e-06	9.3669920992231e-06	DnaJ heat shock protein family (Hsp40) member B4	DNAJB4	38062	chr1
ENSG00000122420	14.0541828956236	-0.356034052855319	0.317710377786668	-1.12062456170187	0.262447705510258	0.353042409581324	prostaglandin F receptor	PTGFR	49659	chr1
ENSG00000137959	46429.4899218114	4.12629320811666	0.046110809606041	89.4864619244523	0	0	interferon induced protein 44 like	IFI44L	25743	chr1
ENSG00000137965	6531.23558028843	4.03180131446528	0.0601286408342017	67.0529261684551	0	0	interferon induced protein 44	IFI44	14287	chr1
ENSG00000162618	1397.55625802144	0.352532786408834	0.157425266504285	2.23936598131303	0.025132112941322	0.0473849275367818	adhesion G protein-coupled receptor L4	ADGRL4	117047	chr1
ENSG00000117114	186.437140387392	0.652907608637256	0.140883006324627	4.63439577043668	3.57981544228306e-06	1.35684209118198e-05	adhesion G protein-coupled receptor L2	ADGRL2	192026	chr1
ENSG00000137941	861.881825017887	-0.51076037665279	0.0739996251443101	-6.90220221598059	5.12024765773003e-12	3.42941503809226e-11	tubulin tyrosine ligase like 7	TTLL7	129453	chr1
ENSG00000142875	3689.98613936797	-0.392470922757424	0.0570777017455883	-6.87608139001075	6.15213598102714e-12	4.09898498640747e-11	protein kinase cAMP-activated catalytic subunit beta	PRKACB	74117	chr1
ENSG00000203943	95.1273748784855	-0.209602293060196	0.178009792626657	-1.17747619368221	0.239005494001709	0.327521716584534	sterile alpha motif domain containing 13	SAMD13	6121	chr1
ENSG00000117133	1164.67034957713	0.182694499437983	0.0658827736962943	2.77302379951649	0.00555380587898226	0.0122625021811677	ribosome production factor 1 homolog	RPF1	19114	chr1
ENSG00000174021	2016.25473205034	0.558577723177145	0.0539311174253066	10.3572436441867	3.87981587147511e-25	5.47198603021237e-24	G protein subunit gamma 5	GNG5	8257	chr1
ENSG00000117151	532.100315301396	0.244213064275761	0.0883379379883961	2.76453208934807	0.00570045000136525	0.0125546158624187	chitobiase	CTBS	21301	chr1
ENSG00000117155	890.526318294885	-0.174468836091594	0.0771623626959966	-2.26106135161988	0.0237554582048518	0.0450684356758262	SSX family member 2 interacting protein	SSX2IP	46851	chr1
ENSG00000162643	84.6019831542605	-0.176356852680281	0.176763787231652	-0.997697862453933	0.318425890047177	0.414842287452159	WD repeat domain 63	WDR63	70829	chr1
ENSG00000097096	18.4729918191542	0.342819511021616	0.300088636027064	1.14239417913412	0.253290209715533	0.343201372587658	synapse defective Rho GTPase homolog 2	SYDE2	43373	chr1
ENSG00000162642	1036.87332993779	0.3441026106665	0.0696819502191007	4.93818857802544	7.88515743760315e-07	3.24226746663629e-06	chromosome 1 open reading frame 52	C1orf52	2230	chr1
ENSG00000142867	926.805585420082	0.30791174267475	0.0713759178405584	4.31394442257922	1.60367277771045e-05	5.53870215828234e-05	B-cell CLL/lymphoma 10	BCL10	11128	chr1
ENSG00000153904	16113.1493014958	-0.19336610297904	0.111722477384634	-1.73077170776769	0.083492489877899	0.13480658528245	dimethylarginine dimethylaminohydrolase 1	DDAH1	146100	chr1
ENSG00000142871	500.880363939783	1.19750260040729	0.100122967437008	11.9603187067012	5.73414177625537e-33	1.0552779970625e-31	cysteine rich angiogenic inducer 61	CYR61	3205	chr1
ENSG00000117174	1130.56597101477	-0.221371810996169	0.074041531747986	-2.98983294605045	0.00279130058586202	0.00659227060792539	zinc finger HIT-type containing 6	ZNHIT6	59011	chr1
ENSG00000122417	542.528182004348	0.13888605446285	0.0964794807705481	1.43953982083667	0.149997636067471	0.221805183520741	outer dense fiber of sperm tails 2 like	ODF2L	49519	chr1
ENSG00000097033	5161.89504788271	0.201607039448868	0.0573470425946225	3.51556122735043	0.000438825561729047	0.00120831895246855	SH3 domain containing GRB2 like endophilin B1	SH3GLB1	43615	chr1
ENSG00000183291	3756.30439827753	0.139378401457589	0.0421180614332525	3.30923116389087	0.000935525611632209	0.00242900188930461	selenoprotein F	SELENOF	51980	chr1
ENSG00000153936	3752.23641109828	-0.520270295459814	0.0566342979213286	-9.18648795086199	4.05876573483658e-20	4.55838124429721e-19	heparan sulfate 2-O-sulfotransferase 1	HS2ST1	183791	chr1
ENSG00000143013	4501.78517120826	0.328385037456659	0.0407757438916953	8.05344074969876	8.04983764691817e-16	7.18533946750089e-15	LIM domain only 4	LMO4	17257	chr1
ENSG00000065243	3096.02657883443	0.177687413093615	0.0582841966950719	3.04863793565228	0.0022988135281933	0.00553842825775799	protein kinase N2	PKN2	152017	chr1
ENSG00000137947	1224.5332210298	0.670961442301707	0.0652495879706121	10.2829989149342	8.4070223331524e-25	1.17038119061431e-23	general transcription factor IIB	GTF2B	38981	chr1
ENSG00000137944	1107.23754574379	0.539916078077096	0.0671799973398511	8.03685768765011	9.21716141421497e-16	8.20116554041173e-15	kynurenine aminotransferase 3	KYAT3	57188	chr1
ENSG00000213516	2488.58604793236	0.767222420903361	0.0573268694339394	13.3832952763533	7.57146599167091e-41	1.70754237058536e-39	RNA binding motif protein, X-linked like 1	RBMXL1	13505	chr1
ENSG00000117226	498.890827127745	6.2733208849759	0.219424394053115	28.5898972721207	8.97227493209311e-180	7.66199453804658e-178	guanylate binding protein 3	GBP3	16190	chr1
ENSG00000117228	11266.4116435243	6.72255030177067	0.071028860591713	94.6453349493121	0	0	guanylate binding protein 1	GBP1	13057	chr1
ENSG00000162645	297.3627761632	4.52247645756415	0.188087988744575	24.0444724182028	9.53668751374138e-128	5.88375808942503e-126	guanylate binding protein 2	GBP2	18490	chr1
ENSG00000162654	66.2318734107416	4.64089251426511	0.306650240650754	15.134155787442	9.64099464513065e-52	2.73324149807803e-50	guanylate binding protein 4	GBP4	17803	chr1
ENSG00000154451	282.374229849725	6.39007262036549	0.271557148487491	23.5312259535669	1.95456245699283e-122	1.17483464421393e-120	guanylate binding protein 5	GBP5	10122	chr1
ENSG00000183347	15.9398743915149	0.445221201212373	0.30753565103143	1.44770598049093	0.147699296664168	0.218915086229407	guanylate binding protein family member 6	GBP6	24284	chr1
ENSG00000225492	410.041917869334	6.89500262268838	0.269232607903337	25.6098348427539	1.18547828843211e-144	8.47072623953659e-143	guanylate binding protein 1 pseudogene 1	GBP1P1	17256	chr1
ENSG00000197147	2384.24008115806	-0.319972174308338	0.0606982995132319	-5.27151793171051	1.35300065995283e-07	6.07917043395551e-07	leucine rich repeat containing 8 family member B	LRRC8B	39151	chr1
ENSG00000231999	46.4275564629567	0.362660324488714	0.226416392343863	1.60174058395001	0.109212986724749	0.169878750934231	uncharacterized LOC400761	FLJ27354	8046	chr1
ENSG00000171488	454.93344198426	-0.490022695696409	0.103230328068666	-4.74688693588631	2.06571346026343e-06	8.10708757599354e-06	leucine rich repeat containing 8 family member C	LRRC8C	86451	chr1
ENSG00000171492	2686.18432643818	-0.282570738084974	0.050656224741377	-5.57820365666066	2.43015042444984e-08	1.17928817374983e-07	leucine rich repeat containing 8 family member D	LRRC8D	115417	chr1
ENSG00000162664	644.310801620459	-0.564307172741183	0.100109434599756	-5.63690300516948	1.73135563858329e-08	8.52289480434412e-08	zinc finger protein 326	ZNF326	33417	chr1
ENSG00000122482	7110.98080030923	0.0365845277041965	0.0387699095532348	0.94363201064378	0.345357728451205	0.442843342515942	zinc finger protein 644	ZNF644	106956	chr1
ENSG00000162669	330.391869862658	0.0548582467786994	0.106929087727593	0.513033898862518	0.607927608321147	0.692084714236519	HFM1, ATP dependent DNA helicase homolog	HFM1	85290	chr1
ENSG00000097046	1869.79105804822	-0.232137949275927	0.0558801315548336	-4.15421264798092	3.26409519778134e-05	0.00010804455978475	cell division cycle 7	CDC7	24657	chr1
ENSG00000069702	146.723037283076	0.645463979327906	0.141768485306506	4.55294403359395	5.290034988433e-06	1.95569591544305e-05	transforming growth factor beta receptor 3	TGFBR3	205937	chr1
ENSG00000172031	21.0858386363669	-0.412842201064092	0.284859567542685	-1.44928325429066	0.147258495620546	0.218400426894604	epoxide hydrolase 4	EPHX4	33561	chr1
ENSG00000174842	646.180398638084	-0.0728206890987621	0.0784087177155775	-0.928732049450348	0.353027966997443	0.450656884313116	glomulin, FKBP associated protein	GLMN	52612	chr1
ENSG00000122484	1248.38244672323	0.0778392217544717	0.0649699121631841	1.19808106803291	0.230885458362742	0.318450939961611	RNA polymerase II associated protein 2	RPAP2	89211	chr1
ENSG00000067208	3597.17720932123	-0.466082070647993	0.0530270040074514	-8.78952298686343	1.501963156871e-18	1.55814770459099e-17	ecotropic viral integration site 5	EVI5	283709	chr1
ENSG00000122406	19262.2664621361	-0.574521410885233	0.0381790766736213	-15.0480698052654	3.5545478104961e-51	1.00163867376253e-49	ribosomal protein L5	RPL5	4782	chr1
ENSG00000154511	568.900725132056	-0.119908238558603	0.0865219885403313	-1.38587011904736	0.16578656649693	0.241104970279284	family with sequence similarity 69 member A	FAM69A	119363	chr1
ENSG00000143033	1348.15691349937	0.241356088784384	0.0611550449341911	3.94662597409759	7.92602276609767e-05	0.000247887335505131	metal response element binding transcription factor 2	MTF2	10287	chr1
ENSG00000117500	5041.21556510718	-0.174026219757937	0.051373138644081	-3.38749440565838	0.000705341556386867	0.00187160070049225	transmembrane p24 trafficking protein 5	TMED5	30948	chr1
ENSG00000122483	592.562342377325	-0.414897244823579	0.0808703010862804	-5.13040311771469	2.89122336996787e-07	1.25449733919989e-06	coiled-coil domain containing 18	CCDC18	10473	chr1
ENSG00000117505	2238.84217114025	-0.0209963114972797	0.0548555870012066	-0.38275611738177	0.701900601403508	0.770808274339852	down-regulator of transcription 1	DR1	16671	chr1
ENSG00000137942	5561.67095528622	-0.161084650017323	0.042736931124083	-3.76921425522173	0.000163762269610707	0.000487665444588124	formin binding protein 1 like	FNBP1L	106531	chr1
ENSG00000137936	1028.2829893842	0.546086075934816	0.0730279450870111	7.47776861698856	7.55951418476957e-14	5.9079796963001e-13	breast cancer anti-estrogen resistance 3	BCAR3	23377	chr1
ENSG00000067334	2471.04235123168	0.162011193059769	0.0539886924682855	3.00083565007503	0.00269239839187716	0.00638453089709442	deoxynucleotidyltransferase terminal interacting protein 2	DNTTIP2	2758	chr1
ENSG00000023909	2651.34148577519	0.19053234238811	0.0690530321180539	2.75921761208651	0.00579399382571625	0.0127386002400559	glutamate-cysteine ligase modifier subunit	GCLM	22423	chr1
ENSG00000137962	621.629041551133	0.847854847151613	0.0837427253918498	10.1245193917958	4.30086407602646e-24	5.82529994049812e-23	Rho GTPase activating protein 29	ARHGAP29	19321	chr1
ENSG00000117528	12789.3192405264	-0.393696555359561	0.0387346760907244	-10.1639304905363	2.87257229585577e-24	3.91727117852581e-23	ATP binding cassette subfamily D member 3	ABCD3	37171	chr1
ENSG00000117525	3073.15485296476	0.19005546642856	0.0616746843154275	3.08157988221787	0.00205905220054724	0.00501426292273763	coagulation factor III, tissue factor	F3	1601	chr1
ENSG00000143036	190.893514471288	0.412026619799288	0.129523753010234	3.18108926141705	0.00146722414763623	0.00367068134827535	solute carrier family 44 member 3	SLC44A3	74906	chr1
ENSG00000117519	46971.064138016	0.428061999958614	0.0474447926839602	9.02231785077079	1.84151019795932e-19	2.00547047608244e-18	calponin 3	CNN3	30229	chr1
ENSG00000235501	1202.15537445453	0.448889907439487	0.0672026177325271	6.67964913548623	2.39514989778829e-11	1.51508917427846e-10	hCG2028352-like	LOC729970	35243	chr1
ENSG00000172339	856.29767037878	0.356048330678263	0.0867670643067101	4.1034963384226	4.06952896504073e-05	0.000132783966080004	ALG14, UDP-N-acetylglucosaminyltransferase subunit	ALG14	90229	chr1
ENSG00000152078	208.13682341908	-0.953161552346383	0.132281485625522	-7.20555524334454	5.78078008668016e-13	4.1904671384035e-12	transmembrane protein 56	TMEM56	80268	chr1
ENSG00000271092	16.2081208542078	0.129205484273921	0.31070823827655	0.415841836027919	0.677525743162244	0.749980084807716	TMEM56-RWDD3 readthrough	TMEM56-RWDD3	127031	chr1
ENSG00000122481	64.0634282057442	0.122068862289145	0.197773585048139	0.617215197163121	0.537092793107387	0.629823709911158	RWD domain containing 3	RWDD3	13071	chr1
ENSG00000117569	1650.3421923349	0.148688669770559	0.063770800626011	2.33161052254238	0.0197211897630581	0.0381748808060303	polypyrimidine tract binding protein 2	PTBP2	92043	chr1
ENSG00000188641	106.319833732351	0.0748613507434218	0.170038727285052	0.440260592035159	0.65974837921134	0.735299701643706	dihydropyrimidine dehydrogenase	DPYD	843316	chr1
ENSG00000162627	1838.70592980546	0.309183160129612	0.0572401893467413	5.40150484577694	6.60841537138943e-08	3.070698648849e-07	sorting nexin 7	SNX7	98821	chr1
ENSG00000117598	325.152859930803	-1.08055934810576	0.108865110075108	-9.9256717543413	3.21927633533392e-23	4.20578032428653e-22	phospholipid phosphatase related 5	PLPPR5	114649	chr1
ENSG00000117600	188.018644519326	-0.887289355688717	0.149749713983074	-5.92514891740634	3.12014508627363e-09	1.65396033055497e-08	phospholipid phosphatase related 4	PLPPR4	45291	chr1
ENSG00000099260	44.1826398796109	-0.495118060418536	0.229814827041003	-2.15442174377286	0.0312071128993489	0.0572812078840605	palmdelphin	PALMD	48667	chr1
ENSG00000156869	70.3830029927494	1.4108818446698	0.200579056751848	7.03404367094672	2.00632283135757e-12	1.39239599867011e-11	ferric chelate reductase 1	FRRS1	57091	chr1
ENSG00000162688	2786.35220434326	-0.478926891808298	0.0498691789361378	-9.60366506979411	7.71511486388263e-22	9.51145982998911e-21	amylo-alpha-1, 6-glucosidase, 4-alpha-glucanotransferase	AGL	73535	chr1
ENSG00000117620	1190.91471654432	-0.340334824263031	0.0704851319124622	-4.82846261372829	1.37591158664385e-06	5.51348834647986e-06	solute carrier family 35 member A3	SLC35A3	57190	chr1
ENSG00000156875	101.194930534301	0.845525050215102	0.20334147380769	4.15815344691932	3.20830493456618e-05	0.000106323498837197	major facilitator superfamily domain containing 14A	MFSD14A	45141	chr1
ENSG00000156876	379.740727234726	-0.148147638944869	0.0990935671153618	-1.49502781318186	0.134907183553472	0.202853243039121	SAS-6 centriolar assembly protein	SASS6	49410	chr1
ENSG00000122435	617.032824765514	0.0391904258963649	0.0775498338317591	0.505357960938856	0.613307439920346	0.696510760305258	tRNA methyltransferase 13 homolog	TRMT13	17349	chr1
ENSG00000122477	25.5527643032682	0.349986355894549	0.272057916381276	1.28644062466486	0.198289328158221	0.280424319989486	leucine rich repeat containing 39	LRRC39	29826	chr1
ENSG00000137992	2149.69810702856	0.00110852158019842	0.0555618106005162	0.019951142128333	0.984082347730891	0.988883782734529	dihydrolipoamide branched chain transacylase E2	DBT	39311	chr1
ENSG00000137996	1404.37882718989	0.16503982503285	0.0576364142988617	2.86346447884613	0.00419035795001423	0.00952384990099794	RNA 3'-terminal phosphate cyclase	RTCA	7798	chr1
ENSG00000079335	558.19369435943	0.412349224528451	0.0871297102953513	4.73259033148021	2.216726003144e-06	8.68641512983541e-06	cell division cycle 14A	CDC14A	153180	chr1
ENSG00000181656	36.2831964013775	0.220453297985039	0.249598219783886	0.883232653565872	0.377110582344873	0.474394476398091	G protein-coupled receptor 88	GPR88	3856	chr1
ENSG00000162692	22337.3812288859	2.82488869153625	0.0415796017329567	67.9392917151776	0	0	vascular cell adhesion molecule 1	VCAM1	19406	chr1
ENSG00000162694	2479.54317445645	0.522281296040922	0.050844156472464	10.2721990544533	9.40362999324724e-25	1.3065261711848e-23	exostosin like glycosyltransferase 2	EXTL2	22808	chr1
ENSG00000162695	2152.97094086381	0.207805114542924	0.0590588725736474	3.51860957528079	0.000433814623092294	0.00119621456908989	solute carrier family 30 member 7	SLC30A7	85680	chr1
ENSG00000117543	1020.91110769076	-0.398539917341046	0.0663231396967928	-6.00906288759906	1.86598739666146e-09	1.01252047618147e-08	diphthamide biosynthesis 5	DPH5	36183	chr1
ENSG00000170989	2599.56957923999	-0.564773210466422	0.0558884926454861	-10.1053577173554	5.23043350186964e-24	7.05705406490215e-23	sphingosine-1-phosphate receptor 1	S1PR1	4618	chr1
ENSG00000060718	10513.1916358184	0.175705068568012	0.055416100041149	3.1706501980028	0.00152098178671466	0.00379153010139733	collagen type XI alpha 1 chain	COL11A1	154778	chr1
ENSG00000185946	256.911134936836	-0.0645488777852525	0.124220253945993	-0.519632473246402	0.603319760211391	0.687836035560237	RNA binding region (RNP1, RRM) containing 3	RNPC3	29282	chr1
ENSG00000240038	305.687882696897	-0.589836117141328	0.108812426850723	-5.42066870680598	5.93765073647032e-08	2.77281755799489e-07	amylase, alpha 2B (pancreatic)	AMY2B	35030	chr1
ENSG00000198890	1730.38024065581	0.330831626680184	0.0615233278638032	5.37733634000683	7.55958752592562e-08	3.49067007255484e-07	protein arginine methyltransferase 6	PRMT6	2650	chr1
ENSG00000162631	459.751621276116	-0.199044704097561	0.093420676602001	-2.13062794380679	0.0331198055743701	0.0603569130864089	netrin G1	NTNG1	86700	chr1
ENSG00000134215	967.018155664174	-0.538814745869729	0.0680950144473064	-7.91269008815142	2.51885845909802e-15	2.17891369485286e-14	vav guanine nucleotide exchange factor 3	VAV3	393764	chr1
ENSG00000085491	1124.33591638778	-0.227569150700234	0.0673194532583625	-3.38043670418498	0.000723707418235507	0.00191597776793729	solute carrier family 25 member 24	SLC25A24	58088	chr1
ENSG00000162636	1283.27797274632	-0.438500388111197	0.0590545936733008	-7.42533917915089	1.12491273209041e-13	8.63728224392882e-13	family with sequence similarity 102 member B	FAM102B	78979	chr1
ENSG00000162639	42.0881793590565	0.349744532818165	0.227612240317371	1.53658051223651	0.124396067799526	0.189734898355105	HEN1 methyltransferase homolog 1	HENMT1	13239	chr1
ENSG00000134186	1176.35594788941	-0.167305112777995	0.0929078047254418	-1.80076489023081	0.0717399449324885	0.118285604989346	pre-mRNA processing factor 38B	PRPF38B	9491	chr1
ENSG00000116266	3004.03617906945	0.179739677077252	0.0479791495401664	3.74620389898283	0.00017953068619151	0.00053089680323313	syntaxin binding protein 3	STXBP3	29769	chr1
ENSG00000121957	2751.03699446551	-0.400278765664748	0.0515310640368449	-7.7677178444937	7.99128257073321e-15	6.68951187467859e-14	G-protein signaling modulator 2	GPSM2	53442	chr1
ENSG00000121940	3318.33676514085	-0.395532047052177	0.0482236455568786	-8.20203538087259	2.3635070893205e-16	2.16912954036262e-15	chloride channel CLIC like 1	CLCC1	20941	chr1
ENSG00000085433	2845.60593254316	-0.200930824681421	0.0484668177381456	-4.14573999405121	3.3871801387284e-05	0.000111854416040772	WD repeat domain 47	WDR47	72013	chr1
ENSG00000197780	1202.32322681367	-0.0801325793878875	0.1976950824947	-0.405334206479494	0.685231865932453	0.756356052393238	TATA-box binding protein associated factor 13	TAF13	11627	chr1
ENSG00000215717	2259.03670702076	0.296826379014271	0.0501180762816756	5.92254134707876	3.17004066749924e-09	1.67786921951349e-08	transmembrane protein 167B	TMEM167B	6152	chr1
ENSG00000179902	20.3154121778399	-0.334875808236027	0.298871382148484	-1.12046796126387	0.26251439812785	0.353069638507686	chromosome 1 open reading frame 194	C1orf194	7907	chr1
ENSG00000116299	11.3665357421919	-0.83679994753297	0.332887614491119	-2.51376113470661	0.0119451308166007	0.0244043117558706	KIAA1324	KIAA1324	92819	chr1
ENSG00000031698	5011.28165607251	-0.0277356219791056	0.0495417827504098	-0.559843034289599	0.575586507392284	0.66325040759458	seryl-tRNA synthetase	SARS	3599	chr1
ENSG00000143126	2631.28696805297	-0.220939991102953	0.132719425397386	-1.66471479545227	0.0959696697582236	0.152008055300149	cadherin EGF LAG seven-pass G-type receptor 2	CELSR2	25738	chr1
ENSG00000134222	4455.63827787138	0.645134704486084	0.163644184022997	3.94230145322746	8.07034518480177e-05	0.000252007099917835	proline and serine rich coiled-coil 1	PSRC1	3615	chr1
ENSG00000134243	9031.07909333961	0.112365314738107	0.0475872613569266	2.36124776955149	0.0182135571965348	0.0355513405627136	sortilin 1	SORT1	47607	chr1
ENSG00000143106	4249.41376729966	0.618040713039757	0.0489744134980452	12.6196654313058	1.64518739795754e-36	3.35872441813343e-35	proteasome subunit alpha 5	PSMA5	27418	chr1
ENSG00000143028	18.7051835865209	-1.3061355637132	0.304415692691929	-4.29063151167776	1.78165737815047e-05	6.12923399189324e-05	synaptophysin like 2	SYPL2	1914	chr1
ENSG00000162650	286.431902387962	0.315848056745737	0.112528288579066	2.80683249282523	0.00500312503838972	0.0111930936362058	ataxin 7 like 2	ATXN7L2	8860	chr1
ENSG00000174151	444.376874235228	0.638852649172578	0.0931001092682359	6.86199677093766	6.79045991109741e-12	4.51998056344673e-11	cytochrome b561 family member D1	CYB561D1	6363	chr1
ENSG00000181754	886.146897444695	0.95387645336409	0.0750957379758751	12.7021383513207	5.75358238390351e-37	1.17977922820745e-35	adhesion molecule with Ig like domain 1	AMIGO1	2891	chr1
ENSG00000156097	107.81564599242	-0.474888690187346	0.1765371988625	-2.69002053531632	0.00714476223127686	0.0153469931056798	G protein-coupled receptor 61	GPR61	5962	chr1
ENSG00000065135	8599.21859942782	0.00115627026657095	0.041051940777441	0.0281660317313512	0.97752972922096	0.984019571296652	G protein subunit alpha i3	GNAI3	47269	chr1
ENSG00000116337	2042.25463206731	0.117531392618761	0.0616140067458102	1.90754341141357	0.0564502550835346	0.0959099626889364	adenosine monophosphate deaminase 2	AMPD2	11475	chr1
ENSG00000168765	734.688794356122	-0.171181642113714	0.0766903491203341	-2.23211452389029	0.0256073947554293	0.0481449273123624	glutathione S-transferase mu 4	GSTM4	5634	chr1
ENSG00000213366	255.838523296287	-0.212988269715225	0.122508216859083	-1.73856313621981	0.0821116355169741	0.132852755939836	glutathione S-transferase mu 2	GSTM2	15976	chr1
ENSG00000134202	1670.4078608501	-0.37262308986852	0.0586312426237776	-6.35536743199444	2.07929003086337e-10	1.22200826194887e-09	glutathione S-transferase mu 3	GSTM3	7107	chr1
ENSG00000184371	2413.94603955269	1.68381943332306	0.0698814525393475	24.0953696887592	2.79531722588346e-128	1.73223087382734e-126	colony stimulating factor 1	CSF1	20384	chr1
ENSG00000168710	4566.05614613086	-0.30975705209411	0.0486784167156884	-6.36333457399158	1.97420003008638e-10	1.16268593025062e-09	adenosylhomocysteinase like 1	AHCYL1	38978	chr1
ENSG00000143093	2682.65437882262	0.189521611237632	0.0569753110699105	3.32638133392696	0.00087981472904013	0.00229627381293459	striatin interacting protein 1	STRIP1	20202	chr1
ENSG00000116396	339.125765273707	-0.405706932643213	0.114507532321572	-3.54305890990528	0.000395514340180099	0.00110100940851168	potassium voltage-gated channel subfamily C member 4	KCNC4	23339	chr1
ENSG00000162775	1538.95022326513	0.0612601253893507	0.0567600541091551	1.07928236417008	0.280461872278974	0.373229620036777	RNA binding motif protein 15	RBM15	7359	chr1
ENSG00000168679	1541.81693450128	0.890816911492038	0.0585146880639084	15.2238171468864	2.45763366262743e-52	7.05310644366744e-51	solute carrier family 16 member 4	SLC16A4	28232	chr1
ENSG00000134248	1823.5460527545	0.0122742422382336	0.0593077953481873	0.206958329274817	0.836042402312886	0.878245672496832	late endosomal/lysosomal adaptor, MAPK and MTOR activator 5	LAMTOR5	6670	chr1
ENSG00000177301	1431.39696209878	-0.957871846375823	0.176455534949381	-5.4284035162207	5.6860370096817e-08	2.65797557812391e-07	potassium voltage-gated channel subfamily A member 2	KCNA2	37895	chr1
ENSG00000177272	172.464043771022	0.602318646907363	0.136172312031389	4.42320937290484	9.72454171793628e-06	3.46721503970717e-05	potassium voltage-gated channel subfamily A member 3	KCNA3	3346	chr1
ENSG00000121931	809.045418838589	0.460633648371346	0.0804981115313713	5.72229136321826	1.0509686784017e-08	5.28883088070997e-08	ligand dependent nuclear receptor interacting factor 1	LRIF1	16755	chr1
ENSG00000156171	882.050395331449	-0.187791440308972	0.067129373221455	-2.79745558906771	0.00515068476717097	0.0114773810921606	DNA damage regulated autophagy modulator 2	DRAM2	22885	chr1
ENSG00000134255	1398.98145755416	-0.0617566986990167	0.0590742591873678	-1.04540792467902	0.295834475643835	0.390275229030889	choline/ethanolamine phosphotransferase 1	CEPT1	44892	chr1
ENSG00000064886	17.8133337389766	1.41734240656307	0.309613466831159	4.57778022729221	4.69936028895988e-06	1.75225082126952e-05	chitinase 3 like 2	CHI3L2	15782	chr1
ENSG00000173947	378.031852953087	-0.063854539802354	0.100345212640087	-0.636348642076074	0.524549207284488	0.618480522648531	primary cilia formation	PIFO	6445	chr1
ENSG00000085465	11.4007483123309	0.498347645859077	0.329177716765031	1.51391670966234	0.130046965526937	0.196962014945902	oviductal glycoprotein 1	OVGP1	12754	chr1
ENSG00000116455	1019.13312125127	-0.0727955825864407	0.0756254115694061	-0.962580977422274	0.33575784758146	0.432672861186819	WD repeat domain 77	WDR77	9319	chr1
ENSG00000116459	6750.06711506206	-0.106687039790639	0.0455241718259337	-2.34352511010125	0.0191024763522419	0.0370745816675648	ATP synthase, H+ transporting, mitochondrial Fo complex subunit B1	ATP5F1	10797	chr1
ENSG00000143110	15.0629062710675	0.196997624733435	0.309899562229811	0.635682165266657	0.524983603120914	0.618836407853582	chromosome 1 open reading frame 162	C1orf162	4531	chr1
ENSG00000116473	976.906602904454	-0.15179111164547	0.0676977904779115	-2.24218708725799	0.0249492833528252	0.0470909317191801	RAP1A, member of RAS oncogene family	RAP1A	171047	chr1
ENSG00000197852	3819.19351756349	-0.698372705591736	0.0494816142048155	-14.1137817917786	3.12367200484314e-45	7.79804392652908e-44	family with sequence similarity 212 member B	FAM212B	17361	chr1
ENSG00000227811	247.187117086639	-1.47551129607878	0.12303884437074	-11.9922395534924	3.9021032915353e-33	7.22869796269204e-32	FAM212B antisense RNA 1	FAM212B-AS1	7958	chr1
ENSG00000064703	1888.34582041553	-0.123551605908461	0.0568100472745456	-2.17481962849588	0.0296436355857719	0.0547342276043158	DEAD-box helicase 20	DDX20	7181	chr1
ENSG00000171385	5783.23673811139	0.26963502089005	0.0428986440668549	6.28539728364935	3.27016323363132e-10	1.89407097134022e-09	potassium voltage-gated channel subfamily D member 3	KCND3	213324	chr1
ENSG00000143079	1480.31956580759	0.110897627016569	0.0619420531325472	1.79034470780721	0.0733985131891306	0.120580196740619	CTTNBP2 N-terminal like	CTTNBP2NL	64987	chr1
ENSG00000134245	20.7175002822095	-0.0969938915919576	0.290058374647354	-0.334394384267927	0.738081976467179	0.800374609401692	Wnt family member 2B	WNT2B	53871	chr1
ENSG00000007341	858.469441730213	0.175079027160546	0.0767614409999344	2.28081996481405	0.0225591024806443	0.0430788424108841	suppression of tumorigenicity 7 like	ST7L	87485	chr1
ENSG00000116489	5941.34006735385	0.222889963857168	0.0415266069888261	5.36740128845931	7.98792000080921e-08	3.6787510559465e-07	capping actin protein of muscle Z-line alpha subunit 1	CAPZA1	52167	chr1
ENSG00000155363	1760.7621900923	2.06789009897095	0.0602153079777929	34.3416013040002	1.87980670527439e-258	2.32979583251043e-256	Mov10 RISC complex RNA helicase	MOV10	26321	chr1
ENSG00000155366	2729.98534901492	-0.0532222007860859	0.0638684285025404	-0.833310009873954	0.404669912375432	0.502830460723797	ras homolog family member C	RHOC	6277	chr1
ENSG00000155367	25.6048256051524	1.42391112562855	0.280113642808078	5.08333371896547	3.70867257261728e-07	1.58740707150077e-06	protein phosphatase, Mg2+/Mn2+ dependent 1J	PPM1J	5335	chr1
ENSG00000155380	12921.0170208149	0.533159599943146	0.0393966072887395	13.5331348721375	9.96804197834813e-42	2.29987525381821e-40	solute carrier family 16 member 1	SLC16A1	44506	chr1
ENSG00000198799	2151.77010393284	-0.127737535510753	0.0749255985036982	-1.70485839368301	0.0882208377214951	0.14152724310304	leucine rich repeats and immunoglobulin like domains 2	LRIG2	51512	chr1
ENSG00000081026	1715.43142884323	-0.268444466396021	0.0578193027921032	-4.64281742312334	3.4369003998325e-06	1.30585431632268e-05	membrane associated guanylate kinase, WW and PDZ domain containing 3	MAGI3	291450	chr1
ENSG00000116793	1971.66276105634	0.572828310564274	0.0535414746943983	10.6987772345427	1.03130101825882e-26	1.5530506194317e-25	putative homeodomain transcription factor 1	PHTF1	61954	chr1
ENSG00000081019	1118.97073091949	-0.33743769501387	0.0776211972140521	-4.34723641382824	1.37863596100821e-05	4.81011376031887e-05	round spermatid basic protein 1	RSBN1	50617	chr1
ENSG00000134262	520.300352549389	0.214476671422031	0.0943722127467126	2.27266761242177	0.0230462178020182	0.0438953189605964	adaptor related protein complex 4 beta 1 subunit	AP4B1	10155	chr1
ENSG00000118655	725.707543608775	-0.46368828799561	0.0817213354020824	-5.67401750979946	1.39486865224488e-08	6.93473037795158e-08	DNA cross-link repair 1B	DCLRE1B	8780	chr1
ENSG00000163349	3005.62305956482	-0.392584404447078	0.0598910824412846	-6.55497260100375	5.56520937400434e-11	3.40501342433075e-10	homeodomain interacting protein kinase 1	HIPK1	26725	chr1
ENSG00000116774	35.1975796601343	2.07978746191992	0.267611501610986	7.7716669477951	7.74598986974675e-15	6.49985548986239e-14	olfactomedin like 3	OLFML3	2846	chr1
ENSG00000134207	22.1164152608681	0.405654400000768	0.28569793863527	1.41987163764117	0.155645054369174	0.228755271953014	synaptotagmin 6	SYT6	64559	chr1
ENSG00000197323	4051.78654839906	0.12223528852341	0.0572018139854381	2.13691280060676	0.0326050846648257	0.059542862267686	tripartite motif containing 33	TRIM33	118383	chr1
ENSG00000116752	1528.96262883588	0.171039605178556	0.0560439447910499	3.05188376400425	0.0022741014397775	0.00548644111353727	breast carcinoma amplified sequence 2	BCAS2	14085	chr1
ENSG00000175984	38.791688972626	-0.664800084133391	0.239193553234937	-2.77933947275084	0.00544695681794698	0.0120591123727344	DENN domain containing 2C	DENND2C	85537	chr1
ENSG00000213281	8072.27183917817	-0.230034437709657	0.0392997624924889	-5.85332895468827	4.81829764576525e-09	2.50576526286455e-08	neuroblastoma RAS viral oncogene homolog	NRAS	12431	chr1
ENSG00000009307	22989.7939012812	-0.0492411285931457	0.0379479352950233	-1.29759704211374	0.194425839109687	0.275600594810846	cold shock domain containing E1	CSDE1	41138	chr1
ENSG00000052723	3994.74976834109	-0.179047158369669	0.0446878051076849	-4.00662234222997	6.15932280481652e-05	0.000195559546319327	suppressor of IKBKE 1	SIKE1	11204	chr1
ENSG00000173218	751.892124523319	0.843389032546602	0.0797365008156889	10.5772014562828	3.80143238898911e-26	5.61001692389805e-25	VANGL planar cell polarity protein 1	VANGL1	55596	chr1
ENSG00000163393	38.2654296693272	-0.285361732975051	0.241970103135587	-1.17932640965628	0.238268225942401	0.32679918757451	solute carrier family 22 member 15	SLC22A15	55393	chr1
ENSG00000163399	5403.09684798087	0.0178787032584133	0.0603347846822377	0.296324969958444	0.766981918523069	0.822731446761304	ATPase Na+/K+ transporting subunit alpha 1	ATP1A1	30908	chr1
ENSG00000203865	79.122895767621	-0.0311611970326399	0.180566811797799	-0.17257433258297	0.862986028786731	0.899258667644432	ATP1A1 antisense RNA 1	ATP1A1-AS1	25758	chr1
ENSG00000116815	843.306824102815	0.0178912379126323	0.0778834633616306	0.229718057472088	0.818310862279753	0.863440339503348	CD58 molecule	CD58	56560	chr1
ENSG00000143061	2694.88897092427	-0.110411778128897	0.0466237454476803	-2.36814475260889	0.0178775398108822	0.0349734523049875	immunoglobulin superfamily member 3	IGSF3	93358	chr1
ENSG00000134247	10302.5309509529	-0.0141154941508454	0.0398202177865974	-0.354480586381835	0.722978750550635	0.788094927395971	prostaglandin F2 receptor inhibitor	PTGFRN	80284	chr1
ENSG00000134256	82.3129294030554	0.324128718251294	0.189838855362938	1.70738870939576	0.0877498275298287	0.140803888010455	CD101 molecule	CD101	34802	chr1
ENSG00000116830	747.082227277916	-0.0451295561319314	0.0803604849680912	-0.561588897203034	0.574396146772734	0.662206841783406	transcription termination factor 2	TTF2	42543	chr1
ENSG00000134253	231.030101227959	-0.378567758436157	0.138541113445788	-2.73253007010293	0.00628499340745655	0.0136891652677183	tripartite motif containing 45	TRIM45	10735	chr1
ENSG00000198162	5703.69631294598	-0.32629273099932	0.0565564734310868	-5.76932597109158	7.95892213763348e-09	4.05326198318389e-08	mannosidase alpha class 1A member 2	MAN1A2	158236	chr1
ENSG00000183508	27.4923048354029	0.870155030028033	0.270015872478666	3.22260696025114	0.0012702972836077	0.00321592795678342	family with sequence similarity 46 member C	FAM46C	22408	chr1
ENSG00000196505	1616.76923173735	-0.316947368017319	0.0583246990415185	-5.43418780080973	5.50465823142879e-08	2.57835245923613e-07	ganglioside induced differentiation associated protein 2	GDAP2	52459	chr1
ENSG00000065183	3017.88429096746	0.0373458914165578	0.0496526347594698	0.752143196377614	0.451964949286402	0.548982577168782	WD repeat domain 3	WDR3	12099	chr1
ENSG00000155761	15.4658140846574	0.412765586981042	0.313462878261918	1.31679256334828	0.187908166274653	0.267798297412895	sperm associated antigen 17	SPAG17	39517	chr1
ENSG00000092607	29.2013533720885	2.87951550280894	0.305176253425049	9.43558180065326	3.88830316460789e-21	4.63058552893993e-20	T-box 15	TBX15	106514	chr1
ENSG00000116874	731.446282356475	-0.200215242551619	0.0743385541923228	-2.69328943408877	0.00707508200430631	0.0152066487830432	tryptophanyl tRNA synthetase 2, mitochondrial	WARS2	109457	chr1
ENSG00000143067	463.844593298291	0.674281437874707	0.0896775398919981	7.51895556776834	5.52155445587476e-14	4.35764272751241e-13	zinc finger protein 697	ZNF697	28391	chr1
ENSG00000092621	2087.1513424824	-0.412900275690217	0.062619613941902	-6.59378507304921	4.28752282839782e-11	2.65458696780334e-10	phosphoglycerate dehydrogenase	PHGDH	32431	chr1
ENSG00000134250	18393.1910737973	-0.137307673490009	0.0455110280488123	-3.01701981644409	0.00255273123434536	0.00608631272335831	notch 2	NOTCH2	101586	chr1
ENSG00000265808	1943.68658726614	0.136396697951504	0.0548561172449416	2.48644462644832	0.0129026647600979	0.0261621282706198	SEC22 homolog B, vesicle trafficking protein (gene/pseudogene)	SEC22B	20591	chr1
ENSG00000270231	356.683909401578	-0.00792437544760598	0.0995800887511333	-0.0795779110762823	0.936572963897602	0.954775393753525	neuroblastoma breakpoint family member 8	NBPF8	653969	chr1
ENSG00000188610	81.551357682747	-0.420659769752467	0.196280773014818	-2.14315321511755	0.0321007975865429	0.05872148252345	family with sequence similarity 72 member B	FAM72B	16677	chr1
ENSG00000171943	4762.51509128489	-0.0752199544726634	0.0411541489894227	-1.82776114486042	0.067585406975768	0.112326547747295	SLIT-ROBO Rho GTPase activating protein 2C	SRGAP2C	65102	chr1
ENSG00000266338	1032.85786068054	-0.176628411156794	0.0753936299222069	-2.34274979648869	0.019142215222412	0.0371465600928196	neuroblastoma breakpoint family member 15	NBPF15	35421	chr1
ENSG00000215784	31.7976286949416	-0.71645250444582	0.256532296590205	-2.79283549856613	0.00522482549198677	0.0116259423284516	family with sequence similarity 72 member D	FAM72D	16692	chr1
ENSG00000272419	37.8759034740477	0.964086314269824	0.262558180172254	3.67189593421665	0.000240757723483068	0.000697953201693307	uncharacterized LOC388692	LOC388692	12267	chr1
ENSG00000162825	147.977919781258	-0.304891454500835	0.144245960999042	-2.11369145027818	0.0345416292194473	0.0625815675573557	neuroblastoma breakpoint family member 20	NBPF20	12795	chr1
ENSG00000117262	183.865448200843	0.0867280639348303	0.138118982207575	0.627922842672626	0.530054486170217	0.623580444648149	G protein-coupled receptor 89A	GPR89A	24201	chr1
ENSG00000265491	1597.47570108772	-0.12605741412722	0.0585467949817933	-2.15310529238058	0.0313104044233545	0.0574331648918244	ring finger protein 115	RNF115	77741	chr1
ENSG00000186141	855.591380038083	0.141815044909378	0.0783377852379979	1.81030194405586	0.0702489757504327	0.116114352104899	RNA polymerase III subunit C	POLR3C	18280	chr1
ENSG00000186364	254.221317901446	-0.209091067683525	0.114656476502649	-1.82363067540012	0.0682079258065017	0.113168442846361	nudix hydrolase 17	NUDT17	2943	chr1
ENSG00000131788	597.116253587364	0.11817832674565	0.0840484532070379	1.40607378525503	0.159702215767629	0.233761447724252	protein inhibitor of activated STAT 3	PIAS3	6143	chr1
ENSG00000198483	11.0191370209152	-0.238046176743463	0.332716002696948	-0.715463562960286	0.474322648099851	0.570940153557233	ankyrin repeat domain 35	ANKRD35	19318	chr1
ENSG00000143127	27.3133679890017	-0.382630563291606	0.274821370556447	-1.39228824351204	0.163835130144541	0.238887141871348	integrin subunit alpha 10	ITGA10	18879	chr1
ENSG00000131779	598.521409335748	0.0909771135807346	0.0849930906617984	1.07040599267942	0.284436603032242	0.377801083598876	peroxisomal biogenesis factor 11 beta	PEX11B	7173	chr1
ENSG00000265241	3666.87973753339	0.0935451723032225	0.0438041631403498	2.135531547618	0.0327176161072844	0.0597250017704013	RNA binding motif protein 8A	RBM8A	5979	chr1
ENSG00000271601	3678.61658021083	0.0479839496434341	0.129421151989786	0.370758171332155	0.710817658769826	0.77846428769717	limb and CNS expressed 1 like	LIX1L	22007	chr1
ENSG00000272031	31.0286072996792	-0.149292312045947	0.258714226653341	-0.577054899443115	0.563902369819757	0.65294587054948	ankyrin repeat domain 34A	ANKRD34A	5140	chr1
ENSG00000121851	571.18213255414	0.261543632870621	0.106016595736941	2.46700651961688	0.013624787684147	0.0274712282632419	RNA polymerase III subunit G like	POLR3GL	14152	chr1
ENSG00000265972	2707.59357344354	1.30236805983462	0.0575749993305988	22.6203747282106	2.73150246992394e-113	1.51804333695574e-111	thioredoxin interacting protein	TXNIP	4167	chr1
ENSG00000271425	241.7887099144	0.00769284964194853	0.117878978683795	0.0652605725621719	0.947966533930815	0.962955777739977	neuroblastoma breakpoint family member 10	NBPF10	45079	chr1
ENSG00000264343	54.3736576191696	-0.712733444979042	0.217582166777704	-3.2756978916715	0.00105401243057319	0.00271200516078955	notch 2 N-terminal like	NOTCH2NL	82544	chr1
ENSG00000268043	705.711638135433	0.277601257921333	0.0789255973487637	3.51725254222205	0.000436038709158223	0.00120116485479168	neuroblastoma breakpoint family member 12	NBPF12	126304	chr1
ENSG00000131791	1304.41550223375	-0.207020820759832	0.067943040230127	-3.04697611497279	0.00231156076904737	0.0055633972453185	protein kinase AMP-activated non-catalytic subunit beta 2	PRKAB2	11037	chr1
ENSG00000131781	62.0968901915634	-0.0394503370415578	0.201225940688318	-0.196049957110962	0.844571064505413	0.884484989037487	flavin containing monooxygenase 5	FMO5	39393	chr1
ENSG00000131778	2018.88670678272	-0.121802180750679	0.0590449540669719	-2.06287197060946	0.0391247938248165	0.0698461105820976	chromodomain helicase DNA binding protein 1 like	CHD1L	31409	chr1
ENSG00000116128	564.474944276142	-0.320630096788426	0.230921583988475	-1.3884804150851	0.164990804440338	0.240195137727547	B-cell CLL/lymphoma 9	BCL9	84834	chr1
ENSG00000162836	417.705185141463	-0.0430185739981344	0.100345698667466	-0.428703716944488	0.668138855331413	0.74228816983313	acid phosphatase 6, lysophosphatidic	ACP6	20689	chr1
ENSG00000188092	115.314660313729	0.048158630775339	0.155461323726751	0.309778854449907	0.756729132851967	0.814979352936927	G protein-coupled receptor 89B	GPR89B	64520	chr1
ENSG00000274020	156.293057050591	0.628420871826917	0.150559674029408	4.17389899306085	2.99430550083191e-05	9.98696083332959e-05	long intergenic non-protein coding RNA 1138	LINC01138	245641	chr1
ENSG00000270629	579.463727592617	0.10612320880208	0.0904861807396413	1.17281122857236	0.240871514293831	0.329466310937113	neuroblastoma breakpoint family member 14	NBPF14	71830	chr1
ENSG00000178104	4921.65725600206	-0.169913178914049	0.0450067486459599	-3.77528224157338	0.00015982659379558	0.000476350595043007	phosphodiesterase 4D interacting protein	PDE4DIP	104443	chr1
ENSG00000269713	651.092140867804	-0.246641696650581	0.0823646723690284	-2.99450831960482	0.00274887559116135	0.00650084475755061	neuroblastoma breakpoint family member 9	NBPF9	683597	chr1
ENSG00000277147	97.8591386270412	0.337431665061911	0.165534147618991	2.03844143287327	0.0415058062709607	0.073478915080166	long intergenic non-protein coding RNA 869	LINC00869	96472	chr1
ENSG00000203814	2547.08296835604	0.092448755364555	0.0600489882231991	1.53955558786316	0.123668718211302	0.188892618054823	histone cluster 2 H2B family member f	HIST2H2BF	18908	chr1
ENSG00000183598	818.727295392965	-0.0453746587860736	0.101143075600421	-0.448618538804695	0.653706857959059	0.730431309082094	histone cluster 2 H3 family member d	HIST2H3D	457	chr1
ENSG00000184678	5505.34121047734	0.221467747446635	0.0646968628267686	3.42316053314105	0.000618975105462356	0.00166163434004223	histone cluster 2 H2B family member e	HIST2H2BE	2223	chr1
ENSG00000184260	2649.57942688116	0.215614254152027	0.0673881184932209	3.19958857693463	0.00137623890546178	0.00345664022076619	histone cluster 2 H2A family member c	HIST2H2AC	437	chr1
ENSG00000184270	1318.10970152555	-0.428600771850788	0.0899876281450337	-4.76288552866411	1.90844113279597e-06	7.51834544720326e-06	histone cluster 2 H2A family member b	HIST2H2AB	448	chr1
ENSG00000178096	224.353891214645	-0.374388639160055	0.122554288203208	-3.05487996094661	0.00225150617323882	0.00544130180435024	bolA family member 1	BOLA1	1194	chr1
ENSG00000159164	4090.20294217235	-0.109696008529702	0.0720874547705294	-1.52170733283467	0.12808242943559	0.194386045106787	synaptic vesicle glycoprotein 2A	SV2A	12411	chr1
ENSG00000143368	591.663447921626	0.0731327547541096	0.108944595740354	0.671283915068222	0.502039679514953	0.597629217523429	splicing factor 3b subunit 4	SF3B4	2525	chr1
ENSG00000014914	1027.95883238928	1.16031326722984	0.0771216283916735	15.0452381702448	3.70995984396087e-51	1.04333308463197e-49	myotubularin related protein 11	MTMR11	4345	chr1
ENSG00000264522	1864.97433328794	0.466784052875069	0.0609885395296628	7.65363552685239	1.95375523735808e-14	1.59175928442117e-13	OTU deubiquitinase 7B	OTUD7B	10313	chr1
ENSG00000136631	3292.71938104889	0.111568005859971	0.0485400622806215	2.29847265574095	0.0215349024504375	0.0413428798928551	vacuolar protein sorting 45 homolog	VPS45	78106	chr1
ENSG00000023902	2346.43850421504	0.212008336476155	0.058831462947725	3.60365569464992	0.000313772647311457	0.000887396188529271	pleckstrin homology domain containing O1	PLEKHO1	9656	chr1
ENSG00000143401	4772.55105103256	-0.0843115862640804	0.13231739650179	-0.637191998128073	0.523999789226723	0.617988804052232	acidic nuclear phosphoprotein 32 family member E	ANP32E	8411	chr1
ENSG00000118298	1702.97783424348	-0.515637015807179	0.0569550201704267	-9.05340765860915	1.38574806713717e-19	1.5197652059715e-18	carbonic anhydrase 14	CA14	7263	chr1
ENSG00000117362	9107.10982211633	0.345224374027924	0.0494896122431117	6.97569365328731	3.04365307252681e-12	2.08339986709374e-11	aph-1 homolog A, gamma-secretase subunit	APH1A	3811	chr1
ENSG00000118292	744.746617612461	0.174453905911555	0.0782681851289987	2.22892488977515	0.0258189027385324	0.0484970135264413	chromosome 1 open reading frame 54	C1orf54	8563	chr1
ENSG00000159208	240.338090316718	0.109824919458673	0.128399992211244	0.855334315581491	0.392366095425765	0.490501398414517	circadian associated repressor of transcription	CIART	4273	chr1
ENSG00000266472	1969.72705942945	-0.00824692477172791	0.0592593751021591	-0.139166583473261	0.88931851402838	0.918963991848285	mitochondrial ribosomal protein S21	MRPS21	14551	chr1
ENSG00000117360	1451.27311063354	0.396642602320941	0.069694059845715	5.69119668446647	1.26152091077113e-08	6.29860975235285e-08	pre-mRNA processing factor 3	PRPF3	24685	chr1
ENSG00000163125	519.784953583435	-0.225243069647012	0.22053700205377	-1.02133912925911	0.307093793812999	0.402625780036609	regulation of nuclear pre-mRNA domain containing 2	RPRD2	112052	chr1
ENSG00000143374	1155.71185242575	0.0437541165876118	0.0670838503826096	0.652230251216384	0.514252647510531	0.609006285167004	threonyl-tRNA synthetase 2, mitochondrial (putative)	TARS2	20246	chr1
ENSG00000143369	28.1806143425821	-0.0823458286508525	0.261734060571979	-0.31461640288963	0.753052923480036	0.812596698513355	extracellular matrix protein 1	ECM1	3734	chr1
ENSG00000143382	41.4402260769835	0.191541329668674	0.247126009713161	0.77507555716614	0.438295013957866	0.536238461647585	ADAMTS like 4	ADAMTSL4	11115	chr1
ENSG00000143384	22678.2302314329	1.07013036066154	0.040667845943782	26.3139179326306	1.3290538177262e-152	9.79652564066074e-151	BCL2 family apoptosis regulator	MCL1	5060	chr1
ENSG00000143420	4795.32307222984	-0.0478413846642756	0.0416201257936903	-1.14947717605237	0.250359272838774	0.339920660795641	endosulfine alpha	ENSA	6345	chr1
ENSG00000143457	547.672814494177	0.184803648284869	0.090181859881588	2.04923305560035	0.0404393311999785	0.0719178201213586	golgi phosphoprotein 3 like	GOLPH3L	50972	chr1
ENSG00000163131	271.920974657308	4.16882504916909	0.172310819838755	24.1936348110362	2.59584525570097e-129	1.61576945804854e-127	cathepsin S	CTSS	35762	chr1
ENSG00000143387	52.1450705215165	0.392546514174451	0.223472964901503	1.75657272165995	0.078990665948805	0.128562163700977	cathepsin K	CTSK	2581	chr1
ENSG00000143437	1087.05330836089	-0.107072248994849	0.0669349353676743	-1.59964670775731	0.109676980493956	0.170366693857348	aryl hydrocarbon receptor nuclear translocator	ARNT	53575	chr1
ENSG00000143379	2476.74534773729	0.171035408702021	0.0480238443881279	3.56146849302018	0.00036878636874433	0.00103276406603966	SET domain bifurcated 1	SETDB1	38406	chr1
ENSG00000143418	3410.79564385065	-0.0180888887364059	0.0434269963226207	-0.416535571606724	0.677018143540975	0.749477440541566	ceramide synthase 2	CERS2	9831	chr1
ENSG00000143409	511.940164418633	-0.246566411097532	0.0979684152989995	-2.51679493176461	0.0118427735644197	0.024230539630343	family with sequence similarity 63 member A	FAM63A	11554	chr1
ENSG00000143363	447.384459239614	-0.104538398473915	0.0922484162103615	-1.13322702728606	0.257118927013817	0.347347407430163	prune exopolyphosphatase	PRUNE1	27217	chr1
ENSG00000163141	11.8589728136302	0.216606277717113	0.326528688790985	0.663360633085951	0.50709961229882	0.602420058549917	BCL2 interacting protein like	BNIPL	11048	chr1
ENSG00000143443	171.882383472091	-0.187991915535784	0.135675987875805	-1.38559459547011	0.165870729444525	0.241202322279159	chromosome 1 open reading frame 56	C1orf56	3613	chr1
ENSG00000197622	5748.70363876268	0.344539495297206	0.0410122769472335	8.40088678179198	4.43119477588471e-17	4.22744433489546e-16	CDC42 small effector 1	CDC42SE1	8679	chr1
ENSG00000213190	3240.82302740591	-0.337101625566143	0.0728969122374005	-4.62436082982935	3.75755268051039e-06	1.41959873996623e-05	myeloid/lymphoid or mixed-lineage leukemia; translocated to, 11	MLLT11	8823	chr1
ENSG00000143458	308.324974692584	0.0629792135665414	0.118930221486845	0.529547601771748	0.596425632111648	0.681817074338718	GA binding protein transcription factor beta subunit 2	GABPB2	25340	chr1
ENSG00000143434	448.072439990904	-0.510383445349055	0.0981111155665755	-5.20209603572108	1.97053346832322e-07	8.71677865567491e-07	semaphorin 6C	SEMA6C	14978	chr1
ENSG00000163156	750.159606224494	0.585248439579633	0.0720492864106334	8.12289015944034	4.55211267794277e-16	4.10246705627982e-15	TNFAIP8L2-SCNM1 readthrough	TNFAIP8L2-SCNM1	13669	chr1
ENSG00000163155	470.949544189295	0.0243139008301404	0.087842164651275	0.276790774984477	0.781940765035004	0.834776667547852	LysM domain containing 1	LYSMD1	6147	chr1
ENSG00000163159	2298.9646182092	0.253919631597714	0.0556039898384576	4.56657215310285	4.95764441933781e-06	1.84169257540653e-05	vacuolar protein sorting 72 homolog	VPS72	13914	chr1
ENSG00000143398	2910.30539443548	0.466117969022533	0.0560184574025013	8.32079265720231	8.7376984064596e-17	8.21285007936018e-16	phosphatidylinositol-4-phosphate 5-kinase type 1 alpha	PIP5K1A	48421	chr1
ENSG00000159352	4350.12002279165	0.164067848596281	0.0508553723061505	3.22616551912331	0.0012546077910453	0.00318023205675826	proteasome 26S subunit, non-ATPase 4	PSMD4	12758	chr1
ENSG00000143373	2297.79966674636	0.768145772899717	0.0566992926486337	13.5477135078197	8.17367009432508e-42	1.89523592170568e-40	zinc finger protein 687	ZNF687	9591	chr1
ENSG00000143393	3125.23854177527	0.377516822703305	0.0505392561864946	7.46977401705779	8.03326595293116e-14	6.26773758611704e-13	phosphatidylinositol 4-kinase beta	PI4KB	35919	chr1
ENSG00000143390	3964.72240778731	0.581460480865416	0.0470208725888621	12.3660078780237	3.99172808959261e-35	7.84069451539193e-34	regulatory factor X5	RFX5	6654	chr1
ENSG00000143416	1024.50208477629	0.239812734140539	0.067623959056247	3.54626877052661	0.000390727476001608	0.00108963327387545	selenium binding protein 1	SELENBP1	8433	chr1
ENSG00000159377	7171.61365692314	0.0923355917392532	0.0483731649494618	1.90881849132099	0.0562855106010138	0.0956764869483187	proteasome subunit beta 4	PSMB4	1563	chr1
ENSG00000143442	794.184278922726	-0.102209528380241	0.230632584678435	-0.443170372142989	0.657642507294065	0.733887116705449	pogo transposable element with ZNF domain	POGZ	56742	chr1
ENSG00000143375	269.205769592519	0.170502051702858	0.111745263344832	1.52581010236389	0.127057164041323	0.193081117881807	cingulin	CGN	27306	chr1
ENSG00000143367	254.159315300846	0.483317874411157	0.12900616658764	3.74647109665735	0.000179339656211377	0.000530443903957833	tuftelin 1	TUFT1	43279	chr1
ENSG00000143376	6112.90674619611	0.0851406855783043	0.063026488119275	1.35087148465545	0.176736604070047	0.254361950467681	sorting nexin family member 27	SNX27	55156	chr1
ENSG00000159409	29.9089482605829	-0.46468557579424	0.264751018397562	-1.75517955929615	0.0792285991172489	0.128887969640733	CUGBP, Elav-like family member 3	CELF3	16757	chr1
ENSG00000143436	1290.94258970691	0.107685861663087	0.0633224325438816	1.70059578157334	0.0890189168415077	0.14264415679237	mitochondrial ribosomal protein L9	MRPL9	1335	chr1
ENSG00000143450	51.3308406278934	-0.41539045929608	0.218476034882132	-1.90130903611549	0.0572615461929432	0.0970528808462022	ornithine decarboxylase antizyme 3	OAZ3	8362	chr1
ENSG00000182134	882.941360071224	0.00649286235538856	0.0711015345037644	0.0913181747862953	0.927239776934349	0.94795189984419	tudor and KH domain containing	TDRKH	17056	chr1
ENSG00000159445	146.147176661329	0.0447969912804505	0.150016205577881	0.298614347082616	0.765234317275773	0.82161197588525	thioesterase superfamily member 4	THEM4	39019	chr1
ENSG00000197747	232.072984685021	1.44034333892919	0.141286976116147	10.1944523021367	2.09924414605632e-24	2.879521475565e-23	S100 calcium binding protein A10	S100A10	11329	chr1
ENSG00000163191	49.9155842523268	1.45731088247906	0.229769070777265	6.34250239838307	2.26062689386002e-10	1.32524402044829e-09	S100 calcium binding protein A11	S100A11	4530	chr1
ENSG00000197956	287.234810997509	0.768348495531612	0.110510959341113	6.9526904852935	3.58384426624154e-12	2.42941621242559e-11	S100 calcium binding protein A6	S100A6	1642	chr1
ENSG00000188643	701.377151455759	-0.195553533200864	0.0750420558712098	-2.60591918665556	0.00916280774076386	0.0192362647892966	S100 calcium binding protein A16	S100A16	2115	chr1
ENSG00000189171	150.737648051258	-0.39677597325712	0.167200288242977	-2.373057949999	0.0176414958366849	0.0345744681210148	S100 calcium binding protein A13	S100A13	8264	chr1
ENSG00000160679	2337.1183947425	0.307312614562995	0.0482387449078892	6.37065941806324	1.88217188453428e-10	1.1108224712559e-09	chromatin target of PRMT1	CHTOP	4917	chr1
ENSG00000143553	1692.07172316646	0.269600881365033	0.0659563453308698	4.08756549521628	4.35923629657041e-05	0.00014122392859928	SNAP associated protein	SNAPIN	3199	chr1
ENSG00000143621	8291.6993688806	-0.00377892551203855	0.0451974093052687	-0.0836093389007152	0.933367041569226	0.952200278057766	interleukin enhancer binding factor 2	ILF2	9241	chr1
ENSG00000169418	528.509881701596	-0.859462722010039	0.111872443160655	-7.68252393286701	1.55984389849816e-14	1.28277238981014e-13	natriuretic peptide receptor 1	NPR1	9029	chr1
ENSG00000143624	3735.62505012568	0.0371477872548244	0.0441431537903607	0.841529978379936	0.40005109792027	0.498240607058548	integrator complex subunit 3	INTS3	7605	chr1
ENSG00000143554	346.392063336685	-0.318732289243186	0.102288714442172	-3.11600640384798	0.00183318291424833	0.00450495292403015	solute carrier family 27 member 3	SLC27A3	4866	chr1
ENSG00000143614	788.995943799746	-0.503674224531638	0.199701097467184	-2.52214049356642	0.0116643111237363	0.0239108134203639	GATA zinc finger domain containing 2B	GATAD2B	118249	chr1
ENSG00000198837	1146.41135104812	0.0671091280695945	0.0759253355815078	0.883883193345271	0.37675927067088	0.474037695242626	DENN domain containing 4B	DENND4B	17178	chr1
ENSG00000160741	133.762613494276	-0.0305399033023248	0.165237824211783	-0.184823925442048	0.853367141359594	0.891896030950829	CREB regulated transcription coactivator 2	CRTC2	10985	chr1
ENSG00000143570	3605.91464339651	0.217029285855163	0.0565782199143273	3.8359157673005	0.000125097280976681	0.00038020560331563	solute carrier family 39 member 1	SLC39A1	4543	chr1
ENSG00000143578	171.117444589131	-0.458139737533454	0.13655787675511	-3.35491257201544	0.000793900709786006	0.00208564611527912	cAMP responsive element binding protein 3 like 4	CREB3L4	6526	chr1
ENSG00000143543	1891.3062920375	0.270044997264538	0.0594360212791561	4.5434568373311	5.53391407599744e-06	2.04061260227341e-05	jumping translocation breakpoint	JTB	3707	chr1
ENSG00000143545	1042.78444797116	0.342811349767189	0.28755430996528	1.19216209907819	0.233197691407238	0.321102513829355	RAB13, member RAS oncogene family	RAB13	4761	chr1
ENSG00000177954	12370.9089789789	0.198328651288209	0.0456838490492248	4.34132971314452	1.41623016321201e-05	4.93513397257633e-05	ribosomal protein S27	RPS27	1393	chr1
ENSG00000143549	6760.73884450259	0.244369557363519	0.0406205935007632	6.01590317381572	1.7888647870326e-09	9.73486000360898e-09	tropomyosin 3	TPM3	27903	chr1
ENSG00000143612	6431.210456122	0.122190650989246	0.0491162557918399	2.48778431945429	0.0128541661276278	0.0260826711992795	chromosome 1 open reading frame 43	C1orf43	14091	chr1
ENSG00000143569	3836.27559071299	-0.0508013919277633	0.0728825522081894	-0.697030913278789	0.485783447934539	0.581884809127884	ubiquitin associated protein 2 like	UBAP2L	43326	chr1
ENSG00000143575	2071.8233400611	0.338295571833204	0.0606517499997836	5.57767206773772	2.43758624962542e-08	1.18207740394751e-07	HCLS1 associated protein X-1	HAX1	3317	chr1
ENSG00000143515	1296.97239617806	0.0799576585157358	0.0583796488114699	1.36961527079324	0.17080703013172	0.247455514326548	ATPase phospholipid transporting 8B2	ATP8B2	23505	chr1
ENSG00000160712	67.6328067328328	0.571501355272929	0.201519769830351	2.83595676867856	0.00456886300552597	0.0103121557441404	interleukin 6 receptor	IL6R	64258	chr1
ENSG00000160714	2457.52916611676	0.0948864172313283	0.0488628253989173	1.94189379055904	0.0521499592799821	0.0896828118230545	ubiquitin conjugating enzyme E2 Q1	UBE2Q1	10070	chr1
ENSG00000160716	265.132903548737	-0.689931595738469	0.113289750547613	-6.08997365078058	1.12929272783706e-09	6.25128247168304e-09	cholinergic receptor nicotinic beta 2 subunit	CHRNB2	12097	chr1
ENSG00000160710	25876.6453363717	1.78666425122743	0.0441360406811636	40.4808456683779	0	0	adenosine deaminase, RNA specific	ADAR	45923	chr1
ENSG00000143603	653.114619955169	-0.0716308894686722	0.0945502348444667	-0.757596103135055	0.448692813763618	0.54600250732118	potassium calcium-activated channel subfamily N member 3	KCNN3	170854	chr1
ENSG00000163344	783.1921633399	-0.554071298918049	0.07458821235511	-7.4284029798187	1.0991665791256e-13	8.44886275557303e-13	phosphomevalonate kinase	PMVK	12277	chr1
ENSG00000163346	4966.84907557476	0.0268869624628458	0.0542071331903854	0.496004139684234	0.619891490257548	0.702128626199888	PBX homeobox interacting protein 1	PBXIP1	4096	chr1
ENSG00000163348	1229.36962452289	-0.0154994734490912	0.0629077195796705	-0.246384284037854	0.80538477084922	0.853466534181547	pygopus family PHD finger 2	PYGO2	4757	chr1
ENSG00000160691	3620.29553899381	0.552486147975303	0.0445095759081855	12.4127479694476	2.22870035324077e-35	4.40860853773122e-34	SHC adaptor protein 1	SHC1	8450	chr1
ENSG00000173207	1012.68181386768	-0.164485114551856	0.0651194298972961	-2.52589917957322	0.0115402594192751	0.0236807814164026	CDC28 protein kinase regulatory subunit 1B	CKS1B	4608	chr1
ENSG00000160688	863.937705182426	0.221452317258555	0.0793972285706939	2.78916936075896	0.00528434232538826	0.011737861105006	flavin adenine dinucleotide synthetase 1	FLAD1	5055	chr1
ENSG00000160685	596.962713647898	0.349184022794565	0.0802214840523964	4.35274947751523	1.34440748301762e-05	4.69536827921741e-05	zinc finger and BTB domain containing 7B	ZBTB7B	4078	chr1
ENSG00000143537	2198.13903073378	0.214067356210336	0.0527711714075121	4.05652083326433	4.98091215109565e-05	0.000159774793119777	ADAM metallopeptidase domain 15	ADAM15	11505	chr1
ENSG00000243364	101.202897434737	-0.221097665168112	0.170568262823269	-1.29624152529007	0.194892287305562	0.276205877728637	ephrin A4	EFNA4	5817	chr1
ENSG00000143590	25.6323152691494	-0.895178846900654	0.278611097882167	-3.21300498689845	0.00131354008830794	0.00331641048075585	ephrin A3	EFNA3	23802	chr1
ENSG00000169242	139.776774120325	0.00218157031201647	0.145812762943058	0.0149614496562856	0.988062935655662	0.991461016970519	ephrin A1	EFNA1	7038	chr1
ENSG00000169241	408.097047618292	0.0838631552506531	0.0989968692378703	0.847129367789866	0.396923017501392	0.495298549574669	solute carrier family 50 member 1	SLC50A1	3047	chr1
ENSG00000179085	199.170882715813	-0.0553894546428479	0.1486225112145	-0.372685498248021	0.709382530864394	0.777365315448618	dolichyl-phosphate mannosyltransferase subunit 3	DPM3	517	chr1
ENSG00000163463	33.9264125897768	-0.236502766148112	0.25492609531269	-0.927730705081486	0.35354727680755	0.451114213893016	keratinocyte associated protein 2	KRTCAP2	3921	chr1
ENSG00000163462	116.185564278046	-0.0834925026840513	0.159957011510794	-0.521968383226621	0.601692344233955	0.686604846492018	tripartite motif containing 46	TRIM46	11185	chr1
ENSG00000169231	832.192477552034	0.32579630352407	0.0861637473821748	3.78112969111031	0.000156118313391005	0.000465793987865579	thrombospondin 3	THBS3	12394	chr1
ENSG00000173171	387.379638382424	0.259255644971678	0.107157420156899	2.41939050596849	0.015546540370714	0.0308923521412953	metaxin 1	MTX1	5135	chr1
ENSG00000160766	236.355993662074	-0.215586700294882	0.120723941921887	-1.78578247912394	0.0741344846744059	0.121660189272118	glucosylceramidase beta pseudogene 1	GBAP1	5194	chr1
ENSG00000177628	1668.88501552287	0.398928097823865	0.0543285999309836	7.34287462461105	2.09054344110733e-13	1.55922016722153e-12	glucosylceramidase beta	GBA	7522	chr1
ENSG00000160767	199.311898542167	0.0228638586500643	0.142873986394156	0.160028142470864	0.872858905409268	0.90678651214723	family with sequence similarity 189 member B	FAM189B	4701	chr1
ENSG00000116521	1918.62487046444	0.125873276437442	0.0657954966155489	1.91309866042861	0.0557354232250041	0.0949026872056149	secretory carrier membrane protein 3	SCAMP3	6407	chr1
ENSG00000176444	849.310788123977	-0.0109751451258679	0.0730618853075915	-0.150217108135964	0.880593328705534	0.912317618621172	CDC like kinase 2	CLK2	10623	chr1
ENSG00000143630	215.79780853331	-0.185693025393432	0.126178557540918	-1.47166863381851	0.141110381688596	0.210710192509734	hyperpolarization activated cyclic nucleotide gated potassium channel 3	HCN3	11281	chr1
ENSG00000160752	12522.8864463622	0.305140728145182	0.0457478905955981	6.67005022903817	2.55715890141658e-11	1.61029723086057e-10	farnesyl diphosphate synthase	FDPS	11919	chr1
ENSG00000160753	560.80369754232	0.364425146088945	0.0876302421100481	4.15866871201031	3.2010776082137e-05	0.000106134213785589	RUN and SH3 domain containing 1	RUSC1	7625	chr1
ENSG00000116539	4471.74860879142	-0.123522879014631	0.0679946777167714	-1.81665511423055	0.0692699386715742	0.114739857018971	ASH1 like histone lysine methyltransferase	ASH1L	84909	chr1
ENSG00000125459	359.513065171992	-0.0365346818872232	0.0989385721586933	-0.369266314341217	0.711929231274868	0.779498779141938	misato 1, mitochondrial distribution and morphology regulator	MSTO1	4798	chr1
ENSG00000163374	1072.91862680283	0.416482444342898	0.0716835631885068	5.81001314412443	6.24679377931534e-09	3.21286620930265e-08	YY1 associated protein 1	YY1AP1	29336	chr1
ENSG00000132676	2680.26419901509	0.132668333763967	0.0515064895025542	2.57575957991445	0.0100020165527496	0.020792376699014	death associated protein 3	DAP3	49919	chr1
ENSG00000116580	2356.29190568881	0.236160176144323	0.0526629482831919	4.48437058393285	7.31294733847313e-06	2.64725303389279e-05	gon-4 like	GON4L	109682	chr1
ENSG00000132718	27314.6600825227	0.195977311383146	0.0412512334162297	4.75082307008163	2.02590337530355e-06	7.95870316160623e-06	synaptotagmin 11	SYT11	25731	chr1
ENSG00000143622	2941.50906455969	0.206934456971188	0.0487749291622577	4.24263982593981	2.2090581796308e-05	7.49826946333722e-05	Ras like without CAAX 1	RIT1	13108	chr1
ENSG00000132680	1508.22216792216	0.158364040340157	0.0580674139256321	2.72724458752333	0.00638656795111321	0.0138780270217751	KIAA0907	KIAA0907	13013	chr1
ENSG00000116584	1896.39641263211	0.0299660210040149	0.058988867815061	0.507994510048284	0.611457193306793	0.695029461266264	Rho/Rac guanine nucleotide exchange factor 2	ARHGEF2	17630	chr1
ENSG00000163479	4493.17125096205	-0.132679653009881	0.0473226491650457	-2.8037241226107	0.00505161089029459	0.0112907453748126	signal sequence receptor subunit 2	SSR2	10734	chr1
ENSG00000160803	1761.95285421871	-0.311588886926652	0.081175427921231	-3.83846312740112	0.000123806801575929	0.000376528611524623	ubiquilin 4	UBQLN4	18425	chr1
ENSG00000116586	890.326066565609	-0.0523395256798825	0.0691877403321355	-0.756485548286833	0.449358133846302	0.546479738148443	late endosomal/lysosomal adaptor, MAPK and MTOR activator 2	LAMTOR2	4089	chr1
ENSG00000254726	2219.57196916252	-0.0963540076478313	0.132317581099534	-0.728202608052141	0.466489569593374	0.56340000191059	mex-3 RNA binding family member A	MEX3A	9986	chr1
ENSG00000160789	4464.14690216047	0.732589915398395	0.069865295854432	10.4857484168504	1.00447207794414e-25	1.45627654778547e-24	lamin A/C	LMNA	13930	chr1
ENSG00000196189	129.864286749499	-1.35627797081809	0.160473912489222	-8.45170376779576	2.87082244796811e-17	2.76519039778497e-16	semaphorin 4A	SEMA4A	23381	chr1
ENSG00000160785	967.893890391671	-0.0418554455494306	0.0796965083359108	-0.525185436895367	0.599454287690056	0.68466459787141	solute carrier family 25 member 44	SLC25A44	18858	chr1
ENSG00000160783	680.418918764454	-0.0795398815364048	0.0796381680200174	-0.998765836959134	0.317908139072911	0.414318478587925	polyamine modulated factor 1	PMF1	27090	chr1
ENSG00000160781	2176.11893835696	-0.538283639624588	0.0641151910444418	-8.39557101610246	4.63635470866789e-17	4.41415008123004e-16	progestin and adipoQ receptor family member 6	PAQR6	2667	chr1
ENSG00000198952	4962.84380595541	0.370154669172055	0.0503147302609944	7.3567853241382	1.88391953250677e-13	1.41092476217954e-12	SMG5, nonsense mediated mRNA decay factor	SMG5	33606	chr1
ENSG00000163472	141.422865219514	-0.170980483208854	0.142907824218579	-1.19643892238775	0.231525319982548	0.319176307348714	transmembrane protein 79	TMEM79	8165	chr1
ENSG00000198715	1965.67905600507	-0.0985142686971248	0.0591967961594427	-1.66418244041085	0.0960759760747465	0.152124821359732	glycosylated lysosomal membrane protein	GLMP	3003	chr1
ENSG00000163468	10600.0171220358	0.0962188330118099	0.0580066375919086	1.65875556671176	0.0971650572746408	0.153606121134591	chaperonin containing TCP1 subunit 3	CCT3	29455	chr1
ENSG00000125462	35260.1499497825	0.0785239739041257	0.0352010924684783	2.23072548030837	0.0256993187484808	0.0482983036865907	chromosome 1 open reading frame 61	C1orf61	25286	chr1
ENSG00000116604	153.612856250474	-0.108811084984875	0.148274094424261	-0.73385094953627	0.463039584493353	0.559782126286853	myocyte enhancer factor 2D	MEF2D	26879	chr1
ENSG00000183856	695.112426755662	-0.736711930778151	0.0862758358708759	-8.53902976820468	1.35353507066958e-17	1.33307022958702e-16	IQ motif containing GTPase activating protein 3	IQGAP3	20900	chr1
ENSG00000163382	2658.01617645851	-0.232083366179426	0.0557288717548928	-4.16450860875449	3.12023854306345e-05	0.000103773309892196	NAD(P)HX epimerase	NAXE	1001	chr1
ENSG00000160818	658.171124924046	0.113161471519586	0.111148070718384	1.0181145816404	0.308623506454716	0.404252918808295	G-patch domain containing 4	GPATCH4	7180	chr1
ENSG00000132692	30327.5440491645	-0.287471265111866	0.12557418887449	-2.2892544056103	0.0220645751650297	0.0422381595388521	brevican	BCAN	11525	chr1
ENSG00000132688	35808.969921838	-0.00628619337127819	0.0468313324051155	-0.134230504417413	0.893220305142802	0.92159301241448	nestin	NES	8634	chr1
ENSG00000143319	539.411100554634	-0.0820955922049211	0.107599082641652	-0.76297669263903	0.445477296046971	0.543175128951578	interferon stimulated exonuclease gene 20 like 2	ISG20L2	5799	chr1
ENSG00000143303	373.131981213177	0.036853444578499	0.100626546370727	0.366239783711984	0.714186158202487	0.781359045826563	ribosomal RNA adenine dimethylase domain containing 1	RRNAD1	8490	chr1
ENSG00000143314	1257.46030523013	-0.144260940445534	0.0703849265411197	-2.04959992905945	0.040403487361732	0.0718632004700351	mitochondrial ribosomal protein L24	MRPL24	3830	chr1
ENSG00000143321	6964.30470040251	0.0511641073202371	0.0453366266428191	1.12853803004201	0.259092765285456	0.349541872442232	hepatoma-derived growth factor	HDGF	9187	chr1
ENSG00000143294	646.275023965048	0.0385703116886217	0.114527896603808	0.336776565643653	0.736285340077475	0.798921220096462	papillary renal cell carcinoma (translocation-associated)	PRCC	33336	chr1
ENSG00000132694	2445.30183037066	0.491027624744326	0.061547642876377	7.97800860921013	1.48713024772653e-15	1.30333286103943e-14	Rho guanine nucleotide exchange factor 11	ARHGEF11	110531	chr1
ENSG00000117036	1009.57672084386	0.414236218615926	0.0658414205891485	6.29142285979471	3.14569128576947e-10	1.82348536660602e-09	ETS variant 3	ETV3	13925	chr1
ENSG00000183853	2112.13177181644	0.175845418938116	0.0609918877115811	2.8830952039008	0.00393788405784185	0.009002622629787	kin of IRRE like (Drosophila)	KIRREL	102782	chr1
ENSG00000163565	5856.16738944298	4.06037056076704	0.055977527812862	72.535724949148	0	0	interferon gamma inducible protein 16	IFI16	45264	chr1
ENSG00000163568	184.071929104154	2.5194927577078	0.151391932908852	16.6421863391143	3.44795723181577e-62	1.19231212423654e-60	absent in melanoma 2	AIM2	14373	chr1
ENSG00000162706	2939.01229125878	3.33801399504176	0.0640638510136733	52.1044854816693	0	0	cell adhesion molecule 3	CADM3	31556	chr1
ENSG00000158716	96.6122590469069	0.215129319672316	0.194083122596494	1.10843908936676	0.267672231116089	0.35886938510251	dual specificity phosphatase 23	DUSP23	1575	chr1
ENSG00000158710	776.101100988055	0.494457040768718	0.098053902620431	5.0427063844952	4.58993271033336e-07	1.94675977008536e-06	transgelin 2	TAGLN2	5878	chr1
ENSG00000085552	33.489115275838	0.714133154470492	0.248146909629936	2.87786438902457	0.00400377212766778	0.00913574919428789	immunoglobulin superfamily member 9	IGSF9	5431	chr1
ENSG00000177807	2009.28777989835	-0.23019057316951	0.14809070379479	-1.55438908230517	0.120091635875007	0.184114215701092	potassium voltage-gated channel subfamily J member 10	KCNJ10	32795	chr1
ENSG00000143315	619.513069655729	-0.233647220695927	0.0823955768426299	-2.83567673956792	0.00457287053076409	0.0103195378316711	phosphatidylinositol glycan anchor biosynthesis class M	PIGM	4322	chr1
ENSG00000162728	27.7770308005941	0.118870795312893	0.26582693212764	0.447173634219335	0.654749696554922	0.731358230997902	potassium voltage-gated channel subfamily J member 9	KCNJ9	1629	chr1
ENSG00000162729	2216.13824410774	1.02172981336037	0.0745377960661284	13.707539896322	9.15082050083217e-43	2.14309767749422e-41	immunoglobulin superfamily member 8	IGSF8	7311	chr1
ENSG00000018625	41384.2383002982	-0.282602146252979	0.0517460472575248	-5.46132818312772	4.72585489838147e-08	2.22697166392438e-07	ATPase Na+/K+ transporting subunit alpha 2	ATP1A2	16033	chr1
ENSG00000143318	89.3602509389487	-0.247678699083013	0.173962441531601	-1.42374812001027	0.154519398615802	0.227387220512169	calsequestrin 1	CASQ1	11392	chr1
ENSG00000162734	23387.9390620266	0.0784669720512902	0.0503723148778535	1.55774004513318	0.119294883571838	0.183012908798728	phosphoprotein enriched in astrocytes 15	PEA15	10038	chr1
ENSG00000132716	1187.77033625707	-0.0672582945002465	0.0642510706386213	-1.04680426071869	0.295189864893429	0.389534915465228	DDB1 and CUL4 associated factor 8	DCAF8	46814	chr1
ENSG00000162735	2534.43969300038	0.00063412978241924	0.0475463444053257	0.0133370880632457	0.989358858819876	0.992548052849023	peroxisomal biogenesis factor 19	PEX19	8343	chr1
ENSG00000122218	8776.91785865715	-0.00421253501560862	0.0432118931188819	-0.0974855464910865	0.922340811787121	0.944115119798175	coatomer protein complex subunit alpha	COPA	38132	chr1
ENSG00000162736	2052.62056170163	0.266335853403569	0.0740030588368207	3.59898438780549	0.000319462365163068	0.000902030327441283	nicastrin	NCSTN	15680	chr1
ENSG00000162738	1279.69455722171	0.0815211984529485	0.218879803491171	0.372447330236373	0.709559820035532	0.777422992602244	VANGL planar cell polarity protein 2	VANGL2	28238	chr1
ENSG00000158769	47.0677347295401	0.153725190189694	0.231704223418228	0.663454415814507	0.507039564878788	0.602399822372534	F11 receptor	F11R	43774	chr1
ENSG00000158773	3035.63868193096	0.978430660648163	0.0543748534246597	17.9941755981715	2.16418653955878e-72	8.23625882785888e-71	upstream transcription factor 1	USF1	6729	chr1
ENSG00000162755	131.780256500311	-0.194238239438463	0.148345942315148	-1.30935997579105	0.190412442411705	0.270898644451029	kelch domain containing 9	KLHDC9	1988	chr1
ENSG00000143256	755.016534995012	0.0935932076131351	0.0839865481127554	1.11438331156892	0.265114779616357	0.355885185544937	prefoldin subunit 2	PFDN2	17521	chr1
ENSG00000158793	959.367798762834	-0.220430540406354	0.0709453430026899	-3.10704735613155	0.00188966125062379	0.00463074467453827	nitrilase 1	NIT1	7374	chr1
ENSG00000158796	1528.98734995666	0.844660361932282	0.0578549800069718	14.5996137554709	2.82440964532279e-48	7.43531148171911e-47	death effector domain containing	DEDD	11488	chr1
ENSG00000143222	2221.18149502861	-0.0589284917654829	0.0510146193318145	-1.15512950086316	0.24803739905926	0.337487979580777	ubiquitin-fold modifier conjugating enzyme 1	UFC1	5113	chr1
ENSG00000143258	484.029246237011	-0.128738160168348	0.0961059393630839	-1.33954426772711	0.180393553342794	0.258800626364048	ubiquitin specific peptidase 21	USP21	892	chr1
ENSG00000143224	398.256849482973	-0.100661232719479	0.0963675732185812	-1.04455502361939	0.296228675905771	0.390721661900576	protoporphyrinogen oxidase	PPOX	11621	chr1
ENSG00000158850	1276.79041682607	-0.119287231685848	0.0586168565880254	-2.03503290059087	0.0418475626325362	0.0739900409883436	beta-1,4-galactosyltransferase 3	B4GALT3	4364	chr1
ENSG00000158859	2464.45292846508	-0.124447845367548	0.0577620199789953	-2.15449261318774	0.0312015606410949	0.05727852363069	ADAM metallopeptidase with thrombospondin type 1 motif 4	ADAMTS4	9308	chr1
ENSG00000158864	4792.47130010597	-0.0726378811147497	0.0403167172996154	-1.80168143589018	0.0715955404642202	0.118103126525489	NADH:ubiquinone oxidoreductase core subunit S2	NDUFS2	8903	chr1
ENSG00000248485	120.137219976066	-0.86649026648659	0.185176587831739	-4.67926467720599	2.87905587290165e-06	1.10931961131774e-05	Purkinje cell protein 4 like 1	PCP4L1	26724	chr1
ENSG00000158887	23.1639279795604	0.338240739635411	0.282424611560851	1.19763195482889	0.231060330230367	0.31862937424934	myelin protein zero	MPZ	5238	chr1
ENSG00000143252	2011.43936554499	-0.446935063632448	0.0526842807060759	-8.48327162566547	2.18948724884866e-17	2.1235297036098e-16	succinate dehydrogenase complex subunit C	SDHC	50370	chr1
ENSG00000188931	14.2214241837057	0.468395707809501	0.317621365012799	1.47469836542836	0.140293655741809	0.209736619199833	cilia and flagella associated protein 126	CFAP126	3153	chr1
ENSG00000143226	96.8499000415281	1.18719835530801	0.180800056473309	6.56636053364992	5.15598926005876e-11	3.16986960435131e-10	Fc fragment of IgG receptor IIa	FCGR2A	14156	chr1
ENSG00000173110	117.688180344579	-0.142511457374376	0.154343175799351	-0.923341486504353	0.35582927443222	0.453158951388856	heat shock protein family A (Hsp70) member 6	HSPA6	2652	chr1
ENSG00000162746	81.8283294000006	-0.236289413128534	0.181758833355185	-1.30001611897887	0.193595444655676	0.274650978614892	Fc receptor like B	FCRLB	5491	chr1
ENSG00000081721	899.029398808753	0.246387825686746	0.0696796812185972	3.53600678673866	0.000406224257372345	0.00112835595487895	dual specificity phosphatase 12	DUSP12	7372	chr1
ENSG00000118217	4561.54706354765	-0.0238215731730029	0.0469369787122275	-0.50752250840545	0.611788247389793	0.695292899837219	activating transcription factor 6	ATF6	197827	chr1
ENSG00000162745	45.6399949419965	1.45001190145037	0.250887811196323	5.7795231045151	7.49126665132169e-09	3.8276245695644e-08	olfactomedin like 2B	OLFML2B	2041	chr1
ENSG00000198929	185.758369318131	-0.163617852299767	0.163205985124869	-1.00252360337511	0.316090772595596	0.412298711949457	nitric oxide synthase 1 adaptor protein	NOS1AP	300233	chr1
ENSG00000239887	523.532147333852	-0.101378472885646	0.0966141970852293	-1.04931237793359	0.294034370948063	0.388302816136503	chromosome 1 open reading frame 226	C1orf226	7913	chr1
ENSG00000152332	4804.94317366519	0.286231664605105	0.0459610808008443	6.22769655581831	4.7334271001159e-10	2.70578149131115e-09	U2AF homology motif kinase 1	UHMK1	32456	chr1
ENSG00000117143	1377.74470722663	-0.187212734513264	0.0611310998577024	-3.06247940817435	0.00219511577853622	0.00532431528895042	UDP-N-acetylglucosamine pyrophosphorylase 1	UAP1	38338	chr1
ENSG00000162733	2854.69482319183	0.547144255482781	0.0576859466935102	9.48487953902879	2.42663192059641e-21	2.9196718254255e-20	discoidin domain receptor tyrosine kinase 2	DDR2	148020	chr1
ENSG00000132196	1255.64567319235	0.203347824750451	0.0606474757199323	3.35294787353563	0.000799557634417626	0.00209971960810404	hydroxysteroid 17-beta dehydrogenase 7	HSD17B7	22113	chr1
ENSG00000117152	438.957652223351	1.89809677124415	0.116192440045397	16.335802660677	5.49049233468668e-60	1.83518723501878e-58	regulator of G-protein signaling 4	RGS4	8197	chr1
ENSG00000143248	58.3917896721918	0.236492907427015	0.204576883234259	1.15600992491516	0.247677097391628	0.337095991153523	regulator of G-protein signaling 5	RGS5	17586	chr1
ENSG00000232995	28.4213032365896	0.052109198350054	0.267728249358699	0.19463466584073	0.845678962600722	0.885579024317565	regulator of G-protein signaling 5	RGS5	17586	chr1
ENSG00000143228	1006.14081141396	-0.286765564393042	0.0694762583864389	-4.1275332185853	3.66675475774111e-05	0.000120405393627583	NUF2, NDC80 kinetochore complex component	NUF2	33831	chr1
ENSG00000185630	3963.64527784498	-0.124210554890518	0.123415619512005	-1.00644112456476	0.314203419540429	0.410218969950938	PBX homeobox 1	PBX1	292464	chr1
ENSG00000143171	119.709662713957	0.25278973368281	0.159807826958665	1.58183574918514	0.113687071622292	0.175718732818695	retinoid X receptor gamma	RXRG	8428	chr1
ENSG00000143198	6678.9394917251	-0.325277702929323	0.0416108863854278	-7.81712987116842	5.40413411088327e-15	4.58696352866183e-14	microsomal glutathione S-transferase 3	MGST3	25263	chr1
ENSG00000143149	7273.9850178681	-0.373021215244524	0.039857475828759	-9.35887703594545	8.05886289230271e-21	9.46055111539811e-20	aldehyde dehydrogenase 9 family member A1	ALDH9A1	29816	chr1
ENSG00000143183	3613.1160419329	0.128745371879425	0.0422283543109536	3.04878970493126	0.00229765257412174	0.00553658367181262	transmembrane and coiled-coil domains 1	TMCO1	44632	chr1
ENSG00000143157	5244.7549894695	-0.0153980515687286	0.0420903217137721	-0.365833544191949	0.714489287718024	0.78144871219053	pogo transposable element with KRAB domain	POGK	11225	chr1
ENSG00000152382	1526.973962361	-0.175148702001184	0.0569541459491831	-3.07525815868539	0.00210320419455719	0.00511644515281803	transcriptional adaptor 1	TADA1	13702	chr1
ENSG00000143195	8257.39528470081	0.163125561469275	0.0472093470735867	3.45536576083134	0.000549546767472142	0.00149068419106089	immunoglobulin like domain containing receptor 2	ILDR2	62121	chr1
ENSG00000143194	79.7426595842515	0.127297673603862	0.18036166587425	0.705791183435925	0.480318005709481	0.5766698388308	maelstrom spermatogenic transposon silencer	MAEL	32929	chr1
ENSG00000143190	1434.26219887349	-0.28228571936127	0.0864340427415228	-3.26590901463944	0.00109113301961392	0.00279570397725813	POU class 2 homeobox 1	POU2F1	206517	chr1
ENSG00000143162	449.702894333184	-0.0105602765647968	0.0957291434492508	-0.110314123623128	0.912160256594746	0.935883105758931	cellular repressor of E1A stimulated genes 1	CREG1	12806	chr1
ENSG00000197965	7037.42900175886	-0.107052657279105	0.0433612368009307	-2.46885617609523	0.0135545684673144	0.0273453948984065	myelin protein zero like 1	MPZL1	69970	chr1
ENSG00000143158	1301.44987061106	-0.195805128734123	0.0608429950323875	-3.21820332200762	0.00128996341493809	0.0032621772528364	mitochondrial pyruvate carrier 2	MPC2	20395	chr1
ENSG00000143164	1771.94283717318	0.134426271752505	0.0532026207814516	2.52668514779955	0.0115144678128965	0.0236313191265556	DDB1 and CUL4 associated factor 6	DCAF6	139287	chr1
ENSG00000143147	3528.25966716961	-0.127926881376334	0.0487751551239718	-2.62278779126755	0.00872135754800979	0.0183783647998611	G protein-coupled receptor 161	GPR161	57166	chr1
ENSG00000143155	2853.34298341358	-0.0522215326506744	0.0482378696433222	-1.08258372595656	0.278993233977733	0.371592985435868	TOR signaling pathway regulator	TIPRL	13463	chr1
ENSG00000213064	4462.48782902192	-0.669163972984292	0.135556245891943	-4.93643039891877	7.95654141884272e-07	3.26969960595341e-06	SFT2 domain containing 2	SFT2D2	16834	chr1
ENSG00000143178	21.0747566371771	-0.38745597906116	0.285423205845066	-1.35747889844486	0.174629093851789	0.25189828606389	T-box 19	TBX19	16803	chr1
ENSG00000143153	1940.76475493696	-0.353636105826879	0.0520997028748628	-6.78767989668329	1.13951127664796e-11	7.44349600254414e-11	ATPase Na+/K+ transporting subunit beta 1	ATP1B1	26014	chr1
ENSG00000143156	565.469959861659	0.3828992116464	0.0917321424370442	4.17410082740827	2.99165250757197e-05	9.98048913019186e-05	NME/NM23 family member 7	NME7	235418	chr1
ENSG00000117475	1915.66035757773	1.31660039239793	0.0632685521597935	20.8097126843155	3.53456659468264e-96	1.66672071240843e-94	basic leucine zipper nuclear factor 1	BLZF1	9428	chr1
ENSG00000117477	143.526762227509	0.0933747604513863	0.143954395573532	0.648641259472279	0.516570280295892	0.611130830845073	coiled-coil domain containing 181	CCDC181	6070	chr1
ENSG00000117479	956.467321191013	-0.513674509498321	0.0676650778998191	-7.5914271503365	3.16401040432397e-14	2.54666469612398e-13	solute carrier family 19 member 2	SLC19A2	22060	chr1
ENSG00000000460	709.83165895018	-0.51957187630599	0.0877705623881507	-5.9196598742101	3.22608099820603e-09	1.70688569625521e-08	chromosome 1 open reading frame 112	C1orf112	54232	chr1
ENSG00000171806	378.164453754311	0.109011070871112	0.102097137004832	1.06771917478894	0.285647206343164	0.379229227873354	methyltransferase like 18	METTL18	2392	chr1
ENSG00000000457	680.789120738572	0.351765760494153	0.0775336946537183	4.53694051425271	5.70761972084402e-06	2.09969041740007e-05	SCY1 like pseudokinase 3	SCYL3	17531	chr1
ENSG00000075945	3194.7592594326	-0.00225464470257922	0.0447327527493975	-0.0504025476636822	0.959801606226727	0.971384701199979	kinesin associated protein 3	KIFAP3	104573	chr1
ENSG00000120370	749.345860554058	0.564051885029122	0.0814894548489352	6.92177762232867	4.46011014893881e-12	2.99874424560192e-11	golgin, RAB6 interacting	GORAB	7446	chr1
ENSG00000116132	2780.0885741076	0.188155067057066	0.0537885155709907	3.49805279174766	0.000468668353241407	0.00128523600688191	paired related homeobox 1	PRRX1	75229	chr1
ENSG00000076258	127.774405996817	0.415777825936393	0.154961818810787	2.68309851502241	0.0072943499510602	0.015637130118567	flavin containing monooxygenase 4	FMO4	27738	chr1
ENSG00000117523	3204.33045253206	-0.221811894911986	0.178498621756093	-1.24265326381667	0.213995633121566	0.298989063531595	proline rich coiled-coil 2C	PRRC2C	53541	chr1
ENSG00000117533	902.612051168002	-0.252686031266147	0.0818481151295262	-3.08725534932926	0.00202013983001024	0.00492464026445491	vesicle associated membrane protein 4	VAMP4	42084	chr1
ENSG00000010165	1147.299999803	0.154568287143025	0.0803812722559906	1.92293904792612	0.0544877050999727	0.0930610134055022	methyltransferase like 13	METTL13	16096	chr1
ENSG00000197959	797.768396470647	-0.439069963464459	0.0811702998910259	-5.40924407146366	6.32913255820883e-08	2.94679193742402e-07	dynamin 3	DNM3	467772	chr1
ENSG00000135845	796.176826956597	0.073675632916158	0.0714320283978497	1.0314089431398	0.302349088781513	0.397484181768994	phosphatidylinositol glycan anchor biosynthesis class C	PIGC	2634	chr1
ENSG00000094975	5391.03633984303	-0.0850197514350979	0.046638311947656	-1.82295944867213	0.0683095328872311	0.113309843430732	SUN domain containing ossification factor	SUCO	78714	chr1
ENSG00000117586	67.5551388112704	0.152783692304732	0.216586984710567	0.705414928366552	0.48055205648882	0.576829252653563	tumor necrosis factor superfamily member 4	TNFSF4	21828	chr1
ENSG00000117592	4901.97425801192	0.511201587524253	0.0426139405743809	11.9961116159153	3.72383863647483e-33	6.90759736474569e-32	peroxiredoxin 6	PRDX6	11461	chr1
ENSG00000162753	19.1298269973651	0.0745433733635067	0.292940940646968	0.254465535608904	0.799135926533841	0.84857825848104	solute carrier family 9 member C2 (putative)	SLC9C2	102630	chr1
ENSG00000183831	190.718560469688	0.571832872480655	0.134816369545528	4.24156854548398	2.21963077789356e-05	7.53233075948615e-05	ankyrin repeat domain 45	ANKRD45	61527	chr1
ENSG00000076321	1230.26426379332	0.20589942577479	0.0640414173614365	3.21509788911661	0.00130400046470597	0.00329470079527459	kelch like family member 20	KLHL20	18945	chr1
ENSG00000120334	608.756053791463	-0.249326523986035	0.0819281413946195	-3.04323422626074	0.00234050082022962	0.00562628115127289	centromere protein L	CENPL	25090	chr1
ENSG00000117593	1287.92428115941	-0.447718214298823	0.0618416537830043	-7.23975163843157	4.49507131305704e-13	3.27541486677231e-12	aspartyl-tRNA synthetase 2, mitochondrial	DARS2	33886	chr1
ENSG00000270084	38.8321372562386	-1.26072662895527	0.253973907216891	-4.96400060451339	6.90557280074726e-07	2.86640625591183e-06	GAS5 antisense RNA 1	GAS5-AS1	694	chr1
ENSG00000234741	2471.98433636377	-0.395786199632004	0.0516129316013055	-7.66835340199882	1.74218326261693e-14	1.4276931885869e-13	growth arrest specific 5 (non-protein coding)	GAS5	4087	chr1
ENSG00000185278	2999.66795005374	-0.213333298906846	0.0706681765547505	-3.01880293658865	0.00253775544007744	0.00605369867795684	zinc finger and BTB domain containing 37	ZBTB37	18282	chr1
ENSG00000135870	2373.97559709434	0.0681998723060216	0.0720247486138564	0.946894971777812	0.343692300409267	0.440990441340521	ring finger and CCCH-type domains 1	RC3H1	61859	chr1
ENSG00000152061	3234.78207789477	1.68754543570423	0.0725560150148959	23.2585187507579	1.16646278322269e-119	6.83527668578816e-118	RAB GTPase activating protein 1 like	RABGAP1L	295438	chr1
ENSG00000116161	2577.32490882879	-0.338545456010439	0.0496317754673828	-6.82114336677167	9.03187485681161e-12	5.94135309392422e-11	calcyclin binding protein	CACYBP	12593	chr1
ENSG00000120333	1559.80874811439	-0.0100719190925223	0.0583878774448872	-0.172500175263765	0.863044323585063	0.899258667644432	mitochondrial ribosomal protein S14	MRPS14	10498	chr1
ENSG00000120332	44.9195768891489	-0.958996678917034	0.234878360139875	-4.08295033372138	4.44675292227115e-05	0.000143793060901426	tenascin N	TNN	21212	chr1
ENSG00000235750	98.5745481587312	2.68475729870457	0.200247533431576	13.4071928512515	5.48769425118434e-41	1.23959932238446e-39	KIAA0040	KIAA0040	35827	chr1
ENSG00000116147	494.310600703944	0.57392183897776	0.102891359536345	5.57794008713656	2.43383445892796e-08	1.18066683745362e-07	tenascin R	TNR	420818	chr1
ENSG00000143207	2316.40960952861	-0.0282443251168813	0.0523917900161115	-0.539098303535642	0.589819026109686	0.675919766031107	ring finger and WD repeat domain 2	RFWD2	262404	chr1
ENSG00000116183	20.233371603955	0.652126840550187	0.28772399494772	2.26650141107863	0.0234207008578945	0.0445056873154427	pappalysin 2	PAPPA2	379664	chr1
ENSG00000152092	3131.61858352369	-0.298405173033175	0.0695465208359583	-4.29072755108819	1.78088696469101e-05	6.1280889288692e-05	astrotactin 1	ASTN1	228835	chr1
ENSG00000198797	599.211429224496	0.323599358978328	0.0815742153906508	3.96693192117929	7.28037772829368e-05	0.000228664925061119	BMP/retinoic acid inducible neural specific 2	BRINP2	25563	chr1
ENSG00000242193	45.3643696542175	-0.167134395722988	0.233484508864442	-0.715826486887075	0.474098495294046	0.57081752291894	quinone oxidoreductase-like protein 2 pseudogene	LOC730102	31868	chr1
ENSG00000224687	26.9411722955852	-0.495949303839485	0.267923320986482	-1.85108672889475	0.0641570770023068	0.107234737249947	RASAL2 antisense RNA 1	RASAL2-AS1	2093	chr1
ENSG00000075391	2130.33649950065	-0.227303743194905	0.0630645852774749	-3.60430092729227	0.000312994243646717	0.000885552400459046	RAS protein activator like 2	RASAL2	385785	chr1
ENSG00000213057	11.018268503237	-0.354792463515029	0.330470287180401	-1.07359867824169	0.283002590274466	0.376146083021153	chromosome 1 open reading frame 220	C1orf220	6094	chr1
ENSG00000116191	1352.81686962438	-0.397139662866029	0.0766938115425616	-5.17824912960069	2.23978003524774e-07	9.84561186241201e-07	Ral GEF with PH domain and SH3 binding motif 2	RALGPS2	154624	chr1
ENSG00000116194	4075.68544585836	3.99267321543553	0.0560507844112794	71.2331371874977	0	0	angiopoietin like 1	ANGPTL1	21546	chr1
ENSG00000116199	3598.74367691161	0.155117751585406	0.0449545622493589	3.45054525778679	0.00055945535606947	0.00151433557436276	FAM20B, glycosaminoglycan xylosylkinase	FAM20B	50629	chr1
ENSG00000186283	1152.80453745107	0.207304861055084	0.0697032048549231	2.97410802683404	0.00293841607392315	0.00691290393336028	torsin family 3 member A	TOR3A	14018	chr1
ENSG00000143322	2353.9124950929	0.516089820895119	0.0540009587577022	9.55704922223272	1.21161945488695e-21	1.47940108680834e-20	ABL proto-oncogene 2, non-receptor tyrosine kinase	ABL2	43763	chr1
ENSG00000057252	4046.7112141947	0.284984675471808	0.0446196840972264	6.38697205589411	1.69202542354995e-10	1.00282759444846e-09	sterol O-acyltransferase 1	SOAT1	64966	chr1
ENSG00000162779	21.4691290382472	-0.147219017570773	0.283340791525575	-0.519582855606883	0.603354350016575	0.687836035560237	axonemal dynein light chain domain containing 1	AXDND1	102998	chr1
ENSG00000169905	6554.65724716326	-0.0169970014755949	0.047441334319728	-0.358274102516693	0.720138196710895	0.786041129306106	torsin 1A interacting protein 2	TOR1AIP2	37840	chr1
ENSG00000143337	4566.74843658765	0.433970624468408	0.0418712689886961	10.3644010547081	3.60006727260473e-25	5.09797190625169e-24	torsin 1A interacting protein 1	TOR1AIP1	38036	chr1
ENSG00000135837	5518.5187376706	-0.00329523319366227	0.0593061055372637	-0.0555631357650316	0.955689832511938	0.96818581738353	centrosomal protein 350	CEP350	25592	chr1
ENSG00000116260	2617.71206802084	-0.0434824257376892	0.0536040615874256	-0.811177818433992	0.417263561938455	0.515687979610666	quiescin sulfhydryl oxidase 1	QSOX1	43202	chr1
ENSG00000230124	1930.82797176683	-0.244303409879096	0.0565181270512098	-4.32256733592284	1.5422399179023e-05	5.3410163328936e-05	LHX4 antisense RNA 1	LHX4-AS1	5019	chr1
ENSG00000143324	6925.19380704815	-0.234642468878119	0.0439013827140482	-5.34476261047319	9.05356283607366e-08	4.13822283026148e-07	xenotropic and polytropic retrovirus receptor 1	XPR1	204727	chr1
ENSG00000135835	129.511991513086	-0.193896175657325	0.153577241827624	-1.26253195688301	0.20675743462043	0.290609983125163	KIAA1614	KIAA1614	22357	chr1
ENSG00000135823	3724.13591242058	-0.130278954999793	0.0463468054800586	-2.81095867666322	0.0049394129330914	0.0110664658659327	syntaxin 6	STX6	49871	chr1
ENSG00000153029	19.3649265450096	1.37344262981532	0.302273043983651	4.54371521758851	5.52713182296569e-06	2.03864843773069e-05	major histocompatibility complex, class I-related	MR1	28514	chr1
ENSG00000162783	4696.45747144621	-0.168716896465843	0.0429619714737511	-3.92712184004231	8.59684372805953e-05	0.000267255929881185	immediate early response 5	IER5	2342	chr1
ENSG00000198216	40.4157109775264	0.344587622775438	0.232891684297795	1.47960466606794	0.138978780541307	0.208126370988132	calcium voltage-gated channel subunit alpha1 E	CACNA1E	141618	chr1
ENSG00000135821	53508.1551498514	-0.386499239941215	0.0465433333191461	-8.30407305147231	1.00601734703298e-16	9.43688743817606e-16	glutamate-ammonia ligase	GLUL	10503	chr1
ENSG00000135828	531.262935781754	1.07011300817481	0.103211672976382	10.3681393520255	3.46199886884803e-25	4.90741843706647e-24	ribonuclease L	RNASEL	11140	chr1
ENSG00000143333	364.429804907774	1.04616455809511	0.127270332923562	8.22001902614202	2.03470898581576e-16	1.8735108051512e-15	regulator of G-protein signaling 16	RGS16	2899	chr1
ENSG00000261504	17.2982794800787	1.30787600050239	0.311186638281627	4.20286683170102	2.6355565273155e-05	8.83883361232125e-05	uncharacterized LOC284648	LOC284648	1490	chr1
ENSG00000135824	43.7537033489188	1.16987477434237	0.251979230187734	4.64274287000071	3.43814121941281e-06	1.30597146129309e-05	regulator of G-protein signaling 8	RGS8	26276	chr1
ENSG00000135838	108.450421703146	-0.190395570296749	0.173586418604536	-1.09683448640361	0.272713751710532	0.364546730238236	N-acetylneuraminate pyruvate lyase	NPL	32751	chr1
ENSG00000135829	14439.7710952212	-0.10257871833926	0.0424606272570645	-2.41585499239635	0.0156983117252534	0.0311541527153427	DEAH-box helicase 9	DHX9	48679	chr1
ENSG00000135862	16988.5685678972	-0.220005186729137	0.0370437075562417	-5.93907039124292	2.86642779682289e-09	1.52466089230932e-08	laminin subunit gamma 1	LAMC1	122133	chr1
ENSG00000058085	13.067433789572	1.52027038601952	0.337073182107093	4.51020866304489	6.47638897669992e-06	2.35956887665667e-05	laminin subunit gamma 2	LAMC2	55233	chr1
ENSG00000157064	65.6653388099124	0.141162193672167	0.215311263485429	0.655619178425936	0.512069182605361	0.606933725659113	nicotinamide nucleotide adenylyltransferase 2	NMNAT2	56638	chr1
ENSG00000116698	460.401511523543	0.254451928952863	0.100957943764994	2.52037550948112	0.0117229697907897	0.0240064617517194	SMG7, nonsense mediated mRNA decay factor	SMG7	81823	chr1
ENSG00000116701	12.1532170036321	2.4339509839105	0.349124393535332	6.97158671516368	3.13386054773213e-12	2.14096180346285e-11	neutrophil cytosolic factor 2	NCF2	35043	chr1
ENSG00000162704	5615.56242988292	0.231272548003177	0.047760851146694	4.8423037372772	1.28342378598096e-06	5.15319670947917e-06	actin related protein 2/3 complex subunit 5	ARPC5	9749	chr1
ENSG00000143344	4474.34533604169	0.364565185326855	0.046785516219207	7.79226595724061	6.58180102296513e-15	5.54288173942434e-14	ral guanine nucleotide dissociation stimulator like 1	RGL1	123392	chr1
ENSG00000198756	22099.7152365994	-0.0502679811921482	0.0423837942090298	-1.18601890487281	0.235614833824354	0.32373057467969	collagen beta(1-O)galactosyltransferase 2	COLGALT2	101898	chr1
ENSG00000198860	2670.47849410917	-0.0108155889721659	0.0533562207553959	-0.202705304443291	0.839365376905906	0.880283967617733	tRNA splicing endonuclease subunit 15	TSEN15	22534	chr1
ENSG00000116667	4821.73687932074	-0.44206568483691	0.0473703989837772	-9.3321081164696	1.03785735796954e-20	1.20724188524613e-19	chromosome 1 open reading frame 21	C1orf21	242006	chr1
ENSG00000116406	5265.28276617616	-0.240504848611383	0.0481463793756627	-4.99528420890885	5.8749182858458e-07	2.45679995799554e-06	ER degradation enhancing alpha-mannosidase like protein 3	EDEM3	64417	chr1
ENSG00000135842	2220.18196909622	0.845807778493902	0.0639392959053674	13.2282935950019	6.02395129664022e-40	1.337011694286e-38	family with sequence similarity 129 member A	FAM129A	166911	chr1
ENSG00000121481	2703.36322061924	0.14330280746387	0.0517737692366266	2.76786507099607	0.00564248108130251	0.0124347675127682	ring finger protein 2	RNF2	57190	chr1
ENSG00000121486	974.998889642302	0.184885419487515	0.0775120657599587	2.3852469634866	0.0170676592968594	0.0335719899511961	tRNA methyltransferase 1 like	TRMT1L	38899	chr1
ENSG00000116668	824.596314800974	0.00899522681759576	0.0787747900314017	0.11418915637871	0.909087847638943	0.933292155584396	SWT1, RNA endoribonuclease homolog	SWT1	134623	chr1
ENSG00000116679	8097.99558846116	0.265888236151412	0.0393538394051617	6.75634805066919	1.41513241637188e-11	9.17968017197228e-11	influenza virus NS1A binding protein	IVNS1ABP	10111	chr1
ENSG00000143341	50.785907338798	-0.723243166901755	0.218488763906513	-3.31020760047513	0.000932267989067387	0.00242189077849912	hemicentin 1	HMCN1	36365	chr1
ENSG00000116690	21.5833269010501	-0.199928310592721	0.28402259299461	-0.703916926061283	0.481484509974316	0.577773161013648	proteoglycan 4	PRG4	18284	chr1
ENSG00000047410	11180.4800629831	-0.264543986627365	0.0504182234418293	-5.24699143619342	1.54603082470709e-07	6.9109995850695e-07	translocated promoter region, nuclear basket protein	TPR	18458	chr1
ENSG00000157181	1777.51333686532	0.0928505178730995	0.0539581351346977	1.72078811918376	0.0852892791089918	0.137280353283695	chromosome 1 open reading frame 27	C1orf27	41605	chr1
ENSG00000073756	472.151599602225	4.01148070349696	0.260377126337119	15.4064251339158	1.48185794117488e-53	4.35996228280551e-52	prostaglandin-endoperoxide synthase 2	PTGS2	8616	chr1
ENSG00000116711	1977.53291733058	1.0685490570193	0.052662907384701	20.2903544465098	1.56463147720607e-91	7.09147697031425e-90	phospholipase A2 group IVA	PLA2G4A	160082	chr1
ENSG00000162670	3923.59403313446	-0.217171033501115	0.0472752827408526	-4.5937543026781	4.35341917745361e-06	1.63326106563723e-05	BMP/retinoic acid inducible neural specific 3	BRINP3	378146	chr1
ENSG00000116741	404.507745733844	0.180373725819177	0.105885938717942	1.7034719435189	0.0884797841653095	0.141877647954564	regulator of G-protein signaling 2	RGS2	3239	chr1
ENSG00000116750	923.058248077344	-0.0621337729320914	0.0741404447298716	-0.838055034043482	0.401999795483083	0.500397867757589	ubiquitin C-terminal hydrolase L5	UCHL5	40989	chr1
ENSG00000116747	18374.8760757868	-0.318792759595788	0.0458758401869836	-6.94903370262937	3.67796683990398e-12	2.49201381678061e-11	TROVE domain family member 2	TROVE2	31903	chr1
ENSG00000023572	274.273333630334	-0.0926798746816626	0.116880112089117	-0.792948201581096	0.427808002324151	0.526257117759861	glutaredoxin 2	GLRX2	9014	chr1
ENSG00000134371	2067.80359859748	0.353590726930373	0.0659062659401516	5.36505477721137	8.09246564556195e-08	3.72200267212135e-07	cell division cycle 73	CDC73	132855	chr1
ENSG00000162630	194.996554118416	-0.296946064745244	0.131654072309418	-2.25550231402908	0.0241018171964766	0.0456389872683416	beta-1,3-galactosyltransferase 2	B3GALT2	7884	chr1
ENSG00000162687	735.400005532527	1.55759081352333	0.0952376851127313	16.3547739708251	4.02197979136086e-60	1.35078721769805e-58	potassium sodium-activated channel subfamily T member 2	KCNT2	382587	chr1
ENSG00000000971	113.364129245769	4.92958198573429	0.275908415834497	17.8667329549356	2.14176027026995e-71	8.1068520500353e-70	complement factor H	CFH	49688	chr1
ENSG00000134389	65.981387494317	-0.503374746505844	0.203865303967951	-2.46915358674754	0.0135433076414454	0.0273266133868957	complement factor H related 5	CFHR5	32137	chr1
ENSG00000066279	4030.15965214246	-0.678814580289225	0.0604792352435865	-11.2239279738778	3.11136811947607e-29	5.07272532168363e-28	abnormal spindle microtubule assembly	ASPM	62568	chr1
ENSG00000177888	3032.16395985226	-0.226765010903132	0.0546068882867536	-4.15268142935256	3.28602043715277e-05	0.000108693236236005	zinc finger and BTB domain containing 41	ZBTB41	46859	chr1
ENSG00000134376	1415.35536162272	-0.335144924114139	0.0632643947700376	-5.29752833852866	1.17380692791246e-07	5.3080936472115e-07	crumbs 1, cell polarity complex component	CRB1	210252	chr1
ENSG00000213047	743.245679715919	-0.311971278251009	0.0819511783267807	-3.80679429656303	0.000140779744449487	0.000424004370110766	DENN domain containing 1B	DENND1B	223239	chr1
ENSG00000203724	32.3357680147045	0.0855250383514499	0.258091506624691	0.331374865720854	0.740361347677439	0.802214050599025	chromosome 1 open reading frame 53	C1orf53	4816	chr1
ENSG00000151414	1186.44771140611	0.113033241664435	0.0632680237845477	1.78657771972391	0.0740057654159675	0.12149229218739	NIMA related kinase 7	NEK7	165421	chr1
ENSG00000203721	19.3428843727885	-0.345493204030931	0.292686050040585	-1.18042251751672	0.237832210497177	0.326265070821135	long intergenic non-protein coding RNA 862	LINC00862	31249	chr1
ENSG00000162702	1857.98244229185	0.0303281119870885	0.0554265308502067	0.547176803633118	0.58425727084783	0.670960479541782	zinc finger protein 281	ZNF281	3747	chr1
ENSG00000118193	1764.39999644489	-0.64426854777345	0.0533169859271866	-12.0837391043317	1.28729822124809e-33	2.41994786423885e-32	kinesin family member 14	KIF14	69238	chr1
ENSG00000118197	1046.79525242615	0.0116426822413258	0.0650072744907563	0.179098144515831	0.857860638914157	0.895322918845873	DEAD-box helicase 59	DDX59	29008	chr1
ENSG00000118200	6370.70148184767	-0.264451901643416	0.0578377516546451	-4.57230604713829	4.82385668381006e-06	1.79484890692773e-05	calmodulin regulated spectrin associated protein family member 2	CAMSAP2	121146	chr1
ENSG00000163362	592.004705074542	0.867780739081187	0.0870637622037335	9.96718631398603	2.12153854931315e-23	2.78725585207605e-22	chromosome 1 open reading frame 106	C1orf106	20916	chr1
ENSG00000116852	922.045900297085	-0.683843288897253	0.0907584500249009	-7.53476165260238	4.89227595641789e-14	3.87755092074887e-13	kinesin family member 21B	KIF21B	54315	chr1
ENSG00000116857	3167.71472717281	0.0810706586616211	0.0490190220151249	1.65386120181277	0.0981557173435598	0.154892486917922	transmembrane protein 9	TMEM9	36803	chr1
ENSG00000174307	924.455331635394	-0.202966747616132	0.0766992771532546	-2.64626675960164	0.00813856082809991	0.0172933613105051	pleckstrin homology like domain family A member 3	PHLDA3	3693	chr1
ENSG00000159176	522.332042467973	-0.493128075757166	0.100008614283305	-4.93085599966649	8.18700698500516e-07	3.36144921797119e-06	cysteine and glycine rich protein 1	CSRP1	23310	chr1
ENSG00000134369	5967.60151506929	-0.14985687324811	0.12524545894449	-1.19650544228137	0.23149937607356	0.319171959235106	neuron navigator 1	NAV1	87140	chr1
ENSG00000198700	9140.36557954833	-0.0596689651420062	0.0447101269886197	-1.3345738238944	0.182015869980024	0.260700783296199	importin 9	IPO9	55135	chr1
ENSG00000198892	2579.49578803889	-0.179841042429308	0.0598183034752562	-3.00645508115588	0.00264313101341667	0.00628105937982782	shisa family member 4	SHISA4	3911	chr1
ENSG00000163431	16.8033317323784	-0.619215634786628	0.309197684885397	-2.00265288213959	0.04521455950073	0.0792230584020672	leiomodin 1	LMOD1	50133	chr1
ENSG00000134375	2165.06586303649	0.0570902556467103	0.0526101005950891	1.08515769787445	0.277851816336557	0.370389747553159	translocase of inner mitochondrial membrane 17 homolog A (yeast)	TIMM17A	15171	chr1
ENSG00000176393	915.409686297489	-0.0308775265845938	0.0734118259936561	-0.420606982140208	0.67404209440194	0.747084493306106	arginyl aminopeptidase	RNPEP	23510	chr1
ENSG00000170075	2074.16652407983	-0.105135975829049	0.187438461204465	-0.560909298729054	0.574859370663935	0.662571433309885	G protein-coupled receptor 37 like 1	GPR37L1	6606	chr1
ENSG00000143862	4312.53077480466	0.000563644424776009	0.0475676185651317	0.0118493303170989	0.990545823522826	0.993383047507138	ADP ribosylation factor like GTPase 8A	ARL8A	11340	chr1
ENSG00000133067	54.4812306197587	-1.2687013412068	0.252471117482851	-5.02513457323677	5.03079639048427e-07	2.12217781472085e-06	leucine rich repeat containing G protein-coupled receptor 6	LGR6	125772	chr1
ENSG00000077152	618.999994312967	-0.532845178571946	0.082255422927668	-6.47793372894706	9.29871749162421e-11	5.5916074912064e-10	ubiquitin conjugating enzyme E2 T	UBE2T	10310	chr1
ENSG00000077157	1003.5614882941	-0.390822515312897	0.0835288663967772	-4.67889164754637	2.88429804405922e-06	1.11096243418728e-05	protein phosphatase 1 regulatory subunit 12B	PPP1R12B	89541	chr1
ENSG00000117139	6027.11533048189	-0.0139618309969394	0.0418922381546133	-0.333279662581168	0.738923189609237	0.800924960808219	lysine demethylase 5B	KDM5B	81018	chr1
ENSG00000234996	19.0989317290154	-0.566461308792145	0.30878103568345	-1.83450809256582	0.0665786076392039	0.110845625295655	actin pseudogene	LOC148709	13488	chr1
ENSG00000183155	641.745470254762	-0.0618710499516659	0.0785783145739486	-0.78738072058596	0.431059029274104	0.529034085848274	RAB interacting factor	RABIF	10976	chr1
ENSG00000117153	3583.70027703743	-0.0537228000018826	0.0533086447421089	-1.00776900748044	0.313565367721047	0.409729704696143	kelch like family member 12	KLHL12	27287	chr1
ENSG00000159346	2964.20817379987	-0.00179879139123815	0.0507958541679591	-0.0354121693729247	0.971751081042581	0.980078776465602	adiponectin receptor 1	ADIPOR1	7598	chr1
ENSG00000159348	1235.52729160438	0.0893159636264055	0.0696568732688906	1.2822275740346	0.199762826044777	0.282194712402371	cytochrome b5 reductase 1	CYB5R1	4211	chr1
ENSG00000163444	1962.75583725148	0.00703935099508422	0.0624165088213244	0.11278027445007	0.910204757262478	0.934218953863027	transmembrane protein 183A	TMEM183A	16664	chr1
ENSG00000143847	222.538246235963	0.323510530142137	0.122173701528696	2.64795554275772	0.00809801738126626	0.0172202753453741	PTPRF interacting protein alpha 4	PPFIA4	33369	chr1
ENSG00000163485	1581.28118791992	0.571731057882586	0.0578248449418026	9.88729080826764	4.72645683405001e-23	6.11209861134538e-22	adenosine A1 receptor	ADORA1	39128	chr1
ENSG00000133048	204.834761473611	3.12093121534756	0.184287112577274	16.9351571669935	2.47695956059312e-64	8.82692586414928e-63	chitinase 3 like 1	CHI3L1	3204	chr1
ENSG00000159388	2378.23931439109	-0.142765704696988	0.0563738354138753	-2.53248166722835	0.0113258292128067	0.0233056476822448	BTG anti-proliferation factor 2	BTG2	4066	chr1
ENSG00000058668	2267.19090396169	-0.0816845577844643	0.144022753348571	-0.567164256239202	0.570602590078013	0.659292902734311	ATPase plasma membrane Ca2+ transporting 4	ATP2B4	117295	chr1
ENSG00000182004	1760.68599322006	-0.0349184012838906	0.0619304581640402	-0.563832439143263	0.572868172739926	0.660929134131532	small nuclear ribonucleoprotein polypeptide E	SNRPE	9541	chr1
ENSG00000143842	565.454453945778	0.820612358865816	0.0906457650489392	9.05295860675643	1.39146051005973e-19	1.524836028434e-18	SRY-box 13	SOX13	11679	chr1
ENSG00000143845	206.14778146032	-0.0481779943863709	0.133021861757886	-0.362181026108776	0.71721675741601	0.783513614505513	ethanolamine kinase 2	ETNK2	21118	chr1
ENSG00000143850	98.8294092205994	0.0969667897864239	0.198525215721135	0.488435634910134	0.625241306205911	0.70713918221867	pleckstrin homology domain containing A6	PLEKHA6	8686	chr1
ENSG00000158615	4315.92880914449	0.149518722913366	0.0451749467474661	3.30977087254125	0.000933723715114835	0.00242522266880253	protein phosphatase 1 regulatory subunit 15B	PPP1R15B	8453	chr1
ENSG00000133056	1549.98345102099	-0.312235822349846	0.0842725878868586	-3.70506982376099	0.000211332508763917	0.000617120889332497	phosphatidylinositol-4-phosphate 3-kinase catalytic subunit type 2 beta	PIK3C2B	35678	chr1
ENSG00000198625	1929.25225989377	-0.0655896938653823	0.0739480093691603	-0.886970378579741	0.375094848508911	0.472466936061949	MDM4, p53 regulator	MDM4	41742	chr1
ENSG00000170382	1723.05001046357	-0.0143558047926022	0.142875939904422	-0.100477412797464	0.919965314055354	0.942523644170561	leucine rich repeat neuronal 2	LRRN2	68295	chr1
ENSG00000163531	476.111231151372	1.95551832724192	0.0967898567303946	20.2037526792602	9.0733140224412e-91	4.07281291295798e-89	neurofascin	NFASC	32908	chr1
ENSG00000184144	477.875944746524	4.2274042779949	0.145612876539446	29.0318025332719	2.61194945303021e-185	2.3152121575752e-183	contactin 2	CNTN2	34832	chr1
ENSG00000174529	75.4369912914131	-0.308472508574767	0.213592834970655	-1.44420812906551	0.14868043894132	0.220066534281673	transmembrane protein 81	TMEM81	1332	chr1
ENSG00000117222	1251.06063877491	0.0459578803185434	0.0677231900787426	0.678613636851833	0.497382700011109	0.593393365163607	RB binding protein 5, histone lysine methyltransferase complex subunit	RBBP5	35881	chr1
ENSG00000133059	2163.08216133588	0.160161828948471	0.0528339572782682	3.03141837558984	0.00243407721440462	0.00583120961131315	dual serine/threonine and tyrosine protein kinase	DSTYK	69097	chr1
ENSG00000133069	175.262505922249	-0.206912757883896	0.135518786140983	-1.52681974046492	0.126805841456121	0.192824735026381	transmembrane and coiled-coil domain family 2	TMCC2	17143	chr1
ENSG00000163545	255.01846226717	1.04863023816092	0.139908194504645	7.49513094550089	6.62322075174076e-14	5.19362859060075e-13	NUAK family kinase 2	NUAK2	19693	chr1
ENSG00000162873	12492.4990411076	0.0617943566085508	0.0370842365554752	1.66632408668063	0.095648881759538	0.151619987441124	kelch domain containing 8A	KLHDC8A	21026	chr1
ENSG00000186007	553.793077977585	-0.210242353391782	0.0859538970768955	-2.4459897752361	0.0144455097115577	0.0289634020773609	LEM domain containing 1	LEMD1	40709	chr1
ENSG00000117266	63.627859924766	2.59390765509871	0.23682784104409	10.9527141896117	6.44858606021567e-28	1.01588805144342e-26	cyclin dependent kinase 18	CDK18	6867	chr1
ENSG00000174514	98.3734165796354	-0.693903659030004	0.177380190533733	-3.91195689294313	9.15512559110134e-05	0.000283103408927742	major facilitator superfamily domain containing 4A	MFSD4A	33935	chr1
ENSG00000158711	1267.65104155215	0.285048278417479	0.0913775691447062	3.11945569449407	0.00181185507125584	0.0044572334925238	ELK4, ETS transcription factor	ELK4	56827	chr1
ENSG00000158715	63.1537000004746	-0.0405745081441492	0.19722661042059	-0.205725323056677	0.837005476704182	0.878834514553465	solute carrier family 45 member 3	SLC45A3	56827	chr1
ENSG00000069275	26648.4160091506	-0.359455647030647	0.0403662203539139	-8.90486262719404	5.34521992257572e-19	5.72322668315543e-18	nuclear casein kinase and cyclin dependent kinase substrate 1	NUCKS1	37426	chr1
ENSG00000117280	3764.85340212983	0.126632351799213	0.0474076932905452	2.67113506289216	0.00755952227618441	0.0161536633320053	RAB29, member RAS oncogene family	RAB29	7497	chr1
ENSG00000133065	1839.84232638284	0.0319407410824572	0.083350463456981	0.383210119748674	0.701563975236826	0.770559444215492	solute carrier family 41 member 1	SLC41A1	6776	chr1
ENSG00000196550	69.43773455451	-0.327845955063042	0.199143034881442	-1.64628381433587	0.099705340238922	0.156922487476277	family with sequence similarity 72 member D	FAM72D	16692	chr1
ENSG00000266028	3872.31011127249	0.00522461634515552	0.068682548886008	0.0760690514533289	0.939364162140243	0.95671551820043	SLIT-ROBO Rho GTPase activating protein 2	SRGAP2	121584	chr1
ENSG00000263528	2586.28520745025	0.0236801906227187	0.0493300939883962	0.480035384248181	0.631202232743667	0.712044280734444	inhibitor of kappa light polypeptide gene enhancer in B-cells, kinase epsilon	IKBKE	26638	chr1
ENSG00000266094	96.9978305778878	0.798644727397338	0.169975645825708	4.69858327949091	2.61972364812644e-06	1.01688552361449e-05	Ras association domain family member 5	RASSF5	6004	chr1
ENSG00000143486	1201.51546453487	-0.382324761922764	0.0667780152734879	-5.72530885137813	1.03245735987499e-08	5.20502711484855e-08	eukaryotic translation initiation factor 2D	EIF2D	20931	chr1
ENSG00000143479	225.634169129104	0.374961886273933	0.118960082633557	3.15199752701047	0.00162157646682526	0.00401807827634248	dual specificity tyrosine phosphorylation regulated kinase 3	DYRK3	13662	chr1
ENSG00000162889	2779.5901351752	0.189850408905735	0.0490397273782391	3.87135938667513	0.000108230084101407	0.000331531567769073	mitogen-activated protein kinase-activated protein kinase 2	MAPKAPK2	49266	chr1
ENSG00000123836	2154.69428869101	-0.679775303596986	0.0562948011401661	-12.0752767543213	1.42683386520785e-33	2.67866062764556e-32	6-phosphofructo-2-kinase/fructose-2,6-biphosphatase 2	PFKFB2	24543	chr1
ENSG00000180667	1088.73170152524	0.0256279679015926	0.0650708453055894	0.393847164290507	0.693693880748869	0.76377223269559	YOD1 deubiquitinase	YOD1	9132	chr1
ENSG00000197721	7.58523361492248	2.0059863245946	0.355339261249703	5.6452707126696	1.64921533639528e-08	8.12997563752761e-08	complement C3b/C4b receptor 1 like	CR1L	47320	chr1
ENSG00000117335	1690.70232907863	0.0751531582757836	0.0605801110474923	1.24055827855559	0.214768972581215	0.299764745963715	CD46 molecule	CD46	43479	chr1
ENSG00000203709	42.8924360358795	-0.141126970634151	0.232361095857347	-0.607360582947127	0.54361164116213	0.635711509224752	microRNA 29c	MIR29C	672	chr1
ENSG00000076356	1902.89282371097	0.466836687908035	0.0613660492327618	7.60740985845969	2.79643425745902e-14	2.25729462684228e-13	plexin A2	PLXNA2	8748	chr1
ENSG00000123689	32.3915619788832	-0.580117978823485	0.259336070403237	-2.23693517805475	0.0252905769774952	0.0476516252616467	G0/G1 switch 2	G0S2	1066	chr1
ENSG00000162757	259.605953155804	0.109875599087826	0.123966768724251	0.886331072581479	0.375439149792828	0.472801483036467	chromosome 1 open reading frame 74	C1orf74	2229	chr1
ENSG00000117597	725.006444189681	0.363182807529537	0.0749479201314327	4.84580235038731	1.26101008657345e-06	5.07095033331901e-06	digestive organ expansion factor homolog (zebrafish)	DIEXF	29599	chr1
ENSG00000143469	1255.17565994343	0.35026251595808	0.0629682740281258	5.56252368933646	2.65900921955724e-08	1.28411807309997e-07	synaptotagmin 14	SYT14	226115	chr1
ENSG00000082497	13.3330814545244	0.430438004840906	0.317465871169931	1.35585599565285	0.175144990850348	0.25246043607031	SERTA domain containing 4	SERTAD4	10246	chr1
ENSG00000054392	441.664839286666	0.451057393389043	0.0921313057948332	4.89581027314973	9.79014878080216e-07	3.99004594841329e-06	hedgehog acyltransferase	HHAT	346999	chr1
ENSG00000143473	11.6090965592675	-0.582653633150268	0.331887852410681	-1.75557384495437	0.0791612014339361	0.128793288345989	potassium voltage-gated channel subfamily H member 1	KCNH1	455801	chr1
ENSG00000117625	1215.42110939933	-0.119080882474142	0.0682394274741344	-1.74504515764408	0.0809770087299928	0.131244416996129	REST corepressor 3	RCOR3	53948	chr1
ENSG00000082512	855.330900974347	0.270044624062563	0.07877275897801	3.42814733882747	0.000607715538465572	0.0016345412168639	TNF receptor associated factor 5	TRAF5	48330	chr1
ENSG00000170385	6275.03467551522	-0.120155008821139	0.120645448697498	-0.995934866323978	0.31928179317527	0.415686670393201	solute carrier family 30 member 1	SLC30A1	3719	chr1
ENSG00000117650	875.964142863683	-0.805489509386723	0.0708894315103658	-11.3626177023149	6.41918555702063e-30	1.06014969016597e-28	NIMA related kinase 2	NEK2	17374	chr1
ENSG00000123684	2158.88044704013	-0.157039734843662	0.0594261127912996	-2.64260486623406	0.00822709841899343	0.0174682403514256	lysophosphatidylglycerol acyltransferase 1	LPGAT1	87316	chr1
ENSG00000143493	1369.84845674955	0.105744546082182	0.0621458627413598	1.70155407645192	0.0888389925247845	0.142372135291178	integrator complex subunit 7	INTS7	95262	chr1
ENSG00000143476	2156.01119872607	-0.839149730772087	0.0609313982044564	-13.7720412710095	3.75452631927965e-43	8.83733463890949e-42	denticleless E3 ubiquitin protein ligase homolog	DTL	69269	chr1
ENSG00000066027	2480.09531388664	-0.156925162003632	0.0491656675691882	-3.19176306886914	0.00141407275198728	0.00354911987304333	protein phosphatase 2 regulatory subunit B'alpha	PPP2R5A	76327	chr1
ENSG00000065600	2274.62048069155	0.28777357203673	0.0553397079952411	5.20012812610931	1.99151194373119e-07	8.80679658097735e-07	transmembrane protein 206	TMEM206	50452	chr1
ENSG00000117691	1574.61481815842	0.0467389228807972	0.0703619114681006	0.664264541789585	0.506521011127798	0.602039103865298	neudesin neurotrophic factor	NENF	13493	chr1
ENSG00000162772	1264.40725915974	4.37506773001851	0.0933581547990412	46.8632626623362	0	0	activating transcription factor 3	ATF3	12150	chr1
ENSG00000123685	75.0747710055913	1.76025111625704	0.206369123929778	8.52962440668215	1.46823626882542e-17	1.44198099192847e-16	basic leucine zipper ATF-like transcription factor 3	BATF3	13569	chr1
ENSG00000117697	2609.47259055487	0.0903776630417193	0.0511003961880649	1.7686293998407	0.0769557411382407	0.125628296379655	NSL1, MIS12 kinetochore complex component	NSL1	65645	chr1
ENSG00000203705	606.60351101929	-0.208296834439097	0.0807542510849133	-2.57939156936856	0.00989745251720345	0.020596407504225	TatD DNase domain containing 3	TATDN3	24998	chr1
ENSG00000198468	98.4344840087796	0.0548581354743272	0.166107967180718	0.330255895640719	0.741206615192193	0.802790118940716	FLVCR1 antisense RNA 1 (head to head)	FLVCR1-AS1	1535	chr1
ENSG00000162769	1170.4410183407	-0.0625493687475862	0.0667710906841038	-0.936773206888432	0.348875230153724	0.446332109098649	feline leukemia virus subgroup C cellular receptor 1	FLVCR1	41109	chr1
ENSG00000143494	230.658042087646	-0.290023333046721	0.148754245123574	-1.94968105149397	0.0512141461518149	0.0883535497482345	vasohibin 2	VASH2	41041	chr1
ENSG00000174606	2759.40218999431	0.157382802922468	0.0535977249051646	2.93637095979241	0.00332076947654897	0.0077152250363418	angel homolog 2	ANGEL2	23645	chr1
ENSG00000136643	3754.7723839027	0.86040738813253	0.0450617788716797	19.0939507866006	2.83495752887683e-81	1.18872994586587e-79	ribosomal protein S6 kinase C1	RPS6KC1	222221	chr1
ENSG00000117707	1743.71199615703	0.546639341156149	0.0722437254425966	7.56659956013062	3.83120578928746e-14	3.06430822838212e-13	prospero homeobox 1	PROX1	53570	chr1
ENSG00000143499	930.064054351977	0.19696192144756	0.0720009290310373	2.73554694499367	0.00622767025535913	0.013574867225884	SET and MYND domain containing 2	SMYD2	55913	chr1
ENSG00000152104	1948.77924879124	-0.32472131330237	0.0561035035407017	-5.78789724008578	7.12729882273571e-09	3.64961823894441e-08	protein tyrosine phosphatase, non-receptor type 14	PTPN14	23406	chr1
ENSG00000117724	13401.9127276015	-0.569839896237466	0.0580274653768925	-9.82017554163905	9.21828827973624e-23	1.18117225395888e-21	centromere protein F	CENPF	61383	chr1
ENSG00000082482	653.246523352111	-0.331264920558441	0.0885835943979092	-3.73957415941411	0.000184332261874874	0.000544291234990008	potassium two pore domain channel subfamily K member 2	KCNK2	111876	chr1
ENSG00000136636	4019.75004771521	0.100444439235454	0.04404926584737	2.28027498990544	0.0225913841660931	0.0431346060321928	potassium channel tetramerization domain containing 3	KCTD3	54415	chr1
ENSG00000042781	38.3921255289738	1.2991792761408	0.247000224754182	5.25983033996736	1.4418837674242e-07	6.45987913076646e-07	usherin	USH2A	800503	chr1
ENSG00000196482	285.677788234162	-0.67379371744091	0.141492227830258	-4.76205462146818	1.91631793534102e-06	7.5472532858411e-06	estrogen related receptor gamma	ESRRG	634510	chr1
ENSG00000092978	1642.45673934632	-0.124675672628039	0.0595397189408788	-2.0939916218254	0.0362607265927619	0.0653411574796231	G-patch domain containing 2	GPATCH2	57960	chr1
ENSG00000162814	62.4666270581809	0.564437003474006	0.217385705033902	2.596477093036	0.00941851856213445	0.0197081058512914	spermatogenesis associated 17	SPATA17	235790	chr1
ENSG00000067533	1459.37118571763	-0.134796207061471	0.0602922718538082	-2.23571285202711	0.0253705866272117	0.0477766660903724	ribosomal RNA processing 15 homolog	RRP15	52697	chr1
ENSG00000232480	35.5340720257858	-0.358566857295748	0.243835164847567	-1.47052972248652	0.141418341849676	0.211102523726787	TGFB2 antisense RNA 1 (head to head)	TGFB2-AS1	1483	chr1
ENSG00000092969	7732.04863164338	-0.447480987664314	0.042342953127394	-10.5680155637235	4.19272437832734e-26	6.16797320572209e-25	transforming growth factor beta 2	TGFB2	66531	chr1
ENSG00000143353	1293.63318140387	0.0479318866106369	0.0795342543901792	0.602657144121734	0.546736796864387	0.6384066066438	lysophospholipase like 1	LYPLAL1	39016	chr1
ENSG00000196660	118.942721093196	-1.20611934242538	0.163629946447291	-7.37101837782423	1.69329497231687e-13	1.27703802301011e-12	solute carrier family 30 member 10	SLC30A10	14388	chr1
ENSG00000136628	6960.85183479051	-0.112837591808175	0.0413486334757413	-2.72893158305644	0.0063539885068484	0.0138158064024859	glutamyl-prolyl-tRNA synthetase	EPRS	45521	chr1
ENSG00000162813	784.369256576337	-0.373932787682775	0.0799073952868583	-4.67957673179559	2.87467760545748e-06	1.10817120463617e-05	3'(2'), 5'-bisphosphate nucleotidase 1	BPNT1	32368	chr1
ENSG00000067704	3183.42797897281	-0.359538010387636	0.0459565904927157	-7.8234265539047	5.1404553087666e-15	4.37110361865672e-14	isoleucyl-tRNA synthetase 2, mitochondrial	IARS2	53929	chr1
ENSG00000118873	9051.80464290367	-0.10194011767115	0.0498844596829718	-2.04352454289382	0.0410005403640697	0.0727495968324841	RAB3 GTPase activating non-catalytic protein subunit 2	RAB3GAP2	124234	chr1
ENSG00000116141	1948.76754084023	-0.552000073652227	0.0540566209089691	-10.2115164501642	1.76090932237024e-24	2.41779755488189e-23	microtubule affinity regulating kinase 1	MARK1	54673	chr1
ENSG00000162817	71.7944284773532	-0.420639647891261	0.196021884788302	-2.14588104968759	0.0318824700768935	0.0583907406076754	chromosome 1 open reading frame 115	C1orf115	8872	chr1
ENSG00000117791	439.654104326729	-0.35651421687283	0.0913342434593179	-3.90340143378566	9.48501879843629e-05	0.000292594027031058	mitochondrial amidoxime reducing component 2	MARC2	35921	chr1
ENSG00000186205	890.334424440896	-0.570648167906577	0.0719901086060377	-7.92675798045285	2.24941067552533e-15	1.95428018056652e-14	mitochondrial amidoxime reducing component 1	MARC1	27703	chr1
ENSG00000143507	130.972756897525	-0.518155862456828	0.161320760380331	-3.21196020422429	0.00131832635654122	0.00332729512044688	dual specificity phosphatase 10	DUSP10	40753	chr1
ENSG00000143498	421.311641391909	0.148941077846371	0.0930312848086207	1.60097840369254	0.109381702527201	0.170053079236168	TATA-box binding protein associated factor, RNA polymerase I subunit A	TAF1A	32032	chr1
ENSG00000154305	3214.70657253285	-0.151281122749227	0.0620377569380144	-2.43853308397951	0.0147470087320626	0.0294792830848611	MIA family member 3, ER export factor	MIA3	26905	chr1
ENSG00000186063	1439.15976322304	1.12519181806803	0.0623874772496337	18.0355396254565	1.02490028658075e-72	3.92178374687526e-71	axin interactor, dorsalization associated	AIDA	44725	chr1
ENSG00000162819	4365.47321441089	-0.106346616274375	0.0483707181126476	-2.19857427021677	0.0279082081664528	0.0519063021741263	BRO1 domain and CAAX motif containing	BROX	19389	chr1
ENSG00000228106	66.2520440777367	-0.320366449977552	0.200024837995252	-1.6016333430809	0.109236713057105	0.169890079551889	dispatched RND transporter family member 1	DISP1	190907	chr1
ENSG00000154309	220.770909298817	-0.185089895214933	0.127797900624349	-1.44830153164244	0.147532739512027	0.218714514328987	dispatched RND transporter family member 1	DISP1	190907	chr1
ENSG00000187554	56.9795991927808	-0.282622669059701	0.233973245276427	-1.20792729410492	0.227075229844369	0.313937669691055	toll like receptor 5	TLR5	25459	chr1
ENSG00000143502	594.951014212743	-0.417623067161527	0.082132086727101	-5.08477361045454	3.68064823402826e-07	1.57734022391572e-06	sushi domain containing 4	SUSD4	143241	chr1
ENSG00000162909	7849.45789206118	0.44046862643414	0.0414281786301637	10.6321021343052	2.11295310290317e-26	3.14807534108073e-25	calpain 2	CAPN2	74426	chr1
ENSG00000143514	4005.37291181585	0.0278443050397978	0.0493531656626998	0.564184782595253	0.572628383060589	0.660883651861245	tumor protein p53 binding protein 2	TP53BP2	66080	chr1
ENSG00000143756	2412.40401480119	0.0287677525650422	0.047063324184619	0.611256282114555	0.541029928415822	0.633485841272769	F-box protein 28	FBXO28	47961	chr1
ENSG00000143753	3607.41237397614	0.0352539357267232	0.0533209228592148	0.661165145618455	0.508506410819447	0.60378400029897	delta 4-desaturase, sphingolipid 1	DEGS1	10233	chr1
ENSG00000143748	1313.65102184335	0.105443784983308	0.0623218247927586	1.69192390200295	0.0906604839862508	0.144807699339452	nuclear VCP-like	NVL	102856	chr1
ENSG00000143771	1322.91710504121	-0.111583459214231	0.0591729113108468	-1.88571859559286	0.0593328856622289	0.0999587469865892	cornichon family AMPA receptor auxiliary protein 4	CNIH4	21711	chr1
ENSG00000162923	3630.12350299886	-0.192232156306792	0.0541950679277078	-3.5470415234688	0.000389583183025665	0.0010866585298296	WD repeat domain 26	WDR26	5003	chr1
ENSG00000143786	485.465868961586	-0.0523509784388047	0.0889392590572339	-0.588614960296847	0.556119595894063	0.646398451364956	cornichon family AMPA receptor auxiliary protein 3	CNIH3	124071	chr1
ENSG00000185842	406.857902609928	-0.0891148263238809	0.0949966395945106	-0.938083985962703	0.34820125084947	0.445673416025117	dynein axonemal heavy chain 14	DNAH14	94636	chr1
ENSG00000143815	4001.14773136468	0.00998231874638322	0.0496508957347375	0.201050124044373	0.840659380841327	0.881311073335039	lamin B receptor	LBR	26612	chr1
ENSG00000154380	20867.6649084254	0.00241411475540139	0.0394079451320841	0.0612595949195011	0.951152468919144	0.965561780748957	enabled homolog (Drosophila)	ENAH	80583	chr1
ENSG00000143742	11777.3674859013	-0.0334188068840945	0.043376378781105	-0.770437916284793	0.441040169138481	0.53912608612939	signal recognition particle 9	SRP9	12654	chr1
ENSG00000143819	1575.64678760374	-0.21291981857724	0.0747014831242971	-2.85027565280008	0.00436813540305663	0.00989898645951588	epoxide hydrolase 1	EPHX1	35466	chr1
ENSG00000196187	948.86512509649	0.92446471644383	0.0771006734194537	11.9903585201446	3.99173711576406e-33	7.37523460504956e-32	transmembrane protein 63A	TMEM63A	37188	chr1
ENSG00000143811	1123.47465033816	-0.0456593261103729	0.065310927397623	-0.699106993725442	0.484485168158878	0.580528300826924	pyrroline-5-carboxylate reductase family member 2	PYCR2	4464	chr1
ENSG00000143751	2665.46641834617	0.0618370743892526	0.0508809525667258	1.21532855164531	0.224240806452033	0.310587351793392	SDE2 telomere maintenance homolog	SDE2	16664	chr1
ENSG00000163041	1405.62094377196	-0.208538313915363	0.0624792127352012	-3.33772313680052	0.00084467869223744	0.0022111635672496	H3 histone family member 3A	H3F3A	9296	chr1
ENSG00000182827	2876.40241914352	0.207244449523305	0.0473538075005301	4.37651079104854	1.20594223712655e-05	4.23288747643042e-05	acyl-CoA binding domain containing 3	ACBD3	42044	chr1
ENSG00000183814	712.816538419495	-0.493746105229044	0.0754561836825774	-6.54348101284969	6.01031186991432e-11	3.6693294567633e-10	lin-9 DREAM MuvB core complex component	LIN9	78600	chr1
ENSG00000143799	14902.0894778577	-0.270220135298417	0.0346241796988496	-7.80437652671367	5.97964172508077e-15	5.05095792278385e-14	poly(ADP-ribose) polymerase 1	PARP1	47410	chr1
ENSG00000203685	165.339237201204	-0.165023112159222	0.137784919780256	-1.19768631010132	0.2310391608341	0.31862937424934	stum, mechanosensory transduction mediator homolog	STUM	60415	chr1
ENSG00000143772	5587.24813178745	-0.299434021875261	0.0490350499226673	-6.10653037668964	1.01820264888473e-09	5.6597432884855e-09	inositol-trisphosphate 3-kinase B	ITPKB	107486	chr1
ENSG00000143801	885.35663276563	-0.0590923309604141	0.0780951812753511	-0.756670642098441	0.449247207523099	0.546439737828817	presenilin 2	PSEN2	25532	chr1
ENSG00000163050	216.245364210166	0.263933148511039	0.12533523689142	2.10581760610297	0.0352201988912827	0.0636775938188009	coenzyme Q8A	COQ8A	4652	chr1
ENSG00000143776	4918.22817280771	-0.141400762168654	0.0445280627565811	-3.17554264468323	0.00149556537634087	0.00373757906774695	CDC42 binding protein kinase alpha	CDC42BPA	30731	chr1
ENSG00000181450	3365.65952908016	-0.415956236946374	0.0498974555969842	-8.33622139585639	7.67022431589467e-17	7.23864498275639e-16	zinc finger protein 678	ZNF678	98945	chr1
ENSG00000143740	1682.04500694819	-0.00243789497522956	0.0569350999512063	-0.0428188407031664	0.965845945053327	0.97618614317111	synaptosome associated protein 47	SNAP47	41975	chr1
ENSG00000081692	1372.32798816125	0.156741880089153	0.0721189695167601	2.17337936384028	0.0297517766823365	0.0549266586390881	jumonji domain containing 4	JMJD4	4223	chr1
ENSG00000143816	26.5864045902683	-0.387034068755061	0.268901571437173	-1.43931501287447	0.150061291173476	0.22185246309348	Wnt family member 9A	WNT9A	26512	chr1
ENSG00000143793	372.429826394354	0.0437494112400761	0.0997880924632579	0.438423164128372	0.661079557668393	0.736467555323811	chromosome 1 open reading frame 35	C1orf35	2595	chr1
ENSG00000162910	603.155762155106	0.274998383888895	0.0870240579258444	3.16002712862722	0.0015775444948466	0.0039159005051979	mitochondrial ribosomal protein L55	MRPL55	2634	chr1
ENSG00000143774	4382.15587553599	0.256159635976139	0.0670207055939692	3.82209697295681	0.000132321631261861	0.000399992325884386	guanylate kinase 1	GUK1	8727	chr1
ENSG00000198835	38.5399147148918	0.338694059152688	0.243441756147441	1.39127347958974	0.164142512668954	0.239214404488154	gap junction protein gamma 2	GJC2	10113	chr1
ENSG00000181873	426.361411085358	0.0760920091186834	0.0940849027223185	0.80875897106745	0.418653800410632	0.517086733816994	IBA57 homolog, iron-sulfur cluster assembly	IBA57	7708	chr1
ENSG00000154358	157.150117609124	-0.305593845538446	0.146364594262751	-2.08789459689854	0.0368073436840106	0.0661983881205303	obscurin, cytoskeletal calmodulin and titin-interacting RhoGEF	OBSCN	7487	chr1
ENSG00000154370	522.098023615718	0.139371525447925	0.091932523769961	1.51601979073987	0.129514348195144	0.196261463587209	tripartite motif containing 11	TRIM11	13141	chr1
ENSG00000162931	11.1186735409181	-0.256940124428441	0.329220167881808	-0.780450742375795	0.435125610317294	0.533105955077745	tripartite motif containing 17	TRIM17	8948	chr1
ENSG00000181218	484.621253179612	0.723405202161775	0.114724907538258	6.30556361024337	2.8714703916151e-10	1.66936250869944e-09	histone cluster 3 H2A	HIST3H2A	496	chr1
ENSG00000196890	596.969549518627	1.23648483803805	0.104265351752357	11.8590194849662	1.9322458407393e-32	3.50987068736108e-31	histone cluster 3 H2B family member b	HIST3H2BB	452	chr1
ENSG00000168159	3646.06340641548	-0.0598926451561947	0.0521279346062497	-1.14895488587062	0.250574583785095	0.340165748491034	ring finger protein 187	RNF187	8822	chr1
ENSG00000116574	508.322372850632	0.679317429875142	0.0922433065993505	7.36440891939931	1.7793348905816e-13	1.3368876149461e-12	ras homolog family member U	RHOU	11593	chr1
ENSG00000168118	1343.79064451008	0.0948986304558497	0.0626774657310218	1.51407893329804	0.130005821045998	0.19692099543037	RAB4A, member RAS oncogene family	RAB4A	34832	chr1
ENSG00000154429	2795.98985471571	0.209160705192403	0.0544696441497975	3.83994991076475	0.00012305941534615	0.000374410577651109	centriole, cilia and spindle associated protein	CCSAP	21937	chr1
ENSG00000069248	5791.56522318153	-0.170921803100467	0.0418871613629018	-4.08052963101594	4.49332006339533e-05	0.000145198309847373	nucleoporin 133	NUP133	67045	chr1
ENSG00000135776	862.003510553209	-0.262577963800988	0.0727432081843339	-3.6096560813706	0.000306603243405951	0.000869754592647426	ATP binding cassette subfamily B member 10	ABCB10	42114	chr1
ENSG00000135801	858.666529060428	-0.0388635607428824	0.0702904726884895	-0.552899408076489	0.580332292790405	0.667670562764284	TATA-box binding protein associated factor 5 like	TAF5L	32929	chr1
ENSG00000135763	1595.13142217089	-0.105377957193145	0.0587105929939209	-1.79487127994186	0.0726742107374581	0.119600742817638	URB2 ribosome biogenesis 2 homolog (S. cerevisiae)	URB2	33966	chr1
ENSG00000143641	5910.09919131766	0.489406830809227	0.0425560236090079	11.5002951240405	1.31465146229937e-30	2.22901861131993e-29	polypeptide N-acetylgalactosaminyltransferase 2	GALNT2	224340	chr1
ENSG00000177614	469.904133760518	-0.883233073835665	0.102949858093487	-8.57925489351929	9.54896638465994e-18	9.50485246746001e-17	piggyBac transposable element derived 5	PGBD5	104283	chr1
ENSG00000135775	1280.38596607548	-0.115612428294988	0.0633943832192771	-1.82370144520677	0.0681972202581126	0.113168442846361	component of oligomeric golgi complex 2	COG2	15356	chr1
ENSG00000135744	960.493610824322	-1.15380940446387	0.074229981448431	-15.5437113407531	1.75517651375484e-54	5.24120406719328e-53	angiotensinogen	AGT	12065	chr1
ENSG00000119280	2451.84209183121	-0.0271582292619593	0.0481142402526849	-0.564453041746695	0.572445849468145	0.660769714026717	chromosome 1 open reading frame 198	C1orf198	32198	chr1
ENSG00000143643	812.907672242954	0.0258821154296025	0.0763589981151567	0.338953051617699	0.734645098071167	0.797697673940665	tetratricopeptide repeat domain 13	TTC13	72632	chr1
ENSG00000173409	396.106196258804	-0.00129467247969005	0.0990986047840071	-0.0130644874618758	0.989576343679933	0.992695128804346	ARV1 homolog, fatty acid homeostasis modulator	ARV1	21657	chr1
ENSG00000143633	642.630711537681	0.337078595876936	0.0904547342588792	3.72648926160377	0.000194165340339716	0.000571879199044736	chromosome 1 open reading frame 131	C1orf131	4483	chr1
ENSG00000116906	4539.14790130664	-0.120149048108078	0.0439335247028633	-2.73479191393553	0.00624197214658919	0.013601807983971	glyceronephosphate O-acyltransferase	GNPAT	36801	chr1
ENSG00000116903	1572.78646865382	0.337116347625045	0.0553799519366654	6.08733550384051	1.14805230526116e-09	6.3526165686221e-09	exocyst complex component 8	EXOC8	5097	chr1
ENSG00000010072	1354.51231503005	0.597652456078881	0.0656284504031043	9.10660624177424	8.49992226939269e-20	9.44773106213053e-19	SprT-like N-terminal domain	SPRTN	17088	chr1
ENSG00000135766	3404.63093331667	-0.0346048106752869	0.0593664635752143	-0.582901668573273	0.559959497312664	0.649514059952282	egl-9 family hypoxia inducible factor 1	EGLN1	61294	chr1
ENSG00000116918	1312.82926004877	0.108407006693212	0.060767948946177	1.78395039775375	0.0744317255419048	0.122048509098979	translin associated factor X	TSNAX	37871	chr1
ENSG00000162946	1645.28661179842	0.508336552646627	0.0637602764456296	7.9726215283916	1.55343351433688e-15	1.36059014185666e-14	disrupted in schizophrenia 1	DISC1	97260	chr1
ENSG00000116991	10297.1191086206	-0.239291885932627	0.0376422769838949	-6.35699817083347	2.05734441847803e-10	1.2096183283285e-09	signal induced proliferation associated 1 like 2	SIPA1L2	117532	chr1
ENSG00000212916	321.756488920764	0.539788406990554	0.116246487963158	4.643481419943	3.42586814335779e-06	1.30201583033177e-05	microtubule associated protein 10	MAP10	5455	chr1
ENSG00000135778	1630.1166252862	-0.180775415757161	0.0553256749776645	-3.2674778180319	0.00108510369416705	0.00278155825111689	nucleoside-triphosphatase, cancer-related	NTPCR	27850	chr1
ENSG00000135749	417.267050165593	0.290278111935907	0.0991007599313002	2.92912094858947	0.00339922125677802	0.00788572034142391	pecanex homolog 2 (Drosophila)	PCNX2	216129	chr1
ENSG00000183780	14.313921750492	0.0784150276305933	0.311464819068709	0.251762070159503	0.801224976735124	0.850151965995561	solute carrier family 35 member F3	SLC35F3	110246	chr1
ENSG00000168275	684.378378046678	0.530396672302193	0.078773072270907	6.73322313084497	1.65945277104089e-11	1.06804393650862e-10	cytochrome c oxidase assembly factor 6	COA6	10367	chr1
ENSG00000059588	882.198299239358	0.548613543920339	0.0693671950774511	7.90883274590808	2.59813391165045e-15	2.24471717659867e-14	TAR (HIV-1) RNA binding protein 1	TARBP1	87791	chr1
ENSG00000231768	89.7458486582934	2.46113080297723	0.203442181654345	12.0974459817717	1.08948234833178e-33	2.05083337209497e-32	long intergenic non-protein coding RNA 1354	LINC01354	3889	chr1
ENSG00000168264	3784.59031317343	0.700404964261334	0.0430784252397013	16.2588339839275	1.93383241562723e-59	6.35758755419233e-58	interferon regulatory factor 2 binding protein 2	IRF2BP2	5257	chr1
ENSG00000173726	7847.64966238938	-0.188950498607459	0.0378334989778747	-4.99426444056784	5.90604279371705e-07	2.46834166893487e-06	translocase of outer mitochondrial membrane 20	TOMM20	19599	chr1
ENSG00000207181	33.4851176975929	-0.256597359048459	0.266704219403785	-0.962104610201068	0.335997058543793	0.432901453993176	small nucleolar RNA, H/ACA box 14B	SNORA14B	135	chr1
ENSG00000188739	33.5960630208921	0.110554821087375	0.249923617345279	0.442354437174455	0.658232744209526	0.734253252302224	RNA binding motif protein 34	RBM34	30275	chr1
ENSG00000054267	2637.64702026575	0.193428480594616	0.072743619737596	2.65904393117032	0.00783627443024795	0.0167118963599243	AT-rich interaction domain 4B	ARID4B	99907	chr1
ENSG00000152904	2375.00985004478	0.644337647979557	0.0517386157107738	12.4537086879459	1.3349468751211e-35	2.6556720150669e-34	geranylgeranyl diphosphate synthase 1	GGPS1	17180	chr1
ENSG00000116957	1063.28901753283	0.0677031739661174	0.0687074753278811	0.985382938945566	0.324436006819666	0.420976701603278	tubulin folding cofactor E	TBCE	81553	chr1
ENSG00000162885	705.734726189673	0.4067624677186	0.0753313888638981	5.39964115693529	6.67743264862526e-08	3.09865620424111e-07	beta-1,3-N-acetylgalactosaminyltransferase 2	B3GALNT2	57277	chr1
ENSG00000168243	1201.72199693481	-0.469000756205859	0.0610626903166128	-7.68064351200493	1.58291405527216e-14	1.30098071268114e-13	G protein subunit gamma 4	GNG4	103070	chr1
ENSG00000143669	1141.59598769492	0.376760476601356	0.0766747807067413	4.91374703818659	8.93520214982889e-07	3.65364981338259e-06	lysosomal trafficking regulator	LYST	92127	chr1
ENSG00000116962	973.643047927762	-0.04789329555744	0.0952763553473109	-0.502677662079481	0.615190917321781	0.698196823103042	nidogen 1	NID1	89350	chr1
ENSG00000077585	3956.70233386664	-0.538782950183527	0.0540112822151965	-9.97537788562139	1.95356384792245e-23	2.5738157751791e-22	G protein-coupled receptor 137B	GPR137B	66378	chr1
ENSG00000086619	425.023094046278	0.0736120951496157	0.0997172041320369	0.738208574842761	0.460387712949016	0.557087430434678	endoplasmic reticulum oxidoreductase 1 beta	ERO1B	66918	chr1
ENSG00000116977	2241.40750214475	1.77617575551049	0.0518231027124462	34.2738211829202	1.92694721108564e-257	2.36727155186441e-255	galectin 8	LGALS8	27012	chr1
ENSG00000223776	14.5770082177594	0.935209803043616	0.321535124479355	2.90857742076531	0.0036307726418206	0.00835919297200355	LGALS8 antisense RNA 1	LGALS8-AS1	1440	chr1
ENSG00000119285	2841.242770453	-0.236276578779179	0.0617956881709883	-3.82351238043346	0.000131563982424806	0.000397787904546503	HEAT repeat containing 1	HEATR1	55537	chr1
ENSG00000077522	797.984710417465	-0.0080070739978014	0.0697485808972391	-0.114799095476914	0.908604366022278	0.933191855833236	actinin alpha 2	ACTN2	77789	chr1
ENSG00000116984	2963.57715004681	-0.11941320610419	0.0558013589294172	-2.13996949886534	0.0323572317772675	0.0591365041159639	5-methyltetrahydrofolate-homocysteine methyltransferase	MTR	108701	chr1
ENSG00000198626	77.0836524146739	4.35241475103629	0.282813264227708	15.389712229098	1.91883751916782e-53	5.62203335898438e-52	ryanodine receptor 2	RYR2	61049	chr1
ENSG00000133019	1011.58017720678	0.688431513397726	0.0732144351327168	9.40294782237678	5.30553976416247e-21	6.26509986484784e-20	cholinergic receptor muscarinic 3	CHRM3	500032	chr1
ENSG00000155816	844.270251080404	-0.0326672530203185	0.0847565561867793	-0.38542449681803	0.699922936023781	0.769317351918544	formin 2	FMN2	383305	chr1
ENSG00000182901	211.917758075853	-0.253408797391414	0.124565125684683	-2.03434786420783	0.0419165344641256	0.0740932809756505	regulator of G-protein signaling 7	RGS7	581662	chr1
ENSG00000091483	2771.64692561651	-0.405045873074116	0.0530771679198875	-7.63126385502474	2.32463341900776e-14	1.88952356547903e-13	fumarate hydratase	FH	22229	chr1
ENSG00000117009	86.5432863064019	3.69046098638283	0.245228117318331	15.0490939894638	3.49994714479848e-51	9.8824112425207e-50	kynurenine 3-monooxygenase	KMO	63516	chr1
ENSG00000054277	194.087010915196	0.441138194653029	0.134833037598341	3.27173667901149	0.00106889079421337	0.00274625125168926	opsin 3	OPN3	47250	chr1
ENSG00000203668	2893.1610505402	-0.150207396164585	0.0507875742098449	-2.95756193323895	0.00310082450293352	0.00725476898823655	CHM like, Rab escort protein 2	CHML	7066	chr1
ENSG00000174371	1012.49884391669	-0.75049237148412	0.0712075084821968	-10.5395117380319	5.67929861158968e-26	8.3112410716106e-25	exonuclease 1	EXO1	41209	chr1
ENSG00000197769	180.157764424506	0.287497824668483	0.153900830852101	1.86807194656908	0.0617520432092943	0.103655893699976	microtubule associated protein 1 light chain 3 gamma	MAP1LC3C	3594	chr1
ENSG00000180287	1199.79100653378	-0.137107102986723	0.0634304526226748	-2.16153436271888	0.030654085515913	0.0563991681096113	phospholipase D family member 5	PLD5	436310	chr1
ENSG00000143702	5585.06263727366	0.0403522520504794	0.0619796847922931	0.651056103071648	0.515010271631172	0.609748825276403	centrosomal protein 170 pseudogene 1	CEP170P1	37865	chr4
ENSG00000054282	1253.40111681944	0.227878118289549	0.0582178913044342	3.91422830995242	9.06937918230665e-05	0.000280761837860753	serologically defined colon cancer antigen 8	SDCCAG8	244087	chr1
ENSG00000117020	3013.34271102808	-0.108091110568526	0.0479535896916995	-2.25407756256538	0.0241912889368962	0.0457960261639946	AKT serine/threonine kinase 3	AKT3	343564	chr1
ENSG00000179456	3418.45013443569	0.105967864967365	0.0467632126721651	2.2660518581188	0.0234482083238274	0.0445469265775007	zinc finger and BTB domain containing 18	ZBTB18	8540	chr1
ENSG00000035687	1245.46285244405	0.220826239624877	0.0602892051140301	3.66278240370245	0.000249490461012724	0.000721179340863405	adenylosuccinate synthase	ADSS	43643	chr1
ENSG00000121644	5120.37118438169	-0.316170942618583	0.0428994861563762	-7.3700403185736	1.70576440816653e-13	1.28436723313829e-12	desumoylating isopeptidase 2	DESI2	55983	chr1
ENSG00000203667	2620.37834042289	-0.0728348689648924	0.0496143390866114	-1.46802054216111	0.14209864306195	0.211892195068421	COX20, cytochrome c oxidase assembly factor	COX20	9721	chr1
ENSG00000153187	20920.5718163106	-0.112005339054905	0.0630995077404165	-1.77505884064391	0.0758881721321739	0.124102504753748	heterogeneous nuclear ribonucleoprotein U	HNRNPU	14226	chr1
ENSG00000203666	590.721272629541	0.0164342219936059	0.0821455687648385	0.200062185224536	0.841431947268801	0.881856949898942	EF-hand calcium binding domain 2	EFCAB2	117978	chr1
ENSG00000162849	4675.25737892501	-0.150795185478683	0.119784721046688	-1.25888497431913	0.208071881807568	0.292241600341594	kinesin family member 26B	KIF26B	548142	chr1
ENSG00000185420	478.207810432676	0.0539815121288407	0.0888724372587269	0.607404430371238	0.54358254902702	0.635711509224752	SET and MYND domain containing 3	SMYD3	668073	chr1
ENSG00000162851	297.993200061461	0.249402243219728	0.112214237808689	2.22255435753997	0.0262458648151198	0.049213739797895	transcription factor B2, mitochondrial	TFB2M	25703	chr1
ENSG00000162852	1028.11103987817	0.19399375895233	0.074833471776092	2.59233942176003	0.00953256709073713	0.0199229371893409	consortin, connexin sorting protein	CNST	81906	chr1
ENSG00000143653	3659.97056111149	-0.0795559445175383	0.048371485472692	-1.6446868178661	0.100034412644316	0.157378336225976	saccharopine dehydrogenase (putative)	SCCPDH	44063	chr1
ENSG00000153207	2830.05792355515	-0.30490948680939	0.0452497583945787	-6.73836717868357	1.60176381833529e-11	1.03233788659851e-10	AT-hook containing transcription factor 1	AHCTF1	27467	chr1
ENSG00000197472	181.149123292355	-0.666598874572625	0.131632179152188	-5.0641027054785	4.10328399919078e-07	1.74617114581182e-06	zinc finger protein 695	ZNF695	19969	chr1
ENSG00000277462	280.822663111814	-0.25215219539183	0.118702690024344	-2.12423320263523	0.0336506481304835	0.0611810109135949	zinc finger protein 670	ZNF670	44176	chr1
ENSG00000188295	615.338862758223	-0.0256907131510227	0.0808906478873547	-0.317598063830551	0.750789842997789	0.811015175563751	zinc finger protein 669	ZNF669	4411	chr1
ENSG00000196418	829.074974881284	0.0407984616837684	0.073046594697991	0.558526538471073	0.57648488779333	0.664062415984997	zinc finger protein 124	ZNF124	50042	chr1
ENSG00000162714	1517.79828394654	0.04927898420008	0.0565499812467977	0.871423528595257	0.38352294347859	0.48120756346691	zinc finger protein 496	ZNF496	19310	chr1
ENSG00000175137	1434.64292558369	0.259458195744	0.0636151635386989	4.07855896788136	4.53157091792148e-05	0.00014633306595686	SH3 binding domain protein 5 like	SH3BP5L	15184	chr1
ENSG00000171161	1786.36410854789	-0.0311595996872929	0.0541232818807714	-0.575715267154986	0.564807654229049	0.653675828235504	zinc finger protein 672	ZNF672	11185	chr1
ENSG00000171163	531.708760159952	-0.378792339912601	0.0832462397357282	-4.5502636649428	5.35787354055586e-06	1.97898264584677e-05	zinc finger protein 692	ZNF692	8062	chr1
ENSG00000185220	171.685737872233	-0.0692135087373435	0.134885778841096	-0.513126805005006	0.607862622267584	0.69206698844464	piggyBac transposable element derived 2	PGBD2	12904	chr1
ENSG00000184731	885.337458726102	-0.834393565064718	0.072294044843604	-11.541663865534	8.13364929897584e-31	1.38916778575801e-29	family with sequence similarity 110 member C	FAM110C	7775	chr2
ENSG00000035115	762.634590183919	-0.0388642833830501	0.0768757171744935	-0.505546937465774	0.613174739996403	0.696509649841196	SH3 and SYLF domain containing 1	SH3YL1	38555	chr2
ENSG00000143727	2757.34133705219	0.0643132586130911	0.0608545851641495	1.0568350509598	0.290586874464569	0.384656822010992	acid phosphatase 1, soluble	ACP1	8281	chr2
ENSG00000189292	41.0472111721186	0.338037592749222	0.230990752478046	1.46342478702194	0.143351180287855	0.213464463575908	family with sequence similarity 150 member B	FAM150B	7964	chr2
ENSG00000151353	879.787053438772	0.0794213922946523	0.067838710253225	1.17073853553807	0.241703890534119	0.330540277993393	transmembrane protein 18	TMEM18	8186	chr2
ENSG00000172554	19.25058864483	0.392695004620551	0.293543760581958	1.33777329772577	0.180970348841126	0.259468646142502	syntrophin gamma 2	SNTG2	424831	chr2
ENSG00000130508	2244.50144720867	0.353528550700854	0.059368399877294	5.954827002775	2.60347077221588e-09	1.39272758460212e-08	peroxidasin	PXDN	79562	chr2
ENSG00000032389	1433.79956856861	0.171063040089041	0.0694568948985248	2.46286621852245	0.0137831333518089	0.0277705053362226	tumor suppressing subtransferable candidate 1	TSSC1	130705	chr2
ENSG00000171853	961.59411385111	0.114005408365166	0.0685289630552118	1.66360912645527	0.0961905668796558	0.152274101850892	trafficking protein particle complex 12	TRAPPC12	99897	chr2
ENSG00000182551	1339.24317159855	-0.453864704973612	0.0589220237853769	-7.70280237873043	1.33114143749052e-14	1.09986052106518e-13	acireductone dioxygenase 1	ADI1	21661	chr2
ENSG00000171865	531.198604270156	0.0427120145981874	0.0921519694202194	0.463495407281179	0.643009306092837	0.721767617046396	ribonuclease H1	RNASEH1	13250	chr2
ENSG00000234171	385.781954659688	0.0140233679842007	0.096924383821676	0.14468359179875	0.884960694680059	0.915487851159272	RNASEH1 antisense RNA 1	RNASEH1-AS1	3365	chr2
ENSG00000171863	10238.2218828198	-0.335163717443159	0.0512273099856898	-6.54267650471566	6.04274504346859e-11	3.68752262892277e-10	ribosomal protein S7	RPS7	3129	chr2
ENSG00000176887	6852.88529375923	0.10548150605681	0.118533505603032	0.889887677920089	0.373526200969265	0.471070188615449	SRY-box 11	SOX11	8719	chr2
ENSG00000134326	9585.81093377483	6.26319840632747	0.193434880266546	32.3788470708954	5.44912090879809e-230	5.82556781127612e-228	cytidine/uridine monophosphate kinase 2	CMPK2	15186	chr2
ENSG00000134321	38705.1110881452	6.98475459476979	0.28633190132695	24.3939098731238	1.98462381490809e-131	1.27498424439394e-129	radical S-adenosyl methionine domain containing 2	RSAD2	20568	chr2
ENSG00000228203	34.0465181271782	0.239350029583003	0.243302303669969	0.98375570626603	0.325235642621941	0.421791385769078	RNF144A antisense RNA 1	RNF144A-AS1	6407	chr2
ENSG00000151692	1897.96071988852	-0.372178384747366	0.0512827391612146	-7.25738115464875	3.94656467918161e-13	2.8907760633859e-12	ring finger protein 144A	RNF144A	21945	chr2
ENSG00000115738	6278.4369939348	0.776095870402934	0.0496089791392194	15.6442620644329	3.63559135970691e-55	1.0973374351874e-53	inhibitor of DNA binding 2, HLH protein	ID2	2471	chr2
ENSG00000134313	11724.2368933887	-0.307164085487191	0.0366360779641477	-8.38419674146846	5.10733097189543e-17	4.85595181679535e-16	kinase D-interacting substrate 220kDa	KIDINS220	102971	chr2
ENSG00000143797	5338.59861821235	-0.464778331157186	0.0457520909967108	-10.1586249072332	3.03324160752754e-24	4.12833320830157e-23	membrane bound O-acyltransferase domain containing 2	MBOAT2	147176	chr2
ENSG00000151693	2512.53558316087	-0.0545176588729984	0.0486087036035288	-1.12156167170524	0.262048855894298	0.35268059069764	ArfGAP with SH3 domain, ankyrin repeat and PH domain 2	ASAP2	198919	chr2
ENSG00000119185	1434.4084754548	-0.295496980745161	0.0610201111008331	-4.84261623609411	1.28140629361021e-06	5.14804794664687e-06	integrin subunit beta 1 binding protein 1	ITGB1BP1	17829	chr2
ENSG00000119203	2245.15686156867	-0.0279916442361711	0.051982773583413	-0.538479236612009	0.590246235961699	0.676353995634396	cleavage and polyadenylation specific factor 3	CPSF3	49574	chr2
ENSG00000134330	1272.3849332302	-0.111258519525195	0.0627477634849834	-1.77310733237243	0.0762109232245546	0.124572126489249	isoamyl acetate-hydrolyzing esterase 1 homolog	IAH1	22003	chr2
ENSG00000151694	5850.84479810815	0.29525821616205	0.0447499729969988	6.5979529458454	4.1687352045156e-11	2.58332462563013e-10	ADAM metallopeptidase domain 17	ADAM17	28287	chr2
ENSG00000134308	20308.9009061955	0.000202463372629946	0.0378427003871645	0.00535013015875099	0.995731234112839	0.997155233017541	tyrosine 3-monooxygenase/tryptophan 5-monooxygenase activation protein theta	YWHAQ	47001	chr2
ENSG00000115750	1522.11630916601	0.280985924305125	0.0581965273023473	4.82822493591971	1.37755442949333e-06	5.51849250144569e-06	TATA-box binding protein associated factor, RNA polymerase I subunit B	TAF1B	90975	chr2
ENSG00000134317	204.56439011513	0.364465406386075	0.138498615983033	2.63154547645967	0.00849974908407495	0.017957306671062	grainyhead like transcription factor 1	GRHL1	50621	chr2
ENSG00000172059	381.545288345171	-0.236870081363772	0.110810375927366	-2.13761644053112	0.0325478862922775	0.0594539125503256	Kruppel like factor 11	KLF11	10592	chr2
ENSG00000205795	162.236443150063	-1.34440467215332	0.148218232165721	-9.07044060983103	1.18536696429546e-19	1.30614196183776e-18	cystin 1	CYS1	23613	chr2
ENSG00000171848	2151.20895983639	-0.651341798899632	0.0544061991345357	-11.9718305866027	4.99150279815358e-33	9.19815745896591e-32	ribonucleotide reductase regulatory subunit M2	RRM2	8852	chr2
ENSG00000115756	402.812256881973	0.132136199569375	0.0966324000907303	1.36741092475514	0.171496539950256	0.248300324822013	hippocalcin like 1	HPCAL1	97455	chr2
ENSG00000115758	9922.99642527889	-0.452317878199382	0.0511594410211381	-8.84133737920422	9.45795905031857e-19	9.96679582390607e-18	ornithine decarboxylase 1	ODC1	2490	chr2
ENSG00000206633	70.949424024341	-0.317872502237814	0.19377076219451	-1.64045647876808	0.10091029040397	0.158649373272071	small nucleolar RNA, H/ACA box 80B	SNORA80B	136	chr2
ENSG00000115761	1728.11168899342	-0.0511550651306248	0.0529778754797954	-0.965592988909762	0.334247884971395	0.431072532905211	nucleolar protein 10	NOL10	119222	chr2
ENSG00000143882	123.473695009396	0.120104111649026	0.178156098017845	0.674151000079692	0.500215318295248	0.595859107997358	ATPase H+ transporting V1 subunit C2	ATP6V1C2	63462	chr2
ENSG00000143870	18563.4277639615	0.344050028030699	0.0475890222662929	7.22960909147293	4.84386272194629e-13	3.51858389112333e-12	protein disulfide isomerase family A member 6	PDIA6	54587	chr2
ENSG00000162975	637.043460995222	0.219130080836828	0.0810065690093415	2.70509026016839	0.00682858323067183	0.0147242968661369	potassium voltage-gated channel modifier subfamily F member 1	KCNF1	2289	chr2
ENSG00000145063	20.9001658990751	0.766689162579357	0.295033300315795	2.59865297157547	0.00935903348237528	0.0195982751077551	uncharacterized LOC285150	FLJ33534	32326	chr2
ENSG00000150873	53.4887839416714	1.55708294439915	0.22360883918413	6.96342304749846	3.32102603628247e-12	2.26000824286375e-11	chromosome 2 open reading frame 50	C2orf50	13738	chr2
ENSG00000162976	391.984923715294	0.188676388927281	0.0998831636541333	1.88897089383966	0.0588957288966382	0.0993417660119738	PQ loop repeat containing 3	PQLC3	23459	chr2
ENSG00000134318	5181.92081084897	0.258095253390526	0.0530651699864475	4.86374119703078	1.1518750621554e-06	4.65704683761153e-06	Rho associated coiled-coil containing protein kinase 2	ROCK2	162934	chr2
ENSG00000169016	1501.49283801374	0.328187227201937	0.0568867239514515	5.76913565073672	7.96791486256742e-09	4.05636669030377e-08	E2F transcription factor 6	E2F6	21803	chr2
ENSG00000196208	1172.07055611608	-0.173572487689297	0.0622823102154533	-2.7868665611288	0.00532203888980633	0.0118122273616066	growth regulation by estrogen in breast cancer 1	GREB1	30528	chr2
ENSG00000134324	2236.03750656621	0.776312548220553	0.0521387036827308	14.8893718751523	3.86382356069496e-50	1.06942389263899e-48	lipin 1	LPIN1	40334	chr2
ENSG00000071575	34929.4065450849	-0.246504180651286	0.0397654508643467	-6.19895349589256	5.68398217459299e-10	3.23331317445877e-09	tribbles pseudokinase 2	TRIB2	25861	chr2
ENSG00000225649	1442.38628105478	-0.213729037603363	0.0649896133085541	-3.28866455303606	0.00100663920757876	0.00259774868290778	uncharacterized LOC100506474	LOC100506474	40231	chr2
ENSG00000162981	869.685296168697	0.100101629087015	0.0771031682587804	1.29828165751951	0.194190567034316	0.275350702775701	family with sequence similarity 84 member A	FAM84A	7359	chr2
ENSG00000151779	7490.2526005512	-0.388478791895464	0.0400938060781316	-9.68924704076304	3.34989137681863e-22	4.20092407338089e-21	neuroblastoma amplified sequence	NBAS	394441	chr2
ENSG00000079785	3874.6946037519	0.0339084721592477	0.0440403926239504	0.76994027843447	0.441335319706031	0.539345650303924	DEAD/H-box helicase 1	DDX1	39491	chr2
ENSG00000134323	154.302788556875	0.207783905491702	0.148627388353023	1.39801895057302	0.1621073765193	0.236762311831557	v-myc avian myelocytomatosis viral oncogene neuroblastoma derived homolog	MYCN	6447	chr2
ENSG00000197872	434.975205039764	-0.69156611686742	0.0985042232525613	-7.0206747896917	2.20799246507239e-12	1.52781296805034e-11	family with sequence similarity 49 member A	FAM49A	116405	chr2
ENSG00000163029	1956.87054279157	0.0106879831730588	0.0530590817399569	0.201435509672798	0.840358051515916	0.881127087780221	structural maintenance of chromosomes 6	SMC6	29672	chr2
ENSG00000178295	1179.0470830017	-0.281854018484069	0.0654155741022137	-4.3086684226552	1.64240381192481e-05	5.66687986844223e-05	GEN1, Holliday junction 5' flap endonuclease	GEN1	31219	chr2
ENSG00000170745	37.0962586551291	0.893683771921312	0.250758065321172	3.56392832580151	0.000365345753626796	0.00102374295308989	potassium voltage-gated channel modifier subfamily S member 3	KCNS3	55112	chr2
ENSG00000240857	443.371744589864	0.693943332214333	0.0942790864799544	7.36052244589662	1.83191826896942e-13	1.37344835957798e-12	retinol dehydrogenase 14 (all-trans/9-cis/11-cis)	RDH14	5971	chr2
ENSG00000143867	23.2936785647522	0.205153730562633	0.276364138552065	0.742331228781999	0.457886675364739	0.554780075134802	odd-skipped related transciption factor 1	OSR1	7127	chr2
ENSG00000183891	202.041079987844	-0.141000016379173	0.132328233391658	-1.06553237177926	0.286635084481115	0.380324429953389	tetratricopeptide repeat domain 32	TTC32	5231	chr2
ENSG00000118965	1880.73924379335	-0.500762191765891	0.066683927575287	-7.50948856754911	5.93588020934306e-14	4.67822185322732e-13	WD repeat domain 35	WDR35	65396	chr2
ENSG00000068697	3228.36996410691	0.64013986754967	0.0537440217569414	11.9109036991075	1.03845628827864e-32	1.90860634085857e-31	lysosomal protein transmembrane 4 alpha	LAPTM4A	15243	chr2
ENSG00000115884	574.447945691895	-1.23390913324551	0.112801950317304	-10.9387216247114	7.52535073578172e-28	1.18418580960251e-26	syndecan 1	SDC1	23681	chr2
ENSG00000055917	3268.82589152739	-0.424036512289232	0.0474625323301112	-8.93413165020305	4.10388462265229e-19	4.41096731697968e-18	pumilio RNA binding family member 2	PUM2	78687	chr2
ENSG00000143878	2499.51622003831	0.103212206380712	0.0662077384950397	1.5589145427229	0.119016607828703	0.182686057939609	ras homolog family member B	RHOB	2367	chr2
ENSG00000118960	1822.93840506368	-0.153884882856722	0.0582430468470084	-2.64211594666301	0.00823898455224536	0.017488175000636	HCLS1 binding protein 3	HS1BP3	14382	chr2
ENSG00000143869	109.138528746158	-1.18152126848917	0.167701937407697	-7.04536445286734	1.84976702288088e-12	1.28885508236053e-11	growth differentiation factor 7	GDF7	4827	chr2
ENSG00000118961	2077.50219967917	-0.163364801364575	0.0577225985331989	-2.83017060069839	0.00465231896367586	0.0104819380769434	lipid droplet associated hydrolase	LDAH	137521	chr2
ENSG00000119771	125.389053930539	0.10049124715525	0.154166712071165	0.651834924707105	0.514507668900775	0.609256777116374	kelch like family member 29	KLHL29	111690	chr2
ENSG00000119778	2283.78839324491	0.0421625892468276	0.0572939267998227	0.735899799539627	0.461791679274505	0.558641484688559	ATPase family, AAA domain containing 2B	ATAD2B	178403	chr2
ENSG00000173960	3215.34107325452	-0.07481541868217	0.0450885623876426	-1.65929927059893	0.0970555021926532	0.153484903817537	UBX domain protein 2A	UBXN2A	60318	chr2
ENSG00000205639	18.215917018008	-0.145829306868796	0.299206548092783	-0.487386749382153	0.625984281969307	0.707865148888183	major facilitator superfamily domain containing 2B	MFSD2B	5821	chr2
ENSG00000163026	1641.76721235452	-0.0867699598927554	0.0558335463359273	-1.55408290511759	0.120164642330567	0.184165661615188	WD repeat and coiled coil containing	WDCP	18091	chr2
ENSG00000119782	209.702911821644	1.55400394088748	0.13432789331075	11.5687360427257	5.93505479037664e-31	1.02239166468911e-29	FK506 binding protein 1B	FKBP1B	13967	chr2
ENSG00000115128	2355.63469092826	0.114974524734824	0.0520765835329562	2.20779699693748	0.0272584275121912	0.0508598824018436	splicing factor 3b subunit 6	SF3B6	8861	chr2
ENSG00000219626	127.065455315329	-0.104867338772501	0.16939107063526	-0.619084219606271	0.535860878484705	0.628591052293488	family with sequence similarity 228 member B	FAM228B	50320	chr2
ENSG00000115129	2571.43565639236	-0.00515747316261529	0.0557217514055743	-0.0925576284398581	0.926255006793348	0.947083402945232	tumor protein p53 inducible protein 3	TP53I3	7783	chr2
ENSG00000176732	18.6235128820895	-0.425920945955507	0.294859054390263	-1.44448996771107	0.148601199728119	0.219995750760286	profilin family member 4	PFN4	7908	chr2
ENSG00000198399	1009.7831195071	-0.120734066071347	0.0652710350595014	-1.84973420386677	0.0643518681409381	0.107483352810237	intersectin 2	ITSN2	157663	chr2
ENSG00000084676	3193.19957787072	0.112325639271075	0.0504676373433003	2.22569641029544	0.0260345233764735	0.0488561570263314	nuclear receptor coactivator 1	NCOA1	186226	chr2
ENSG00000184924	487.261681605669	0.128132614633052	0.0918200568200235	1.39547522698886	0.162872580127748	0.237731160467859	peptidyl-tRNA hydrolase domain containing 1	PTRHD1	3116	chr2
ENSG00000138092	1605.01482225703	-0.331179002483912	0.0598864784536176	-5.53011315802134	3.20024282335145e-08	1.53491098428209e-07	centromere protein O	CENPO	29071	chr2
ENSG00000138031	851.129692188215	-0.224966998333076	0.0710941536243108	-3.16435300041532	0.0015542815526489	0.00386706575676813	adenylate cyclase 3	ADCY3	22498	chr2
ENSG00000115137	502.456106483528	0.0858478586936425	0.0950570875916704	0.903118966387996	0.366462758917069	0.463923967546594	DnaJ heat shock protein family (Hsp40) member C27	DNAJC27	28459	chr2
ENSG00000224165	120.303123881568	0.0772178078942846	0.156399570168247	0.493721356211001	0.621502980607004	0.703536149644447	DNAJC27 antisense RNA 1	DNAJC27-AS1	67583	chr2
ENSG00000084710	3384.58697358458	0.0222358466243617	0.0479273293035501	0.463949211180324	0.64268413398163	0.721614970327393	EFR3 homolog B	EFR3B	105785	chr2
ENSG00000115138	27.7203634683359	1.51983035425018	0.273086136962048	5.56538816344746	2.61569497152103e-08	1.26538197154238e-07	proopiomelanocortin	POMC	7838	chr2
ENSG00000119772	3044.72285481804	-0.24511275928749	0.045761483649759	-5.35631145973085	8.49380433453285e-08	3.89507955812484e-07	DNA methyltransferase 3 alpha	DNMT3A	108955	chr2
ENSG00000138101	566.586766980293	0.734175560405427	0.08360847020315	8.78111462417078	1.61862485099358e-18	1.67174343939271e-17	dystrobrevin beta	DTNB	44680	chr2
ENSG00000143970	1021.74661908386	0.0754705038181984	0.0881671348987816	0.85599360696977	0.392001315642016	0.490132883275282	additional sex combs like 2, transcriptional regulator	ASXL2	38382	chr2
ENSG00000084731	1671.17142690174	-0.121661177549561	0.0767912226466813	-1.58431098446404	0.113122967345614	0.175020675836868	kinesin family member 3C	KIF3C	55989	chr2
ENSG00000084733	9361.75024794624	0.156753358889395	0.0400919576168333	3.90984547044367	9.23551839206515e-05	0.000285400342190804	RAB10, member RAS oncogene family	RAB10	103595	chr2
ENSG00000157833	5007.00837411148	-0.0300002143780573	0.0583645717523128	-0.514014126675547	0.60724211403137	0.691529176045644	GRB2 associated regulator of MAPK1 subtype 2	GAREM2	8948	chr2
ENSG00000084754	9421.24127437725	-0.15205270851073	0.0361302634389869	-4.20845834040211	2.57118920409018e-05	8.64158982560185e-05	hydroxyacyl-CoA dehydrogenase/3-ketoacyl-CoA thiolase/enoyl-CoA hydratase (trifunctional protein), alpha subunit	HADHA	54091	chr2
ENSG00000138029	10781.2153590539	0.118182569023024	0.0368043994516226	3.21109896599098	0.00132228388204469	0.00333608102468669	hydroxyacyl-CoA dehydrogenase/3-ketoacyl-CoA thiolase/enoyl-CoA hydratase (trifunctional protein), beta subunit	HADHB	45718	chr2
ENSG00000173567	15.0448878833285	0.575305996979581	0.31418600213969	1.8311000269318	0.0670856145199263	0.111596867959564	adhesion G protein-coupled receptor F3	ADGRF3	37629	chr2
ENSG00000138018	4738.53704940286	0.119314011185582	0.0570227472586802	2.09239324517847	0.0364033525504636	0.0655812905157246	selenoprotein I	SELENOI	49806	chr2
ENSG00000171303	56.6539204998619	-0.97598045365963	0.213964646589387	-4.56140988344026	5.08112829133342e-06	1.88456572352025e-05	potassium two pore domain channel subfamily K member 3	KCNK3	38486	chr2
ENSG00000213699	2360.55211383066	0.0124403267853527	0.0576973101072648	0.215613635405618	0.829288926277701	0.872394757944806	solute carrier family 35 member F6	SLC35F6	16958	chr2
ENSG00000115163	384.273810631622	-0.435006154546122	0.108203712951192	-4.02025164092421	5.81360094130821e-05	0.000185086340493343	centromere protein A	CENPA	8574	chr2
ENSG00000157851	5417.23822776664	0.298982104957611	0.0454545533461057	6.57760516710096	4.7808570088823e-11	2.9457062212669e-10	dihydropyrimidinase like 5	DPYSL5	102251	chr2
ENSG00000084764	219.608779227749	-0.182860034074888	0.128195326716245	-1.42641731768928	0.153747917814128	0.226513737532807	microtubule associated protein RP/EB family member 3	MAPRE3	9214	chr2
ENSG00000119777	670.821112340818	-0.203754823745008	0.103004878514446	-1.97810848072047	0.0479164700543275	0.08340419626036	transmembrane protein 214	TMEM214	8792	chr2
ENSG00000084693	1937.5475920342	-0.0824914557726136	0.0603506188426046	-1.36687008939797	0.171666028772111	0.248442981601056	ATP/GTP binding protein like 5	AGBL5	19000	chr2
ENSG00000228474	2599.16374709746	0.0849044023545695	0.0528260617337585	1.6072445979881	0.10800072228488	0.168265056554815	oligosaccharyltransferase complex subunit 4, non-catalytic	OST4	1226	chr2
ENSG00000138080	133.562316300565	0.714253842921249	0.155856916834255	4.58275357570956	4.58892710259258e-06	1.71518345534585e-05	elastin microfibril interfacer 1	EMILIN1	4583	chr2
ENSG00000138030	234.293747742807	-0.592633691397162	0.130242097445795	-4.55024683277854	5.35830217283181e-06	1.97898264584677e-05	ketohexokinase	KHK	14009	chr2
ENSG00000138028	254.768005491638	-0.43120092467758	0.126184037819546	-3.41723828250159	0.000632598848978931	0.0016943099789539	cell growth regulator with EF-hand domain 1	CGREF1	18049	chr2
ENSG00000143994	25.7440335078197	-0.129936573327121	0.285909132556101	-0.454468075802458	0.649491964369079	0.727151146614823	abhydrolase domain containing 1	ABHD1	7024	chr2
ENSG00000138073	2062.01558183061	-0.0128015061036324	0.0530541593900507	-0.241291281415215	0.809329367719415	0.856609567329989	prolactin regulatory element binding	PREB	3918	chr2
ENSG00000138074	1145.58390130119	0.0395127506425661	0.0646925153470105	0.610777775923843	0.541346708212583	0.633750785632135	solute carrier family 5 member 6	SLC5A6	4695	chr2
ENSG00000138085	3473.84427281025	0.08207975274577	0.0581734050566978	1.41094977448496	0.158259424081297	0.232037608276651	all-trans retinoic acid induced differentiation factor	ATRAID	5148	chr2
ENSG00000084774	3073.95341737827	-0.41004761816008	0.0460738381368163	-8.89979291376688	5.59509813271283e-19	5.97251138328073e-18	carbamoyl-phosphate synthetase 2, aspartate transcarbamylase, and dihydroorotase	CAD	26397	chr2
ENSG00000115194	10.286195126548	1.27687787931293	0.34590088738762	3.6914559224072	0.000222974041496689	0.000649220675917074	solute carrier family 30 member 3	SLC30A3	8521	chr2
ENSG00000163794	20.6954404284128	0.0155197467658679	0.291915277246582	0.0531652433961459	0.957600248184182	0.96978751000213	urocortin	UCN	866	chr2
ENSG00000115204	1519.32553852524	-0.0364848360668566	0.0642264922620966	-0.568065213930237	0.569990687135417	0.658640228822732	MPV17, mitochondrial inner membrane protein	MPV17	13610	chr2
ENSG00000115207	2476.05797194116	-0.100978327227813	0.0531939579359102	-1.89830445310113	0.0576559877041746	0.097615100072167	general transcription factor IIIC subunit 2	GTF3C2	9580	chr2
ENSG00000115211	968.332527771334	0.0425602462769918	0.0739002978031296	0.575914408225693	0.564673036280694	0.653574039100092	eukaryotic translation initiation factor 2B subunit delta	EIF2B4	5978	chr2
ENSG00000115234	4656.06351055051	0.138200110073121	0.0482311212041143	2.86537212121313	0.00416519463861496	0.00947588546358066	sorting nexin 17	SNX17	7038	chr2
ENSG00000163795	894.054853727821	0.310812119554001	0.0698229298335532	4.45143336572853	8.52990023779453e-06	3.05918701229993e-05	zinc finger protein 513	ZNF513	3514	chr2
ENSG00000115241	3977.49609083115	-0.048128856842303	0.0417944108242855	-1.15156203648017	0.249501089108283	0.339150029405174	protein phosphatase, Mg2+/Mn2+ dependent 1G	PPM1G	28485	chr2
ENSG00000115216	5098.67298969591	0.488553528499361	0.0425004594240919	11.4952528777235	1.39372265425864e-30	2.35737750880341e-29	nuclear receptor binding protein 1	NRBP1	14468	chr2
ENSG00000138002	940.811476219934	-0.24527163792532	0.0655014694605417	-3.74452115266013	0.00018073815033723	0.000534354611668335	intraflagellar transport 172	IFT172	5822	chr2
ENSG00000115226	2585.4424224067	-0.235494885498202	0.0542577042614001	-4.34030316438835	1.42286274190738e-05	4.95578032837924e-05	fibronectin type III domain containing 4	FNDC4	3377	chr2
ENSG00000243943	1162.765613336	0.196329399810527	0.0632074515070302	3.10611162338495	0.00189565142671035	0.00464379888596789	zinc finger protein 512	ZNF512	40247	chr2
ENSG00000176714	274.890003724137	-0.518116424439109	0.109892538710999	-4.71475525560184	2.42001455471072e-06	9.43024592062428e-06	coiled-coil domain containing 121	CCDC121	3240	chr2
ENSG00000198522	1431.56627639323	0.139625719088367	0.0696808041637723	2.00379029438584	0.0450925289479964	0.0790488005903981	GPN-loop GTPase 1	GPN1	21851	chr2
ENSG00000119760	1532.01105438072	0.0748994242250521	0.060012403701029	1.24806572651526	0.212006988354213	0.296619168022053	SPT7-like STAGA complex gamma subunit	SUPT7L	12771	chr2
ENSG00000163798	1174.29298250955	0.0706713004428349	0.0649009706635455	1.08890976082937	0.276193681464632	0.368495047052698	solute carrier family 4 member 1 adaptor protein	SLC4A1AP	31510	chr2
ENSG00000243147	749.563953353487	-0.150588029473232	0.0799005053702922	-1.88469433047193	0.0594711182567799	0.100143442489624	mitochondrial ribosomal protein L33	MRPL33	8025	chr2
ENSG00000171174	83.6689504162717	-0.400249507903209	0.184213372665919	-2.17274947041485	0.0297991782294403	0.0549996693599514	ribokinase	RBKS	108958	chr2
ENSG00000158019	532.676540564331	-0.109784803426036	0.0950538912695325	-1.15497431993324	0.248100942762921	0.337541645948582	brain and reproductive organ-expressed (TNFRSF1A modulator)	BRE	448286	chr2
ENSG00000075426	632.504013903209	1.40780747082099	0.0846256417514822	16.6357080629918	3.8418738305745e-62	1.3252572166797e-60	FOS like 2, AP-1 transcription factor subunit	FOSL2	21738	chr2
ENSG00000163803	52.4532100734585	0.874158098394978	0.215196449997092	4.06213995819537	4.86249082916612e-05	0.000156190789134109	phospholipase B1	PLB1	41888	chr2
ENSG00000213639	19761.3473178051	0.146447294547456	0.0378011119717056	3.87415308462547	0.000106996141763502	0.000327966943619577	protein phosphatase 1 catalytic subunit beta	PPP1CB	51193	chr2
ENSG00000163806	16.6935824468863	0.337822072177113	0.303779814579422	1.1120622765697	0.266111374838797	0.357050182469569	speedy/RINGO cell cycle regulator family member A	SPDYA	58293	chr2
ENSG00000171103	636.180253999282	-0.0223497698838817	0.0794323484423523	-0.281368615207216	0.778427687570403	0.832378316652458	tRNA methyltransferase 61B	TRMT61B	20488	chr2
ENSG00000163811	2849.40116901292	0.113342637026805	0.0520969504321783	2.17560982143011	0.0295844483248983	0.0546393510207306	WD repeat domain 43	WDR43	53548	chr2
ENSG00000115295	1247.66888351107	-0.1871480656353	0.0623728607496955	-3.00047269575035	0.00269560920096477	0.00638889945160121	CAP-Gly domain containing linker protein family member 4	CLIP4	68372	chr2
ENSG00000171094	2787.20574000269	0.448939338857456	0.0545244118485456	8.23373097731876	1.8147097402635e-16	1.67866644071271e-15	anaplastic lymphoma receptor tyrosine kinase	ALK	30826	chr2
ENSG00000119801	2442.78960040466	0.203724985435766	0.0572041526364864	3.56136706945685	0.000368928880012175	0.00103295661026999	yippee like 5	YPEL5	13018	chr2
ENSG00000213626	816.768738364457	-0.733996040338426	0.0758396569112166	-9.67826161447031	3.73004206519819e-22	4.66005701365751e-21	limb bud and heart development	LBH	28503	chr2
ENSG00000172954	350.677972287315	-0.190429122764517	0.133360239370568	-1.42793027114605	0.153311929614633	0.225990271997993	lysocardiolipin acyltransferase 1	LCLAT1	196955	chr2
ENSG00000013016	669.898203758071	0.205538745577262	0.0754400092311824	2.72453234923923	0.00643926219131016	0.0139793111946522	EH domain containing 3	EHD3	34381	chr2
ENSG00000162959	170.23166915136	-0.235040812026678	0.137590187927243	-1.70826725050312	0.0875867650884084	0.140577599988963	mediator of cell motility 1	MEMO1	142805	chr2
ENSG00000162961	1088.29911388061	0.02014096698117	0.0640522149241016	0.314446065683068	0.753182273716662	0.812596698513355	dpy-30, histone methyltransferase complex regulatory subunit	DPY30	15891	chr2
ENSG00000021574	3560.19899579146	-0.199572004465807	0.0489626439855526	-4.07600546499684	4.58159423896932e-05	0.000147880219674499	spastin	SPAST	94027	chr2
ENSG00000152683	1441.81283181832	-0.118146524601204	0.0571383263512555	-2.06772812831275	0.0386655953530329	0.0691585776397479	solute carrier family 30 member 6	SLC30A6	58272	chr2
ENSG00000119820	2192.64595654548	-0.342999954893438	0.0571975827712632	-5.99675612630548	2.01298012269312e-09	1.0893271490849e-08	Yip1 domain family member 4	YIPF4	28701	chr2
ENSG00000115760	10104.4925566489	-0.213436573644659	0.0585281896891165	-3.64673116968708	0.000265597537753679	0.000763483890853915	baculoviral IAP repeat containing 6	BIRC6	261870	chr2
ENSG00000018699	886.875792911943	0.253386478299999	0.0718453253402141	3.52683319478505	0.000420561628430767	0.00116287573665802	tetratricopeptide repeat domain 27	TTC27	193032	chr2
ENSG00000049323	6325.8740728403	0.0145640812207304	0.0485253147446381	0.300133678624717	0.764075190869679	0.820493256258998	latent transforming growth factor beta binding protein 1	LTBP1	452207	chr2
ENSG00000152689	829.765625434731	4.73763879076623	0.120704848045007	39.2497804976295	0	0	RAS guanyl releasing protein 3	RASGRP3	46588	chr2
ENSG00000119812	1001.47742622343	-0.386895701881033	0.101549876243798	-3.80990815736876	0.000139018424990518	0.000418969882072779	family with sequence similarity 98 member A	FAM98A	15634	chr2
ENSG00000150938	7911.14449081395	0.581583553981225	0.0378318567777842	15.3728524982877	2.48962194061427e-53	7.248888831248e-52	cysteine rich transmembrane BMP regulator 1	CRIM1	194909	chr2
ENSG00000171055	6003.79696901939	0.110410157653326	0.044602207477771	2.47544155092218	0.0133071541286069	0.0268888607085759	fasciculation and elongation protein zeta 2	FEZ2	42306	chr2
ENSG00000115808	2405.11624971394	0.0140077006312335	0.0650600742437095	0.215304098466932	0.829530234444348	0.872583065449384	striatin	STRN	128775	chr2
ENSG00000008869	2186.80876271176	-0.589648395606778	0.0499379824974907	-11.8076134861157	3.56538009905934e-32	6.40168567786231e-31	HEAT repeat containing 5B	HEATR5B	33011	chr2
ENSG00000152133	1020.55302383891	-1.49160030140088	0.0811068741551268	-18.3905534141042	1.56375639748968e-75	6.29322078932267e-74	G-patch domain containing 11	GPATCH11	12145	chr2
ENSG00000055332	19509.9430018976	2.14769332052957	0.121253063535377	17.7124870738045	3.35896768031616e-70	1.25446246300874e-68	eukaryotic translation initiation factor 2 alpha kinase 2	EIF2AK2	42682	chr2
ENSG00000218739	530.225613845686	-0.258406941266353	0.219410418510115	-1.17773323172637	0.238902974163392	0.327445307609934	CEBPZ opposite strand	CEBPZOS	8252	chr2
ENSG00000115816	3367.43587198432	-0.107707843135367	0.0486155425610603	-2.21550223367532	0.0267256111994242	0.0500190010487687	CCAAT/enhancer binding protein zeta	CEBPZ	29966	chr2
ENSG00000003509	530.631871613075	-0.111788515587593	0.0910516496072549	-1.22774838314062	0.21954143763229	0.305178941343943	NADH:ubiquinone oxidoreductase complex assembly factor 7	NDUFAF7	17530	chr2
ENSG00000115825	8252.64939256144	0.0424793512394616	0.0383077643056243	1.10889664300312	0.267474772199313	0.358638983690893	protein kinase D3	PRKD3	22729	chr2
ENSG00000115828	764.076985669272	0.608091028680307	0.0759136476206163	8.01029917201823	1.14429733913205e-15	1.01237424096932e-14	glutaminyl-peptide cyclotransferase	QPCT	28713	chr2
ENSG00000163171	557.273539961705	0.349521752818537	0.0912665886221363	3.82967916403267	0.000128310436851903	0.000388453884157133	CDC42 effector protein 3	CDC42EP3	30318	chr2
ENSG00000115841	137.469095460326	-0.122052388486729	0.150561592027195	-0.810647568502616	0.417568091269918	0.515927756350702	regulator of microtubule dynamics 2	RMDN2	88983	chr2
ENSG00000138061	119.481344859539	-0.0897522107243881	0.179207436661567	-0.500828606202793	0.616491751336894	0.699219871839424	cytochrome P450 family 1 subfamily B member 1	CYP1B1	8578	chr2
ENSG00000119787	1634.29092020391	0.23719889495391	0.0562599907465224	4.21612040468692	2.48541094140567e-05	8.3774200323433e-05	atlastin GTPase 2	ATL2	81644	chr2
ENSG00000143889	3828.99844542648	0.0297472696334204	0.0421138621735101	0.706353397626201	0.47996839422283	0.576348912037275	heterogeneous nuclear ribonucleoprotein L like	HNRNPLL	39851	chr2
ENSG00000143891	651.509019443811	-0.151818004880037	0.0806192239551263	-1.88314892443695	0.0596801885470388	0.100459259687654	galactose mutarotase	GALM	68858	chr2
ENSG00000115875	6078.34196903644	0.0820667196757876	0.0463086017542829	1.77217010591769	0.0763663243445541	0.124782449241101	serine and arginine rich splicing factor 7	SRSF7	7896	chr2
ENSG00000152147	607.312002757188	-0.262454840096365	0.0804743526310862	-3.26134764077595	0.00110884004059465	0.00283743920492016	gem nuclear organelle associated protein 6	GEMIN6	3849	chr2
ENSG00000163214	1473.63426706137	-0.300186761919972	0.0572737204480923	-5.24126527090263	1.59479254000672e-07	7.11534549945655e-07	DEAH-box helicase 57	DHX57	78146	chr2
ENSG00000188010	639.684964140484	0.18889465046724	0.0796234138523734	2.37235056031963	0.0176753116211603	0.0346358946766965	MORN repeat containing 2	MORN2	6748	chr2
ENSG00000214694	26.8254576384158	-0.290995430088166	0.263458636472148	-1.10452036792094	0.269367473169048	0.360658839553778	Rho guanine nucleotide exchange factor 33	ARHGEF33	56087	chr2
ENSG00000115904	1186.48914459808	-0.0923733293657721	0.178857210226029	-0.516464107032846	0.605530301452142	0.689916357943154	SOS Ras/Rac guanine nucleotide exchange factor 1	SOS1	53762	chr2
ENSG00000205111	23.0726922271688	-0.0319276505149942	0.279646471722636	-0.114171476286893	0.909101862654932	0.933292155584396	cyclin dependent kinase like 4	CDKL4	50986	chr2
ENSG00000011566	1725.65666370002	-0.01979861954736	0.0524774031428567	-0.377278949826522	0.705966313937802	0.774362329785316	mitogen-activated protein kinase kinase kinase kinase 3	MAP4K3	188047	chr2
ENSG00000231312	128.591959501176	0.240151072396967	0.164973199092376	1.45569749340009	0.145476263130128	0.216169237680365	uncharacterized LOC728730	LOC728730	167439	chr2
ENSG00000152154	87.6303414185776	-0.515908575197305	0.177170101598314	-2.91193926369693	0.00359192470575079	0.00827655569332673	transmembrane protein 178A	TMEM178A	52062	chr2
ENSG00000138050	500.96739437845	0.104752175345746	0.0915748811583887	1.14389638316391	0.252666611190998	0.342488955645559	THUMP domain containing 2	THUMPD2	17946	chr2
ENSG00000227028	12.48334328717	1.99106032631675	0.342428743693937	5.81452451928614	6.08064729759092e-09	3.13431966885392e-08	SLC8A1 antisense RNA 1	SLC8A1-AS1	337576	chr2
ENSG00000183023	593.154801826472	1.11851721026132	0.0898377543331699	12.4504137326632	1.3912210088707e-35	2.76369506797647e-34	solute carrier family 8 member A1	SLC8A1	83963	chr2
ENSG00000162878	100.698493686485	-0.0697061444719922	0.173504318741169	-0.401754521027104	0.687864695391193	0.758546855035722	protein kinase domain containing, cytoplasmic	PKDCC	10508	chr2
ENSG00000143924	1472.59236476597	0.173222400189297	0.0552725340768259	3.13396885238746	0.00172459161229394	0.00425526876853007	echinoderm microtubule associated protein like 4	EML4	31308	chr2
ENSG00000115944	2067.27910184299	-0.0301217863334331	0.0544135962752515	-0.553570952764486	0.579872509801394	0.667251211878114	cytochrome c oxidase subunit 7A2 like	COX7A2L	18506	chr2
ENSG00000057935	1144.45350898321	-0.0147404583610209	0.0650779005095636	-0.226504823382474	0.820808808192918	0.865228613483503	metastasis associated 1 family member 3	MTA3	140683	chr2
ENSG00000162882	18.7965962336289	-0.497711208630733	0.29426107168716	-1.6913933119902	0.0907617087944214	0.144906262159812	3-hydroxyanthranilate 3,4-dioxygenase	HAAO	22725	chr2
ENSG00000152518	800.852115705588	0.445847965825281	0.0959738682682504	4.64551417870456	3.39230472584122e-06	1.29066089881571e-05	ZFP36 ring finger protein like 2	ZFP36L2	4205	chr2
ENSG00000279873	19.1909490156581	0.370584347919767	0.294383687959883	1.25884810564052	0.208085200900134	0.292241600341594	long intergenic non-protein coding RNA 1126	LINC01126	1645	chr2
ENSG00000115970	1625.46656489062	-0.0790489919809578	0.0590745238893182	-1.33812321753221	0.180856273412397	0.259358192621403	THADA, armadillo repeat containing	THADA	172540	chr2
ENSG00000152527	1045.23375110945	0.154777928814673	0.0701176754770026	2.20740245254476	0.0272859551927216	0.050904462831233	pleckstrin homology, MyTH4 and FERM domain containing H2	PLEKHH2	75084	chr2
ENSG00000138036	904.946088893091	0.120225162096719	0.0778182148073492	1.54494885798081	0.122358634207274	0.187104702666528	dynein cytoplasmic 2 light intermediate chain 1	DYNC2LI1	21139	chr2
ENSG00000138095	8069.14290621651	-0.374841979548696	0.0393457823634623	-9.52686557573159	1.6210372687133e-21	1.96900493914395e-20	leucine rich pentatricopeptide repeat containing	LRPPRC	21827	chr2
ENSG00000138032	2784.0437693938	0.214004435466897	0.0588110848743399	3.63884522661255	0.000273863321947395	0.000784988911967513	protein phosphatase, Mg2+/Mn2+ dependent 1B	PPM1B	75524	chr2
ENSG00000138079	35.8551960393905	-0.23440748523426	0.277270655243428	-0.845410362767975	0.397881760640668	0.496105354127447	solute carrier family 3 member 1	SLC3A1	17018	chr2
ENSG00000138078	5105.21568080948	-0.314849979629259	0.0482514133885915	-6.52519703606656	6.79121980310951e-11	4.13166956309942e-10	prolyl endopeptidase-like	PREPL	43066	chr2
ENSG00000143919	160.246705271929	-0.290523792899604	0.137884813207876	-2.10700356435635	0.0351172706095942	0.0635176772423307	calmodulin-lysine N-methyltransferase	CAMKMT	410689	chr2
ENSG00000068784	2443.33359858866	-0.119715720862882	0.0484587501334632	-2.47046654181476	0.0134936941010105	0.0272350753730691	S1 RNA binding domain 1	SRBD1	179336	chr2
ENSG00000171132	619.312106225123	1.00244175142613	0.0870004902168183	11.5222540577403	1.01909647574578e-30	1.73419758721988e-29	protein kinase C epsilon	PRKCE	169025	chr2
ENSG00000116016	268.885334035078	-1.01710757859948	0.156432824812567	-6.50188079016117	7.93219502529186e-11	4.79243321852601e-10	endothelial PAS domain protein 1	EPAS1	7004	chr2
ENSG00000250565	223.45764802932	-0.577607497099389	0.127375078213324	-4.53469787969063	5.76859976903755e-06	2.11989608410839e-05	ATPase H+ transporting V1 subunit E2	ATP6V1E2	8111	chr2
ENSG00000119729	4969.24694855177	-0.377127660880058	0.0407596887712182	-9.25246664656479	2.19370659374161e-20	2.4977935646627e-19	ras homolog family member Q	RHOQ	41961	chr2
ENSG00000151665	1018.8892591849	-0.109613603027474	0.065764203659943	-1.66676697849594	0.0955607487463529	0.151543005726596	phosphatidylinositol glycan anchor biosynthesis class F	PIGF	35839	chr2
ENSG00000119878	766.220678828185	-0.182179138547689	0.0901461874938964	-2.02093004277107	0.0432870074223946	0.076265509995048	CXXC repeat containing interactor of PDZ3 domain	CRIPT	8557	chr2
ENSG00000171150	1273.47352851381	0.139513958539028	0.0591735669794582	2.35770743020206	0.0183881788447723	0.0358361138111277	suppressor of cytokine signaling 5	SOCS5	63579	chr2
ENSG00000180398	5168.61907973428	0.247909437098278	0.0387116284379962	6.40400435479873	1.51353791373919e-10	8.98943955976142e-10	multiple coagulation factor deficiency 2	MCFD2	39986	chr2
ENSG00000068724	339.151399552541	-0.00691159224265692	0.101408336124189	-0.0681560560681388	0.945661407763726	0.961311462272699	tetratricopeptide repeat domain 7A	TTC7A	125774	chr2
ENSG00000143933	27039.1747188483	0.327105523868025	0.0444215391000652	7.36366930310943	1.78922619766513e-13	1.34344458874806e-12	calmodulin 2	CALM2	16520	chr2
ENSG00000236824	38.2483843554353	-0.329454083091981	0.240184993317281	-1.37166805694966	0.170166796751587	0.246732165701002	brain cytoplasmic RNA 1	BCYRN1	518928	chrX
ENSG00000095002	3689.46209401611	-0.148624976326731	0.0466380290909367	-3.18677652601778	0.00143867887616798	0.00360441818617756	mutS homolog 2	MSH2	80162	chr2
ENSG00000116062	4989.44008316288	-0.273585145221267	0.0481952969113122	-5.6765942478726	1.37402865879952e-08	6.83840489214189e-08	mutS homolog 6	MSH6	18251	chr2
ENSG00000138081	2640.46955421965	-0.0287966709057246	0.0563851078165353	-0.510714123300474	0.609551249747487	0.693425818594229	F-box protein 11	FBXO11	25567	chr2
ENSG00000170802	4982.0001539323	-0.197033317502113	0.0480537013171963	-4.10027348781151	4.12662172380759e-05	0.000134306498947871	forkhead box N2	FOXN2	64640	chr2
ENSG00000162869	602.58050779468	0.0449019506988756	0.0820691023308892	0.547123697269629	0.58429375283767	0.670960479541782	protein phosphatase 1 regulatory subunit 21	PPP1R21	55137	chr2
ENSG00000243244	67.381871686232	0.156357062238403	0.194018807213249	0.805886112198124	0.420308519632832	0.51867308286702	stonin 1	STON1	68347	chr2
ENSG00000179915	17530.9875434097	-0.256413144286111	0.0412954464937606	-6.2092353045475	5.32430487792084e-10	3.03734785398295e-09	neurexin 1	NRXN1	55662	chr2
ENSG00000115239	322.032952759374	0.337038991890132	0.122200090514101	2.7580911803927	0.00581399782224736	0.0127745590681792	ankyrin repeat and SOCS box containing 3	ASB3	117030	chr2
ENSG00000143942	335.99638262344	-0.458291782828577	0.113010104619283	-4.05531686190811	5.00663865530016e-05	0.000160526498094045	ChaC cation transport regulator homolog 2	CHAC2	7359	chr2
ENSG00000068912	3846.22628876995	0.063111562324332	0.0433740473706121	1.45505356659644	0.14565443252614	0.216365117472273	endoplasmic reticulum lectin 1	ERLEC1	31889	chr2
ENSG00000119737	232.819802421486	-0.893245127112429	0.14398115678865	-6.20390297616253	5.50797508029956e-10	3.13701468074808e-09	G protein-coupled receptor 75	GPR75	7121	chr2
ENSG00000068878	1392.64829946095	-0.0189350284233388	0.0637177737254607	-0.297170276301927	0.766336513448274	0.822291056607652	proteasome activator subunit 4	PSME4	106774	chr2
ENSG00000170634	554.632261932879	0.0389171672798636	0.0873635564907633	0.445462259586218	0.655985727779549	0.732448631368746	acylphosphatase 2	ACYP2	190026	chr2
ENSG00000115306	21278.1441593203	-0.0564083476049684	0.0417828707378389	-1.35003523235383	0.177004681779294	0.254669259124616	spectrin beta, non-erythrocytic 1	SPTBN1	13625	chr2
ENSG00000214595	141.732137959235	-1.05678039049338	0.157369733798042	-6.71527087825914	1.87717172890723e-11	1.19927981654037e-10	echinoderm microtubule associated protein like 6	EML6	247008	chr2
ENSG00000115310	18387.5034941672	0.17792725466937	0.0381627220944951	4.66233132502452	3.12647309915684e-06	1.19667274538649e-05	reticulon 4	RTN4	38144	chr2
ENSG00000162994	306.301572636245	-0.0308406525096897	0.110985187455794	-0.277880798480191	0.781103864219856	0.834111434116072	clathrin heavy chain linker domain containing 1	CLHC1	59763	chr2
ENSG00000143947	13679.9046538394	-0.3051665594612	0.0423863706306465	-7.19963882070516	6.03722632343546e-13	4.36957905218159e-12	ribosomal protein S27a	RPS27A	3176	chr2
ENSG00000085760	1393.24601566452	-0.0632635653217287	0.0632151492623597	-1.00076589330143	0.316940002287021	0.413252465508773	mitochondrial translational initiation factor 2	MTIF2	32629	chr2
ENSG00000115355	11078.3850432644	-0.408881329852467	0.126525678495196	-3.23160748644389	0.00123096017830566	0.00312538022066185	coiled-coil domain containing 88A	CCDC88A	32836	chr2
ENSG00000163001	1440.67024401717	-0.0141124786747394	0.0594287919911269	-0.237468711745756	0.812293189468032	0.858967541414965	cilia and flagella associated protein 36	CFAP36	25477	chr2
ENSG00000275052	4860.6040336289	0.107390238811617	0.0465305381829878	2.30795178833502	0.0210018181431662	0.0403969871027391	protein phosphatase 4 regulatory subunit 3B	PPP4R3B	69600	chr2
ENSG00000138035	15030.0481365125	3.38464857524326	0.0380515705962581	88.9489848173599	0	0	polyribonucleotide nucleotidyltransferase 1	PNPT1	59848	chr2
ENSG00000115380	198.892910021669	-0.246483860916058	0.129162810556991	-1.9083191195139	0.0563499833188471	0.0957628341682386	EGF containing fibulin like extracellular matrix protein 1	EFEMP1	58202	chr2
ENSG00000028116	107.378805286127	1.21934940893539	0.167436403407061	7.28246297772525	3.27779910728124e-13	2.41227411967807e-12	vaccinia related kinase 2	VRK2	252270	chr2
ENSG00000115392	989.823624961668	0.0575539387508263	0.0693799862455183	0.829546701654817	0.406795121748168	0.504888840843946	Fanconi anemia complementation group L	FANCL	82138	chr2
ENSG00000119866	50.5013936074612	0.148698915742085	0.221392973115924	0.6716514695533	0.501805603531155	0.597448565625591	B-cell CLL/lymphoma 11A	BCL11A	102332	chr2
ENSG00000115421	821.946297803683	-0.117598086661427	0.0816684481552803	-1.43994516019004	0.149882914956497	0.221658946564493	poly(A) polymerase gamma	PAPOLG	45857	chr2
ENSG00000162924	110.096788154739	0.336388398382671	0.161412127448041	2.08403422779342	0.0371570539654746	0.0667587608449611	REL proto-oncogene, NF-kB subunit	REL	41427	chr2
ENSG00000162927	209.809949466221	0.0574470876617915	0.123398190478949	0.465542383067537	0.641543092799605	0.720856339837129	pseudouridylate synthase 10	PUS10	77818	chr2
ENSG00000162928	2013.10217658585	-0.116678215171621	0.0558722165628482	-2.08830474875423	0.0367703533727726	0.0661658485141566	peroxisomal biogenesis factor 13	PEX13	34314	chr2
ENSG00000162929	887.653002295268	-0.458261662298671	0.070484010699481	-6.50163998545055	7.94490556689191e-11	4.79605183035867e-10	KIAA1841	KIAA1841	71807	chr2
ENSG00000212978	349.43589631873	0.409973781483391	0.108936229769432	3.76342913970052	0.000167599232263915	0.000497399289649529	uncharacterized LOC339803	LOC339803	3384	chr2
ENSG00000173209	795.496469047071	-0.0215252286411997	0.0781251677233374	-0.275522335099829	0.782914968668416	0.835494625553976	AHA1, activator of heat shock 90kDa protein ATPase homolog 2 (yeast)	AHSA2	10132	chr2
ENSG00000115464	6727.75885321848	-0.547607029305853	0.0621443154301551	-8.81186035304093	1.23085897952458e-18	1.28547203640878e-17	ubiquitin specific peptidase 34	USP34	53559	chr2
ENSG00000082898	18818.0191816467	0.0478732538210729	0.039844002693535	1.20151718162695	0.229550645696426	0.316890763230995	exportin 1	XPO1	60301	chr2
ENSG00000170264	519.973099916569	-0.0499080346248176	0.0968911410227982	-0.515093888852795	0.606487412923083	0.69089443777353	family with sequence similarity 161 member A	FAM161A	29296	chr2
ENSG00000115484	9595.1567391441	0.00917726962848118	0.047208183325501	0.194399974368931	0.845862709987583	0.88570521520569	chaperonin containing TCP1 subunit 4	CCT4	20545	chr2
ENSG00000173163	626.825584650486	0.094351790804563	0.0793467096071158	1.18910779377928	0.23439725184827	0.322342253744601	copper metabolism domain containing 1	COMMD1	230403	chr2
ENSG00000170340	716.018674600074	0.888623299347906	0.0750570321687515	11.8393077060389	2.44462498794501e-32	4.42910387531305e-31	UDP-GlcNAc:betaGal beta-1,3-N-acetylglucosaminyltransferase 2	B3GNT2	28605	chr2
ENSG00000186889	159.280312756804	0.00142995751905073	0.146853411532891	0.0097373122226068	0.992230871686032	0.994677007720785	transmembrane protein 17	TMEM17	6249	chr2
ENSG00000115504	1911.32370142966	-0.037175723188547	0.0660704058055975	-0.562668304141058	0.573660771186678	0.661625553855672	EH domain binding protein 1	EHBP1	339590	chr2
ENSG00000231609	178.318903674289	-0.00388774422041666	0.134132541398191	-0.0289843477197332	0.976877074060578	0.983619485384887	uncharacterized LOC100132215	LOC100132215	3747	chr2
ENSG00000115507	189.716407144142	-0.0216829775030909	0.164951071127784	-0.131450965154955	0.895418574031299	0.923237659523547	orthodenticle homeobox 1	OTX1	7030	chr2
ENSG00000143951	399.759479900102	0.0221429372757096	0.0976855424210968	0.226675685335883	0.820675935295207	0.86521879507749	WD repeat containing planar cell polarity effector	WDPCP	321830	chr2
ENSG00000014641	5728.36922689331	-0.215839288662969	0.0448081212341746	-4.81696805663772	1.45756011245141e-06	5.81239446892996e-06	malate dehydrogenase 1	MDH1	18046	chr2
ENSG00000169764	4469.09212912877	0.0765998388837484	0.0403727817467043	1.89731387260679	0.0577865251430595	0.0977888212455955	UDP-glucose pyrophosphorylase 2	UGP2	50599	chr2
ENSG00000143952	2186.08190404086	-0.0054389693035127	0.0541790193784324	-0.100388847304937	0.920035623599106	0.942523644170561	VPS54, GARP complex subunit	VPS54	126548	chr2
ENSG00000197329	4888.36413586484	0.47648013450068	0.0440857286634234	10.8080358189929	3.15349821361093e-27	4.82147843685819e-26	pellino E3 ubiquitin protein ligase 1	PELI1	51820	chr2
ENSG00000119862	1227.08206402006	-0.820721548025637	0.0705226357283174	-11.6377038315385	2.65055528002374e-31	4.61704312148414e-30	galectin like	LGALSL	7191	chr2
ENSG00000119844	1679.04849776355	0.0415416168302648	0.0547750079356527	0.758404578947137	0.448208817523275	0.545745478126714	aftiphilin	AFTPH	68700	chr2
ENSG00000179833	389.731218321671	-0.573313661470754	0.115556703532904	-4.96131893644323	7.00161180416483e-07	2.90282928707308e-06	SERTA domain containing 2	SERTAD2	22292	chr2
ENSG00000115902	5867.64509049384	0.717904036474606	0.0499443863293645	14.3740686238549	7.52759112849686e-47	1.93438373861649e-45	solute carrier family 1 member 4	SLC1A4	24419	chr2
ENSG00000011523	2542.64912452097	-0.0148286840952147	0.0463461790951256	-0.31995483521476	0.74900256846539	0.809460549565451	centrosomal protein 68	CEP68	30648	chr2
ENSG00000138069	5950.02435589257	-0.030734047193834	0.053075634868423	-0.579061320133525	0.562547798100352	0.651868435577977	RAB1A, member RAS oncogene family	RAB1A	43448	chr2
ENSG00000138071	6643.09739306639	-0.269223855025085	0.0705779332792065	-3.81456132981444	0.000136425054185432	0.000411774328419607	ARP2 actin related protein 2 homolog	ACTR2	37673	chr2
ENSG00000198369	1649.42440430446	0.0231233891814452	0.144164278188357	0.160396108328816	0.872569055035921	0.906619898789085	sprouty related EVH1 domain containing 2	SPRED2	100536	chr2
ENSG00000143995	2443.30832014068	-0.320515733456717	0.0477481476484006	-6.71263178242795	1.91145037504382e-11	1.21958371309744e-10	Meis homeobox 1	MEIS1	129015	chr2
ENSG00000143971	1272.1851017787	-0.104243947938854	0.0666330667895133	-1.56444769783972	0.117712466653967	0.181081183599386	Ewing tumor associated antigen 1	ETAA1	13092	chr2
ENSG00000197223	783.209424278331	0.0457791157064453	0.0729264104658394	0.627743987589921	0.530171664520097	0.623639691046864	C1D nuclear receptor corepressor	C1D	20828	chr2
ENSG00000243667	186.552901365233	-0.340985182280493	0.132001366157442	-2.58319434265392	0.00978901639233855	0.0204010676450449	WD repeat domain 92	WDR92	23463	chr2
ENSG00000115946	1010.07837278155	0.342138168148962	0.0751586415084117	4.55221330884047	5.30844721517908e-06	1.96160430735048e-05	partner of NOB1 homolog	PNO1	18090	chr2
ENSG00000221823	975.776142030947	-0.479475958211609	0.0863411218935451	-5.55327458916717	2.80367133377857e-08	1.35164946745504e-07	protein phosphatase 3 regulatory subunit B, alpha	PPP3R1	73663	chr2
ENSG00000119865	220.733495215273	-0.4391746886084	0.127297246337196	-3.4499936270819	0.000560599787541168	0.00151681497289476	cannabinoid receptor interacting protein 1	CNRIP1	27042	chr2
ENSG00000204923	56.8705977973608	-0.508189092348704	0.221646171420143	-2.29279436271156	0.021859846730942	0.0419035249749306	F-box protein 48	FBXO48	4886	chr2
ENSG00000169621	299.498451611997	0.0385993934168825	0.107768413581401	0.358169821138984	0.72021623034659	0.78605270464495	prokineticin receptor 1	PROKR1	68805	chr2
ENSG00000169604	1864.67554390781	-0.314785944463087	0.149342679611352	-2.10780967157066	0.0350474559390282	0.0634241659679662	anthrax toxin receptor 1	ANTXR1	159414	chr2
ENSG00000198380	2767.23460598634	-0.605102038327607	0.0567186611009968	-10.6684824109322	1.42941861965701e-26	2.14336271609169e-25	glutamine--fructose-6-phosphate transaminase 1	GFPT1	67486	chr2
ENSG00000169599	1087.87799895392	0.0371837251211069	0.0625281608469972	0.59467165861624	0.552062969986206	0.642857062830034	NFU1 iron-sulfur cluster scaffold	NFU1	41516	chr2
ENSG00000115977	626.435777148286	-0.626410982123857	0.114814815575964	-5.45583755007129	4.87425405781432e-08	2.29150480294359e-07	AP2 associated kinase 1	AAK1	99607	chr2
ENSG00000196975	917.941336500617	0.0132131148916629	0.0754117356721288	0.175212979437447	0.860912285977785	0.89766279302396	annexin A4	ANXA4	84470	chr2
ENSG00000087338	766.85851420824	-0.242063610782677	0.0777318283984525	-3.11408615711265	0.0018451560120658	0.00453040146370644	germ cell-less, spermatogenesis associated 1	GMCL1	49910	chr2
ENSG00000124380	984.998645502421	0.114454574403784	0.0796769302598192	1.4364832333595	0.150864883960299	0.222758323654611	small nuclear ribonucleoprotein U4/U6.U5 subunit 27	SNRNP27	11294	chr2
ENSG00000059728	548.151601987698	0.31841739320748	0.0838027889090611	3.7996037763494	0.000144927614653035	0.000435653840570028	MAX dimerization protein 1	MXD1	27904	chr2
ENSG00000244617	75.6877595645578	-0.0894597095017569	0.184801703476851	-0.484084874861358	0.628325635056133	0.7098822619362	aspartic peptidase, retroviral-like 1	ASPRV1	2174	chr2
ENSG00000179818	423.289168139009	-0.155965778179869	0.105009190922892	-1.48525835509384	0.137475399036232	0.206183654262415	PCBP1 antisense RNA 1	PCBP1-AS1	56274	chr2
ENSG00000169564	1820.33648859105	-0.0688026546757485	0.0568165910553033	-1.21096062607449	0.225910495356386	0.31254336535278	poly(rC) binding protein 1	PCBP1	1750	chr2
ENSG00000115998	566.822151447922	0.169572331922718	0.088765374508236	1.91034322631044	0.0560890355862163	0.0953772393619427	chromosome 2 open reading frame 42	C2orf42	41135	chr2
ENSG00000116001	4386.74359640352	0.28079089868092	0.0552106327035794	5.08581200632965	3.66056508641288e-07	1.57017500873545e-06	TIA1 cytotoxic granule associated RNA binding protein	TIA1	39204	chr2
ENSG00000116005	3840.67509665102	-0.433110632875841	0.0423746929824526	-10.2209739444058	1.59727886104638e-24	2.19743521109573e-23	prenylcysteine oxidase 1	PCYOX1	23476	chr2
ENSG00000143977	1629.34440663699	0.0700321583452866	0.0642269768557203	1.09038540771749	0.275543407033032	0.367837709989287	small nuclear ribonucleoprotein polypeptide G	SNRPG	12059	chr2
ENSG00000035141	1203.33380081794	-0.147775822236019	0.0630271997047044	-2.34463569583258	0.0190456786852059	0.0369694705455729	family with sequence similarity 136 member A	FAM136A	6113	chr2
ENSG00000163235	12.7539121282837	0.27078247278606	0.327256517051894	0.827431872787183	0.40799232143447	0.50592637344517	transforming growth factor alpha	TGFA	104697	chr2
ENSG00000075340	3362.92009241298	0.0226166376061204	0.0528387265402997	0.428031466444803	0.668628211347398	0.742537316622021	adducin 2	ADD2	93160	chr2
ENSG00000116035	130.751633483847	0.158197306991478	0.162159949482885	0.975563371202056	0.329280883497312	0.426051254007747	ventral anterior homeobox 2	VAX2	32856	chr2
ENSG00000116039	48.2393246521188	0.0334013988176666	0.221984525027666	0.15046724006326	0.88039599509558	0.91218065482826	ATPase H+ transporting V1 subunit B1	ATP6V1B1	24515	chr2
ENSG00000144043	1382.37929209206	-0.37667745783931	0.0741309270800974	-5.08124574554849	3.74967651779649e-07	1.60250899089838e-06	testis expressed 261	TEX261	8767	chr2
ENSG00000124357	1395.91932756178	0.116001742353179	0.0674256880305282	1.72043839286678	0.0853527832150438	0.137350997233907	N-acetylglucosamine kinase	NAGK	10591	chr2
ENSG00000124370	138.755518844372	-0.222468375659758	0.148605542993214	-1.49703955302607	0.134382966571459	0.202195256428156	methylmalonyl-CoA epimerase	MCEE	20589	chr2
ENSG00000124383	1173.53633087495	0.24859552032063	0.0633989802068901	3.92112806088344	8.81354060069314e-05	0.000273163760914274	M-phase phosphoprotein 10	MPHOSPH10	8900	chr2
ENSG00000124374	108.205973999748	-1.17100039660262	0.178321651029891	-6.56678754284485	5.14123181126579e-11	3.16218495901526e-10	poly(A) binding protein interacting protein 2B	PAIP2B	44366	chr2
ENSG00000075292	7645.93276292946	0.105519439489563	0.048893274861048	2.1581585563545	0.030915506355439	0.0568168946958003	zinc finger protein 638	ZNF638	103307	chr2
ENSG00000135636	27.1861610944025	1.75855032569624	0.285131293478876	6.16751077807082	6.93733856100989e-10	3.91763816721546e-09	dysferlin	DYSF	220062	chr2
ENSG00000144036	1839.951053768	-0.152632682163608	0.0570820332505511	-2.67391810473279	0.00749707570970028	0.0160398022172857	exocyst complex component 6B	EXOC6B	364573	chr2
ENSG00000116096	156.429705373589	-0.305124663444285	0.142040714189821	-2.14814931890952	0.0317018953515836	0.058098016801744	sepiapterin reductase (7,8-dihydrobiopterin:NADP+ oxidoreductase)	SPR	4778	chr2
ENSG00000144040	14606.0793893311	-0.0498097218666299	0.0489086123429504	-1.01842435269602	0.308476333892934	0.40409793809471	sideroflexin 5	SFXN5	129801	chr2
ENSG00000135631	669.824485590566	-0.125950012586215	0.0807222719056456	-1.5602882527072	0.118691778183407	0.182338080094337	RAB11 family interacting protein 5	RAB11FIP5	16274	chr2
ENSG00000135632	1659.77711645128	0.174304453634772	0.0618185462406949	2.81961424579778	0.0048081411884832	0.0108000027818295	SMYD family member 5	SMYD5	12990	chr2
ENSG00000135617	418.869996168396	-1.06570331807355	0.104156757714674	-10.2317251559704	1.42949853016626e-24	1.96854738593692e-23	protease associated domain containing 1	PRADC1	5223	chr2
ENSG00000135624	9444.56261142956	-0.0361601007241712	0.049499951361815	-0.730507803126159	0.465079845031044	0.561891237893355	chaperonin containing TCP1 subunit 7	CCT7	18787	chr2
ENSG00000163013	200.584703596465	0.114936460837079	0.124101376671651	0.92614976497142	0.354368154798802	0.451832302253936	F-box protein 41	FBXO41	15039	chr2
ENSG00000135625	17.158830325351	3.05923336446389	0.344993593345467	8.8675077551381	7.48011684479902e-19	7.90634237067248e-18	early growth response 4	EGR4	2343	chr2
ENSG00000116127	5462.66084003939	-0.32826785311241	0.0567608945617201	-5.78334530572738	7.32295287088591e-09	3.74572516277418e-08	ALMS1, centrosome and basal body associated protein	ALMS1	37580	chr2
ENSG00000163016	33.0059453160612	0.590669594840598	0.254131377514798	2.32426865433492	0.0201110997159996	0.0388383827251206	ALMS1, centrosome and basal body associated protein pseudogene 1	ALMS1P1	40649	chr2
ENSG00000144034	566.663722904105	-0.0223005680082238	0.0837165414110265	-0.266381859932959	0.789945134354056	0.840986819203995	TP53RK binding protein	TPRKB	4762	chr2
ENSG00000144048	420.114578375841	-0.004833080318027	0.0924628065687908	-0.0522705344708661	0.958313131295988	0.970298973669774	dual specificity phosphatase 11	DUSP11	12739	chr2
ENSG00000124356	2105.72883440655	0.264209439760669	0.0512604269477776	5.15425749437938	2.54637849234053e-07	1.11096669112863e-06	STAM binding protein	STAMBP	38253	chr2
ENSG00000163017	13.5135329586077	0.00976774161846073	0.321981876571307	0.0303363087465501	0.975798839697171	0.982782579408829	actin, gamma 2, smooth muscle, enteric	ACTG2	26688	chr2
ENSG00000114956	1202.66223447768	0.243483923117208	0.0623738354582426	3.90362275028305	9.47634532508319e-05	0.00029245530250725	deoxyguanosine kinase	DGUOK	32136	chr2
ENSG00000187605	1364.05739380854	-0.170956568390991	0.0896463213334911	-1.90701152984314	0.0565190944560402	0.0959919861577545	tet methylcytosine dioxygenase 3	TET3	61898	chr2
ENSG00000163170	489.342483040472	0.338374247153175	0.0867916266336514	3.89869691671361	9.67117349250157e-05	0.000297877248213073	bolA family member 3	BOLA3	12512	chr2
ENSG00000225439	152.907659338321	-0.564724874508347	0.155515805986311	-3.63130211059096	0.000281994842664918	0.000805658460122843	BOLA3 antisense RNA 1 (head to head)	BOLA3-AS1	4409	chr2
ENSG00000114978	5490.71601949652	0.333858770214271	0.0450186325215104	7.41601313755477	1.20698532355376e-13	9.25223287157655e-13	MOB kinase activator 1A	MOB1A	22785	chr2
ENSG00000065911	723.545692573947	-0.204845405556786	0.0837705882871876	-2.44531415793001	0.0144726014485066	0.0290052637788115	methylenetetrahydrofolate dehydrogenase (NADP+ dependent) 2, methenyltetrahydrofolate cyclohydrolase	MTHFD2	16735	chr2
ENSG00000188687	15.460751339047	0.306284220544232	0.318538603485339	0.961529363138334	0.336286068839058	0.433194112775112	solute carrier family 4 member 5	SLC4A5	93592	chr2
ENSG00000204843	5115.88176912446	-0.141642949446947	0.0400012522680104	-3.54096288031015	0.000398669661500153	0.0011093519986707	dynactin subunit 1	DCTN1	19202	chr2
ENSG00000005448	329.327824677689	-0.500363441083654	0.112235716732598	-4.45814804458165	8.26707994583894e-06	2.9702528127623e-05	WD repeat domain 54	WDR54	3998	chr2
ENSG00000114993	1553.74720486862	0.528632660556709	0.0595883425375398	8.87141071634403	7.2225043000743e-19	7.64559128666218e-18	rhotekin	RTKN	16073	chr2
ENSG00000239779	176.066558057246	-0.225040597271153	0.154628562183237	-1.45536241231084	0.145568956550348	0.216284026786295	WW domain binding protein 1	WBP1	2433	chr2
ENSG00000115275	1854.79917466381	0.0627976136042353	0.0653289016241076	0.961253167328039	0.336424889395246	0.433293229352623	mannosyl-oligosaccharide glucosidase	MOGS	2590	chr2
ENSG00000204822	42.1652884565275	0.127037514419761	0.239839859137159	0.529676405234673	0.596336309746233	0.681817074338718	mitochondrial ribosomal protein L53	MRPL53	858	chr2
ENSG00000135637	256.325114489577	0.203354949267161	0.130024582866845	1.56397309480632	0.117823887040574	0.181193645067527	coiled-coil domain containing 142	CCDC142	10399	chr2
ENSG00000115282	503.200496640646	-0.275856368988309	0.0909770780259891	-3.03215243854618	0.00242816546230802	0.00582003376683618	tetratricopeptide repeat domain 31	TTC31	11492	chr2
ENSG00000115289	414.562674501157	0.108572002124987	0.0956224907856651	1.13542327995145	0.256198010135138	0.346337174897936	polycomb group ring finger 1	PCGF1	2652	chr2
ENSG00000115307	2592.8972848196	0.221375505943798	0.0537761376385219	4.11661223109519	3.84482145815352e-05	0.000125839505775742	ancient ubiquitous protein 1	AUP1	1294	chr2
ENSG00000115317	1008.63336485935	-0.107030934504814	0.0710044346808276	-1.50738379913775	0.131712308998722	0.198882036391062	HtrA serine peptidase 2	HTRA2	4152	chr2
ENSG00000115318	893.835690071709	0.392392733300359	0.0772318182173069	5.08071339452717	3.76020070028307e-07	1.60651649809226e-06	lysyl oxidase like 3	LOXL3	20208	chr2
ENSG00000115325	754.883588212801	0.471292787686652	0.085084536505963	5.53911212354812	3.0400896867615e-08	1.46260584208502e-07	docking protein 1	DOK1	3167	chr2
ENSG00000135622	319.61900780493	-0.00203050814932952	0.105914739593727	-0.0191711574528554	0.984704566391527	0.989438043644234	ssemaphorin 4F	SEMA4F	29627	chr2
ENSG00000159399	286.324369350332	0.258322724287066	0.115777071831485	2.23120796026918	0.0256673569363156	0.0482447099574688	hexokinase 2	HK2	60700	chr2
ENSG00000115350	504.674882004998	0.142602030532546	0.0947069400767207	1.50571890948041	0.132139347608754	0.19944084095922	DNA polymerase epsilon 4, accessory subunit	POLE4	11085	chr2
ENSG00000115363	15.7315967549309	0.775349832802311	0.312733873813452	2.47926399320853	0.0131653823976669	0.0266485302036891	eva-1 homolog A, regulator of programmed cell death	EVA1A	77405	chr2
ENSG00000115364	3056.81646570304	0.0350861059481278	0.0465481264145652	0.753759789076045	0.450993473285215	0.547945136927166	mitochondrial ribosomal protein L19	MRPL19	15426	chr2
ENSG00000005436	787.271342003864	0.183536144134765	0.0759001407705929	2.41812653140526	0.0156006509130716	0.0309778982046743	GC-rich sequence DNA-binding factor 2	GCFC2	9203	chr2
ENSG00000176204	2256.68079718094	-0.185264367982221	0.0611036062408624	-3.03197109597645	0.00242962467533999	0.00582253483541009	leucine rich repeat transmembrane neuronal 4	LRRTM4	5716	chr2
ENSG00000066032	1360.98813064058	-0.734830124229346	0.0655612621820369	-11.2082973965483	3.71266191109191e-29	6.03900465329178e-28	catenin alpha 2	CTNNA2	997311	chr2
ENSG00000162951	21.1719660183346	-0.239999041040098	0.293802804182712	-0.816871172171814	0.414002053707741	0.51233531520517	leucine rich repeat transmembrane neuronal 1	LRRTM1	2485	chr2
ENSG00000163541	2283.9015874096	-0.234610808237525	0.0496414617259921	-4.72610596224011	2.28866253585272e-06	8.94827437594009e-06	succinate-CoA ligase alpha subunit	SUCLG1	35940	chr2
ENSG00000115423	354.70900717556	-0.0365093223054102	0.100392400706063	-0.363666194339801	0.716107290275074	0.782849317016815	dynein axonemal heavy chain 6	DNAH6	79636	chr2
ENSG00000034510	7197.6769904122	1.25454057620056	0.0601927375960084	20.8420587981988	1.79931876216642e-96	8.5712446476669e-95	thymosin beta 10	TMSB10	1037	chr2
ENSG00000176407	2086.71980831753	0.0051968363829599	0.0520801482806624	0.0997853607281205	0.92051473048493	0.942797191783052	potassium channel modulatory factor 1	KCMF1	88365	chr2
ENSG00000152284	56.1662569218725	-0.0357775209688539	0.216835195096538	-0.164998680001765	0.868945021022824	0.903390618322667	transcription factor 7 like 1	TCF7L1	176929	chr2
ENSG00000152291	1950.50973357624	-0.00582239621166246	0.169730589117491	-0.034303753035536	0.972634932142983	0.980405370999171	trans-golgi network protein 2	TGOLN2	10279	chr2
ENSG00000042445	2370.88924046104	-0.0647189322520158	0.0527271161288282	-1.22743167090512	0.219660388864935	0.305283690190871	retinol saturase	RETSAT	9067	chr2
ENSG00000115459	570.575794955779	0.0350117637894706	0.0813478847828428	0.430395503004585	0.666907966017521	0.741214670587683	ELMO domain containing 3	ELMOD3	37033	chr2
ENSG00000042493	224.472879499763	0.111794013379172	0.119720926233443	0.933788410233186	0.350413049075152	0.44789036709843	capping actin protein, gelsolin like	CAPG	15950	chr2
ENSG00000152292	9.74140378113461	0.516731198992199	0.337473332428006	1.53117639036689	0.125725804181302	0.19139020516947	SH2 domain containing 6	SH2D6	18099	chr2
ENSG00000168906	3973.56600339909	0.258048766734503	0.0561427983174571	4.59629328191617	4.30073237967612e-06	1.61522544857506e-05	methionine adenosyltransferase 2A	MAT2A	4675	chr2
ENSG00000115486	1725.4251627295	0.11036090131371	0.0525529438860492	2.09999465592272	0.0357293112317434	0.0644716219397234	gamma-glutamyl carboxylase	GGCX	13808	chr2
ENSG00000118640	16.3957782592714	0.401538903926688	0.303133321893867	1.32462805942289	0.185294544592931	0.264612021721628	vesicle associated membrane protein 8	VAMP8	4543	chr2
ENSG00000168899	347.295562148745	2.57894049329835	0.119571767421859	21.5681389420267	3.57801825016369e-103	1.83553646862793e-101	vesicle associated membrane protein 5	VAMP5	8981	chr2
ENSG00000168894	1184.49266090931	0.526231740288739	0.0692467097946793	7.59937536164603	2.97563515921094e-14	2.40056281133348e-13	ring finger protein 181	RNF181	1995	chr2
ENSG00000168890	305.247872139174	0.0677092428666787	0.106662003156352	0.634801905674189	0.525557620263896	0.619408774871317	transmembrane protein 150A	TMEM150A	4153	chr2
ENSG00000168883	2002.08267731862	0.0302772752554269	0.0531915939888287	0.569211655168404	0.569212511988489	0.657903873103804	ubiquitin specific peptidase 39	USP39	33193	chr2
ENSG00000168887	937.593364852172	-0.0857238712985614	0.0672410737253177	-1.27487362335626	0.202353976418655	0.285365767771953	chromosome 2 open reading frame 68	C2orf68	6804	chr2
ENSG00000168874	557.56208801209	-0.00916666559906844	0.109010260658349	-0.0840899337705272	0.932984927984838	0.951949141514473	atonal bHLH transcription factor 8	ATOH8	21428	chr2
ENSG00000115525	2275.12051034303	0.0120564035574912	0.0551291227200728	0.218693912811013	0.826888491089167	0.870327169525311	ST3 beta-galactoside alpha-2,3-sialyltransferase 5	ST3GAL5	22145	chr2
ENSG00000068654	3102.28237583254	-0.10166481722895	0.0731065939232955	-1.39063813225409	0.164335187021378	0.239412120674824	RNA polymerase I subunit A	POLR1A	10750	chr2
ENSG00000132300	7961.92810595189	0.00326942519992019	0.0458568824677271	0.0712962814735853	0.943161954654361	0.959397383420564	pentatricopeptide repeat domain 3	PTCD3	35976	chr2
ENSG00000208772	68.8040965641079	0.445566586511284	0.199592185041036	2.23238493240442	0.0255895327998221	0.0481178043584196	small nucleolar RNA, C/D box 94	SNORD94	137	chr2
ENSG00000132305	3656.54486889889	-0.109772500299856	0.0452992073519481	-2.4232764040878	0.015381218671331	0.0306159703655472	inner membrane mitochondrial protein	IMMT	51839	chr2
ENSG00000132313	3238.07021048601	-0.0634165868220712	0.0538157994936129	-1.17840090491637	0.238636817136008	0.327144540327897	mitochondrial ribosomal protein L35	MRPL35	13922	chr2
ENSG00000068615	583.103721749266	-1.06402446449717	0.0899084333432712	-11.8345345918187	2.5877490042164e-32	4.68235462584633e-31	receptor accessory protein 1	REEP1	124087	chr2
ENSG00000115548	1671.4191782034	-0.087492179491295	0.0594295898674415	-1.47219894477561	0.140967162296217	0.21051877883968	lysine demethylase 3A	KDM3A	51569	chr2
ENSG00000115561	2424.03140194553	-0.228718747435499	0.0518284131876057	-4.41299922896723	1.01948359708492e-05	3.62198573748716e-05	charged multivesicular body protein 3	CHMP3	60068	chr2
ENSG00000239305	1055.24245767763	-0.0994312362010829	0.068059921584167	-1.46093668471422	0.144032817972298	0.21425168515157	ring finger protein 103	RNF103	11306	chr2
ENSG00000153561	3315.37574759667	-0.242663356654231	0.0475726529481798	-5.10090023607808	3.3804172246749e-07	1.45580391240996e-06	required for meiotic nuclear division 5 homolog A	RMND5A	1091355	chr2
ENSG00000222041	256.536208677892	0.931201344182156	0.137651686013955	6.76491055901598	1.33391577928323e-11	8.66890509923976e-11	cytoskeleton regulator RNA	CYTOR	66057	chr2
ENSG00000172086	1037.56262465422	0.0522868559411392	0.069001919324317	0.757759442826292	0.448595006106201	0.545930922881243	lysine rich coiled-coil 1	KRCC1	28525	chr2
ENSG00000144115	480.28549933104	0.239127924027701	0.0954729196267821	2.50466755350615	0.0122566536584415	0.0249751832513419	threonine synthase like 2	THNSL2	16343	chr2
ENSG00000172071	1752.18064889896	-0.12121828736432	0.0529605031862364	-2.28884319580676	0.0220884646887875	0.0422607852413209	eukaryotic translation initiation factor 2 alpha kinase 3	EIF2AK3	70836	chr2
ENSG00000153574	234.79405456848	-0.121304013085009	0.124051582579196	-0.977851395064365	0.32814782741024	0.424820699101536	ribose 5-phosphate isomerase A	RPIA	59277	chr2
ENSG00000283196	111.663469614648	-0.0643550596449845	0.171378285892277	-0.375514665174303	0.707277741872068	0.775436415760005	lymphocyte-specific protein 1 pseudogene	LOC645166	23310	chr1
ENSG00000143429	48.839924774119	0.0377202312416404	0.218818860201357	0.172381079066632	0.863137946231904	0.89928931237746	lymphocyte-specific protein 1 pseudogene	LOC645166	23310	chr1
ENSG00000144029	1339.82617611145	-0.0231976258117408	0.0621306645220448	-0.373368384036999	0.708874286833935	0.776882728469306	mitochondrial ribosomal protein S5	MRPS5	34803	chr2
ENSG00000144026	622.510085698426	-0.298643800604402	0.0811540324675354	-3.67996255421898	0.000233268205011368	0.000677503361921239	zinc finger protein 514	ZNF514	11864	chr2
ENSG00000275111	439.872454757081	0.0185497806280731	0.0910374110637607	0.203759975281823	0.838541071709101	0.879880700478456	zinc finger protein 2	ZNF2	18882	chr2
ENSG00000155066	26.1198689972921	-0.425593291166149	0.275494362982393	-1.54483484365649	0.122386216867571	0.187119974588464	prominin 2	PROM2	11463	chr2
ENSG00000115041	340.685448403177	-0.239151493090788	0.111580444601645	-2.1433100929521	0.0320882069290745	0.0587061186207301	potassium voltage-gated channel interacting protein 3	KCNIP3	16573	chr2
ENSG00000115042	1044.94207411316	-0.235651934590287	0.067924740110439	-3.46930932981326	0.000521798297745763	0.00142009039252418	fumarylacetoacetate hydrolase domain containing 2A	FAHD2A	10432	chr2
ENSG00000231584	154.065910146823	-0.469040106463276	0.147032674729607	-3.19003995081936	0.00142253127276011	0.00356779199050954	fumarylacetoacetate hydrolase domain containing 2C, pseudogene	FAHD2CP	12586	chr2
ENSG00000158050	21.6412009441414	-0.373073886137762	0.281505714746124	-1.32527997335407	0.185078308759445	0.264357135561042	dual specificity phosphatase 2	DUSP2	2272	chr2
ENSG00000084090	10844.7828341148	-0.100052260141906	0.0394401946311765	-2.53680949289275	0.011186781196955	0.0230330594918194	StAR related lipid transfer domain containing 7	STARD7	10685	chr2
ENSG00000135956	1847.71104040175	0.0225910093820848	0.078152870608913	0.289061799087754	0.772534086186298	0.827799531525563	transmembrane protein 127	TMEM127	15806	chr2
ENSG00000144021	3397.29782816961	-0.00140338619894808	0.0509605957144299	-0.0275386537239929	0.978030110314904	0.984282087618154	cytosolic iron-sulfur assembly component 1	CIAO1	8017	chr2
ENSG00000144028	6203.14589186724	-0.181688473073456	0.0422112096985013	-4.3042706989728	1.67536712685047e-05	5.77350310323347e-05	small nuclear ribonucleoprotein U5 subunit 200	SNRNP200	10388	chr2
ENSG00000198885	403.305509993786	-0.475464673544397	0.107975438300956	-4.40345212787331	1.06541802299818e-05	3.76797459901251e-05	inositol 1,4,5-trisphosphate receptor interacting protein-like 1	ITPRIPL1	3030	chr2
ENSG00000121152	1206.40054019012	-0.582562737360971	0.0633794345811161	-9.1916682629186	3.86795331073005e-20	4.35455676179859e-19	non-SMC condensin I complex subunit H	NCAPH	30313	chr2
ENSG00000163121	34.5077537718587	3.57621376974545	0.316711816550914	11.2916966872013	1.44225348582101e-29	2.35966823235085e-28	neuralized E3 ubiquitin protein ligase 3	NEURL3	10464	chr2
ENSG00000196843	338.627794922069	0.772605341103725	0.10617540418649	7.2766884856562	3.42114004517742e-13	2.51512159226823e-12	AT-rich interaction domain 5A	ARID5A	14756	chr2
ENSG00000114982	2538.74613647795	0.251202485903548	0.0487161183356546	5.1564552859643	2.51668545092915e-07	1.09903896913822e-06	KAT8 regulatory NSL complex subunit 3	KANSL3	5859	chr2
ENSG00000114988	1424.26827977847	0.204380473910141	0.0571948574984531	3.57340647130154	0.00035236713831597	0.000989156498720215	lectin, mannose binding 2 like	LMAN2L	34147	chr2
ENSG00000158158	303.279012567571	-0.100351782609573	0.105169052074337	-0.954194990163463	0.339984950098633	0.436994238815286	cyclin and CBS domain divalent metal cation transport mediator 4	CNNM4	21200	chr2
ENSG00000168763	690.309775438223	-0.220173517523469	0.0761077687848395	-2.89291778012716	0.00381681197188552	0.00874152929946961	cyclin and CBS domain divalent metal cation transport mediator 3	CNNM3	19131	chr2
ENSG00000163126	19.013338068697	-0.220205254109413	0.295437500218442	-0.745353091420676	0.456058293576641	0.552993809183291	ankyrin repeat domain 23	ANKRD23	6108	chr2
ENSG00000213337	74.9946686048618	-0.224498109735779	0.192495625701882	-1.16625044811906	0.243513201175683	0.332559959284782	ankyrin repeat domain 39	ANKRD39	10033	chr2
ENSG00000168758	1409.87490105042	-0.103805040703407	0.0663119056577356	-1.56540578458399	0.117487792944119	0.180834876380085	semaphorin 4C	SEMA4C	7195	chr2
ENSG00000144199	199.879633187356	-0.491786340053798	0.13318395040382	-3.69253456263069	0.000222030154381354	0.00064660684385753	fumarylacetoacetate hydrolase domain containing 2B	FAHD2B	11260	chr2
ENSG00000135976	501.917496291431	-0.182529174959059	0.0852817739576063	-2.14030696699384	0.032329967320388	0.0591021005511074	ankyrin repeat domain 36	ANKRD36	7252	chr2
ENSG00000196912	236.087478116601	-0.362623707122536	0.134043854461097	-2.70526171140341	0.00682505950457386	0.0147212318437636	ankyrin repeat domain 36B	ANKRD36B	6908	chr2
ENSG00000135940	2137.15920218006	0.118164094544151	0.0691492223867951	1.70882752496021	0.0874829025426024	0.140439941553089	cytochrome c oxidase subunit 5B	COX5B	2137	chr2
ENSG00000115073	2838.60565132331	-0.276880725440519	0.0604425322279214	-4.58089221669991	4.62996428060915e-06	1.72867634630582e-05	ARP1 actin-related protein 1 homolog B, centractin beta	ACTR1B	8160	chr2
ENSG00000228486	29.4064039896065	-0.0249101213868012	0.256970533239949	-0.0969376569084714	0.922775903725904	0.944353418464106	long intergenic non-protein coding RNA 1125	LINC01125	33324	chr2
ENSG00000075568	1924.05404178143	-0.236038723923383	0.0841580472180659	-2.80470771038415	0.00503622266923158	0.0112599454793404	transmembrane protein 131	TMEM131	181657	chr2
ENSG00000144191	118.904044935729	0.130259784770698	0.160657850074946	0.81079004051114	0.417486254904808	0.51587215457401	cyclic nucleotide gated channel alpha 3	CNGA3	52447	chr2
ENSG00000040933	2507.68278176807	0.233598948717706	0.0522179909582126	4.47353382294319	7.69373816041124e-06	2.77851477402165e-05	inositol polyphosphate-4-phosphatase type I A	INPP4A	136964	chr2
ENSG00000183513	1825.05195116723	-0.042820661670123	0.0606604597252161	-0.705907305419296	0.480245784173153	0.576632562358112	cytochrome c oxidase assembly factor 5	COA5	9196	chr2
ENSG00000115446	1806.46453615112	0.109572145134841	0.0544092163635905	2.01385266059749	0.0440250049616161	0.0774196627935	unc-50 inner nuclear membrane RNA binding protein	UNC50	9936	chr2
ENSG00000071073	2049.76792378929	0.746775712850106	0.0575022241068471	12.9869013668496	1.45187188513548e-38	3.10909262252636e-37	mannosyl (alpha-1,3-)-glycoprotein beta-1,4-N-acetylglucosaminyltransferase, isozyme A	MGAT4A	44368	chr2
ENSG00000196872	377.442938816158	0.771343539657293	0.095948362473786	8.03915272517581	9.04617750726524e-16	8.05414596244435e-15	KIAA1211 like	KIAA1211L	142376	chr2
ENSG00000135951	205.183801156482	-0.0780245648618218	0.128565281326545	-0.606886743114153	0.543926076493011	0.636019184003121	testis specific 10	TSGA10	144314	chr2
ENSG00000241962	13.6661896546569	0.390902117213742	0.31917851480533	1.2247131278625	0.220683326097415	0.306462070599335	mitochondrial ribosomal protein L30	MRPL30	18479	chr2
ENSG00000144182	195.142754048357	0.281858097055078	0.13981745422337	2.01590065146507	0.0438103654910449	0.0771002976504252	lipoyltransferase 1	LIPT1	8196	chr2
ENSG00000158411	712.014062305541	0.32273547427924	0.0776000084515596	4.15896184445265	3.19697291436097e-05	0.000106023219667595	microtubule interacting and trafficking domain containing 1	MITD1	11767	chr2
ENSG00000185414	1588.54914285078	-0.302450906680167	0.0603474738019643	-5.01182382004403	5.39165576166749e-07	2.26485119802499e-06	mitochondrial ribosomal protein L30	MRPL30	18479	chr2
ENSG00000144214	30.2180019923698	0.210783104859976	0.261078102394908	0.807356507215395	0.419461116944909	0.517718598996515	lysozyme g1	LYG1	16939	chr2
ENSG00000115514	1370.97856318288	0.164055641242225	0.0701697261601891	2.33798320471859	0.0193881194207081	0.0375820916937047	thioredoxin domain containing 9	TXNDC9	34078	chr2
ENSG00000158417	1652.85827403707	-0.456176149488211	0.270353642976045	-1.68733124683151	0.0915396759053944	0.145998537872116	eukaryotic translation initiation factor 5B	EIF5B	62895	chr2
ENSG00000135945	1890.277852044	-0.121375959544474	0.0523802226824531	-2.31720968962459	0.0204923119555313	0.0395037617257006	REV1, DNA directed polymerase	REV1	24215	chr2
ENSG00000144218	227.278818771175	-0.18480027189741	0.123063396381526	-1.50166724900461	0.133183066156443	0.200648541471706	AF4/FMR2 family member 3	AFF3	595322	chr2
ENSG00000170500	762.199638704831	-1.03330028438052	0.0809755570578041	-12.7606443465762	2.71942258024284e-37	5.63395166217469e-36	LON peptidase N-terminal domain and ring finger 2	LONRF2	35935	chr2
ENSG00000115526	2305.42843240941	-0.0521786210094759	0.0582682757806965	-0.895489360382996	0.370525550830496	0.468243363571464	carbohydrate sulfotransferase 10	CHST10	25809	chr2
ENSG00000115539	504.044556928761	-0.0932256480907324	0.0926703157061789	-1.00599255954101	0.314419149218244	0.410347608312507	phosducin like 3	PDCL3	13784	chr2
ENSG00000071082	12961.8781124231	-0.0894438834485516	0.049616271305591	-1.8027127209471	0.071433343321799	0.117877220834429	ribosomal protein L31	RPL31	16371	chr2
ENSG00000204634	198.505121088267	0.151529364455502	0.128146041134465	1.18247402037571	0.237017667988844	0.325370754771982	TBC1 domain family member 8	TBC1D8	52312	chr2
ENSG00000158435	886.046675577526	-0.0245526850475251	0.0676665621817081	-0.362848122557086	0.716718341521231	0.783211639591514	CCR4-NOT transcription complex subunit 11	CNOT11	17434	chr2
ENSG00000163162	1398.6612445779	1.1923056167544	0.0620134105993451	19.2265770456914	2.21792740631484e-82	9.49910499248908e-81	ring finger protein 149	RNF149	33116	chr2
ENSG00000071054	14406.6512295117	2.11054258676399e-05	0.0491398166344118	0.000429497448569235	0.999657310627418	0.999800088219452	mitogen-activated protein kinase kinase kinase kinase 4	MAP4K4	97457	chr2
ENSG00000115594	141.821552314632	1.53522969256697	0.162076040250668	9.4722803579886	2.73800009253669e-21	3.28865276980929e-20	interleukin 1 receptor type 1	IL1R1	37089	chr2
ENSG00000135953	332.02399682194	0.240435466416035	0.109904675596057	2.18767277290122	0.0286934467103253	0.0532042527708335	major facilitator superfamily domain containing 9	MFSD9	19672	chr2
ENSG00000170417	142.839676172978	-0.0286189647259563	0.143483321269893	-0.199458476934221	0.841904121313343	0.882136424950076	transmembrane protein 182	TMEM182	19914	chr2
ENSG00000235597	367.980374705257	-0.142818496526534	0.0994708926186549	-1.43578179271058	0.151064442307679	0.223005957048491	long intergenic non-protein coding RNA 1102	LINC01102	78411	chr2
ENSG00000234177	1202.56371162087	0.379518784711661	0.0654534041351795	5.79830475933458	6.69886324555524e-09	3.43906084142233e-08	long intergenic non-protein coding RNA 1114	LINC01114	11083	chr2
ENSG00000233639	2322.51840653461	0.170043068322318	0.0538054523437865	3.16033154476314	0.00157589703008928	0.00391319821035468	long intergenic non-protein coding RNA 1158	LINC01158	46052	chr2
ENSG00000198914	6839.75443603595	-0.111550222905298	0.0518952810434811	-2.1495253645863	0.0315927776440285	0.057905621110407	POU class 3 homeobox 3	POU3F3	1503	chr2
ENSG00000135972	943.754480829961	0.096898263935675	0.0719429621517823	1.3468762063375	0.178020105852668	0.255998724968335	mitochondrial ribosomal protein S9	MRPS9	61936	chr2
ENSG00000135973	16.0622066905125	1.72121639583039	0.320851709297054	5.36452306768558	8.11633873081803e-08	3.73175718729831e-07	G protein-coupled receptor 45	GPR45	1725	chr2
ENSG00000135966	1783.26094541252	-0.0276244723532784	0.0521950883613259	-0.529254250170918	0.596629087725428	0.681938331314341	transforming growth factor beta receptor associated protein 1	TGFBRAP1	62609	chr2
ENSG00000135974	2063.11946398719	0.0896217184419808	0.0504265086058404	1.77727391643372	0.0755231830343117	0.123635555627766	chromosome 2 open reading frame 49	C2orf49	7972	chr2
ENSG00000115641	245.158576911903	0.466063372692522	0.124397770437035	3.74655728197657	0.000179278079761054	0.000530373786872321	four and a half LIM domains 2	FHL2	38293	chr2
ENSG00000071051	3774.39284452478	0.366670226817911	0.0525737504892208	6.97439736381541	3.07184707021487e-12	2.09962021563491e-11	NCK adaptor protein 2	NCK2	149211	chr2
ENSG00000119147	11.7404397068959	0.197261613446387	0.334735598787907	0.589305751048529	0.555656187631364	0.646127939868586	chromosome 2 open reading frame 40	C2orf40	12497	chr2
ENSG00000115652	991.066267560875	0.0659025940859921	0.0744602154203501	0.885071225136165	0.37611821780519	0.473528914092204	UDP-glucuronate decarboxylase 1	UXS1	101037	chr2
ENSG00000144057	2725.82288489058	-0.977482058856882	0.0624967610346538	-15.6405234875273	3.85545550334457e-55	1.16119686719012e-53	ST6 beta-galactoside alpha-2,6-sialyltransferase 2	ST6GAL2	84555	chr2
ENSG00000198075	203.573606916616	-0.0280131411545954	0.169899929964193	-0.164880239565133	0.869038246059906	0.903420474767591	sulfotransferase family 1C member 4	SULT1C4	8408	chr2
ENSG00000135968	1403.49572310358	0.139094119265753	0.0638927448077745	2.17699395579618	0.0294810184126275	0.0544770633155889	GRIP and coiled-coil domain containing 2	GCC2	60278	chr2
ENSG00000169756	1989.39878209315	-0.0865366719350406	0.0663379575111689	-1.30448200670741	0.192069290528208	0.272840086605899	LIM zinc finger domain containing 1	LIMS1	32435	chr2
ENSG00000153201	6731.40345066146	-0.1682368847175	0.0587770157223884	-2.86229034682716	0.00420591416080393	0.00955610444874417	RAN binding protein 2	RANBP2	66331	chr2
ENSG00000163006	505.832906595972	-0.469014673494423	0.0926985880622671	-5.05956652952878	4.20210646012812e-07	1.78713941615835e-06	coiled-coil domain containing 138	CCDC138	89629	chr2
ENSG00000172985	714.26032552571	-0.0132951351325821	0.0900831339445106	-0.147587395669112	0.882668402957893	0.913791468319433	SH3 domain containing ring finger 3	SH3RF3	516211	chr2
ENSG00000186522	2959.4032973169	-0.30644848285474	0.0482565501217801	-6.35040180206392	2.1475326101216e-10	1.26105636078629e-09	septin 10	SEPT10	3762	chr2
ENSG00000198142	1963.65011280835	-0.0189423282173531	0.052833885347498	-0.358526125662839	0.719949620117147	0.785945469618883	sosondowah ankyrin repeat domain family member C	SOWAHC	4654	chr2
ENSG00000204588	13.0224864293957	0.268726531786747	0.318557638113427	0.843572715374864	0.39890821633025	0.497170914808682	long intergenic non-protein coding RNA 1123	LINC01123	8302	chr2
ENSG00000144061	257.102365592407	0.232534076567819	0.120636616376264	1.9275580130874	0.0539101256150329	0.0921833899333952	nephrocystin 1	NPHP1	81726	chr2
ENSG00000169679	2992.97723894109	-0.401246633044972	0.0489176883104823	-8.20248558145769	2.3546698887967e-16	2.16243618312117e-15	BUB1 mitotic checkpoint serine/threonine kinase	BUB1	40276	chr2
ENSG00000153094	444.497582807095	-0.167852827825142	0.0887130124256998	-1.89208801770455	0.0584792545381785	0.0987582249857941	BCL2 like 11	BCL2L11	47532	chr2
ENSG00000172965	517.39340276296	0.881153242116309	0.121326078031516	7.26268627827415	3.79477379892254e-13	2.78250298711571e-12	MIR4435-2 host gene	MIR4435-2HG	128102	chr2
ENSG00000153107	1968.53494055134	-0.263576027397801	0.0575479718224352	-4.58010975975082	4.6473197672317e-06	1.73423163709246e-05	anaphase promoting complex subunit 1	ANAPC1	116528	chr2
ENSG00000153208	874.4909289219	0.167555720423504	0.0703000671496711	2.38343613622406	0.0171518602335062	0.0337186696477056	MER proto-oncogene, tyrosine kinase	MERTK	130755	chr2
ENSG00000153214	539.269035627763	0.339969572738886	0.0879088833550003	3.8672948599062	0.000110049334723895	0.00033666250170558	transmembrane protein 87B	TMEM87B	26296	chr2
ENSG00000144152	247.656021259616	-0.376798461644028	0.117386002836684	-3.2099096360599	0.00132776706414047	0.00334690023997251	fibulin 7	FBLN7	49830	chr2
ENSG00000144161	276.1104653422	-0.21062126436704	0.116037879939489	-1.81510782924398	0.0695073402591015	0.115078649997484	zinc finger CCCH-type containing 8	ZC3H8	39226	chr2
ENSG00000188177	931.126487731575	-0.389237986997459	0.0751965475353525	-5.17627470615543	2.26360096119416e-07	9.94096314252875e-07	zinc finger CCCH-type containing 6	ZC3H6	64463	chr2
ENSG00000169629	136.154494441302	-0.131247903364054	0.147430972832077	-0.890232905900612	0.373340839094065	0.470921233136303	RANBP2-like and GRIP domain containing 8	RGPD8	65277	chr2
ENSG00000114999	5319.7908003591	-0.276470917792802	0.0398644147370908	-6.93528099223709	4.05414514874115e-12	2.73630374978891e-11	tubulin tyrosine ligase	TTL	50480	chr2
ENSG00000125630	1874.32872983465	0.31668076162983	0.0587658548141758	5.38885654996783	7.09073732818541e-08	3.28392117332132e-07	RNA polymerase I subunit B	POLR1B	35236	chr2
ENSG00000125611	391.271375659847	0.143039374356335	0.105765621578449	1.35241841556463	0.176241501534992	0.25377978912169	coiled-coil-helix-coiled-coil-helix domain containing 5	CHCHD5	4815	chr2
ENSG00000144136	4741.57304906904	-0.298376809943331	0.0464108503775997	-6.42903130444133	1.284196812565e-10	7.65326653615866e-10	solute carrier family 20 member 1	SLC20A1	4185	chr2
ENSG00000169607	751.445911743568	-0.319846132098463	0.07268176309487	-4.40063804837776	1.07933034476754e-05	3.81428752926304e-05	cytoskeleton associated protein 2 like	CKAP2L	26811	chr2
ENSG00000125637	256.246122769138	-0.418264168808885	0.12335055567087	-3.39085759714708	0.00069674293182931	0.0018498359735108	pleckstrin and Sec7 domain containing 4	PSD4	29118	chr2
ENSG00000136682	531.97889729722	0.0887889186735981	0.0847129620423241	1.04811491102433	0.294585667127224	0.388847527626463	COBW domain containing 2	CBWD2	58514	chr2
ENSG00000146556	127.584612528541	-0.321029732808989	0.149809982010405	-2.14291283198133	0.0321200984037501	0.0587437775028587	WAS protein family homolog 2 pseudogene	WASH2P	2913	chr2
ENSG00000144134	100.174800383701	-0.124943176693948	0.17384449038777	-0.718706565938647	0.472321736882714	0.569319899561343	RAB, member of RAS oncogene family-like 2A	RABL2A	5340	chr2
ENSG00000115084	3395.49305602434	-0.134761437452371	0.0473456757248954	-2.84633042805028	0.00442262770035265	0.0100079012673193	solute carrier family 35 member F5	SLC35F5	14810	chr2
ENSG00000115091	12402.7030141828	0.163306748278055	0.0424415112411807	3.84780709975285	0.000119179833848676	0.000363324678504724	ARP3 actin related protein 3 homolog	ACTR3	70955	chr2
ENSG00000175497	4792.43030610374	-0.36416002136586	0.0433518953987173	-8.40009457525669	4.46119191706599e-17	4.25316492842132e-16	dipeptidyl peptidase like 10	DPP10	1383147	chr2
ENSG00000235026	117.037102786393	-0.562957000432006	0.159961672940604	-3.51932428614346	0.000432647522166196	0.00119346632813425	DPP10 antisense RNA 1	DPP10-AS1	17296	chr2
ENSG00000088205	3294.49502137509	0.085301073249953	0.0512451038127764	1.66457021068002	0.0959985326662677	0.152036576952514	DEAD-box helicase 18	DDX18	17699	chr2
ENSG00000125633	2007.54906743751	-0.0979563096312559	0.0513927673345049	-1.9060329830787	0.0566459265063748	0.0961607516026398	coiled-coil domain containing 93	CCDC93	77746	chr2
ENSG00000125629	430.302582148266	-0.0868799893421677	0.104546786706587	-0.831015395872457	0.405964931983191	0.504081822184998	insulin induced gene 2	INSIG2	21548	chr2
ENSG00000144119	42.8453473887549	0.498634717368581	0.248035191316189	2.01033859236907	0.0443953649579123	0.0779926099141447	complement C1q like 2	C1QL2	2653	chr2
ENSG00000115107	456.910133209558	-0.120771114027392	0.0953567241051758	-1.26651911714359	0.205327289544766	0.288889761912241	STEAP3 metalloreductase	STEAP3	41844	chr2
ENSG00000186132	396.734372190304	-0.292379963547001	0.0964473201272818	-3.03149909361033	0.00243342651047122	0.00583064812303669	chromosome 2 open reading frame 76	C2orf76	64239	chr2
ENSG00000155368	28004.8493181487	-0.419731601467134	0.0443784410673051	-9.45800689191767	3.13868600883074e-21	3.74742519639169e-20	diazepam binding inhibitor, acyl-CoA binding protein	DBI	5619	chr2
ENSG00000171227	97.6360263562648	-0.75960673119006	0.167967165943936	-4.52235249026944	6.11561045433521e-06	2.23626956691814e-05	transmembrane protein 37	TMEM37	6651	chr2
ENSG00000163075	63.9009207255677	-0.688930634873221	0.225015490783164	-3.06170314086113	0.00220081599589706	0.00533629294019015	cilia and flagella associated protein 221	CFAP221	112230	chr2
ENSG00000144120	433.368155439308	0.116619437446828	0.10533854830813	1.10709174675257	0.268254263478324	0.359374493974931	transmembrane protein 177	TMEM177	2952	chr2
ENSG00000088179	3768.20963577912	-0.128618606701965	0.0447843381114566	-2.871955065672	0.00407940967817992	0.00929431145972178	protein tyrosine phosphatase, non-receptor type 4	PTPN4	55123	chr2
ENSG00000115109	3844.05500300203	-0.258277835330399	0.0447615179539417	-5.77008660868381	7.92308009187987e-09	4.03647641639787e-08	erythrocyte membrane protein band 4.1 like 5	EPB41L5	102151	chr2
ENSG00000226479	725.080131652468	0.543160367796016	0.0728662201589494	7.45421357950464	9.04054449245161e-14	7.01844931356901e-13	transmembrane protein 185B	TMEM185B	5938	chr2
ENSG00000144118	1978.20802624949	0.348487461278155	0.0539148902798358	6.46365891629181	1.02201096701032e-10	6.11939443906777e-10	RAS like proto-oncogene B	RALB	41873	chr2
ENSG00000163083	96.2240137903831	-0.558697660521041	0.182643896908231	-3.05894513848309	0.00222117821745149	0.00537831444873202	inhibin beta B subunit	INHBB	5665	chr2
ENSG00000074047	319.300394487963	-0.279142367099887	0.127796077236308	-2.18427962059996	0.0289417073459244	0.0536146544643751	GLI family zinc finger 2	GLI2	191220	chr2
ENSG00000074054	4526.25708283779	-0.192868199370335	0.050906385612148	-3.78868381738557	0.000151447515174124	0.000453306785640864	cytoplasmic linker associated protein 1	CLASP1	268405	chr2
ENSG00000264229	56.4880093319755	0.318871496011481	0.220536851323225	1.44588758793937	0.148208733823399	0.219544249783435	RNA, U4atac small nuclear (U12-dependent splicing)	RNU4ATAC	130	chr2
ENSG00000236859	150.104184809412	0.145765655873739	0.150349131119547	0.969514454711654	0.332288571745051	0.429268651165892	NIFK antisense RNA 1	NIFK-AS1	78907	chr2
ENSG00000155438	1987.56095961931	0.0806736882087846	0.0543093998849916	1.48544613602108	0.137425681932907	0.206131163700371	nucleolar protein interacting with the FHA domain of MKI67	NIFK	9983	chr2
ENSG00000211460	4188.56820555823	-0.099002479760786	0.043733254446779	-2.2637802974683	0.0235876309088337	0.0447803674770525	translin	TSN	12308	chr2
ENSG00000136732	516.623053067759	-0.048205345904709	0.0872766722534442	-0.552327954997239	0.580723681056897	0.667956237943647	glycophorin C (Gerbich blood group)	GYPC	40741	chr2
ENSG00000136717	325.981220785955	0.271062202034515	0.10116840045264	2.67931686990946	0.00737725445571107	0.0157979279284761	bridging integrator 1	BIN1	59305	chr2
ENSG00000163161	1818.17946209688	0.116108450295377	0.0626414728857112	1.85353959520102	0.0638050563756675	0.106697291288504	ERCC excision repair 3, TFIIH core complex helicase subunit	ERCC3	4481	chr2
ENSG00000169967	3551.87071775268	-0.167808473871505	0.0603824170842278	-2.77909500769781	0.00545105792436859	0.0120641276484354	mitogen-activated protein kinase kinase kinase 2	MAP3K2	44561	chr2
ENSG00000163166	2957.85475995423	0.0538496997377974	0.0457594726672382	1.17679895765826	0.239275758759511	0.327667644610047	IWS1, SUPT6H interacting protein	IWS1	21828	chr2
ENSG00000144230	196.101820426788	2.42133538614005	0.144134519561443	16.7991359287659	2.47625040738771e-63	8.69170099134459e-62	G protein-coupled receptor 17	GPR17	6775	chr2
ENSG00000136709	2600.54723893519	0.0654431492369163	0.0517517020785301	1.26456032571857	0.206028982759475	0.289760584810851	WD repeat domain 33	WDR33	48702	chr2
ENSG00000173349	568.0171342342	-0.0942299870057374	0.0860864674139667	-1.09459697716031	0.273693240495911	0.36561177347818	SFT2 domain containing 3	SFT2D3	2811	chr2
ENSG00000144231	2123.02439345119	-0.256652177584161	0.0554729624668104	-4.62661747581476	3.71686081470428e-06	1.40536273514939e-05	RNA polymerase II subunit D	POLR2D	11890	chr2
ENSG00000144233	1533.71015267166	-0.00278742540433142	0.060728863730329	-0.0458995152076151	0.963390340579837	0.974031310989072	AMMECR1 like	AMMECR1L	23228	chr2
ENSG00000136715	865.969732240879	-0.0852100802805138	0.173991000005789	-0.489738436342563	0.624318999609596	0.706267172013925	Sin3A associated protein 130	SAP130	86079	chr2
ENSG00000136731	5292.90651160547	-0.384258867802866	0.0519531971870646	-7.39625063726664	1.40083489619746e-13	1.06855624843385e-12	UDP-glucose glycoprotein glucosyltransferase 1	UGGT1	104496	chr2
ENSG00000136720	1918.40276725202	-0.139497782266101	0.0585195332238586	-2.38378152697273	0.0171357719782189	0.0336917712417458	heparan sulfate 6-O-sulfotransferase 1	HS6ST1	53118	chr2
ENSG00000152076	21.8181249057832	0.315632133554174	0.28491385761046	1.10781601218468	0.267941283397536	0.359058240740837	coiled-coil domain containing 74B	CCDC74B	5751	chr2
ENSG00000136699	1072.10221007791	-0.0690885871385595	0.0672158031627552	-1.02786225690512	0.304014625886502	0.399336413012611	sphingomyelin phosphodiesterase 4	SMPD4	31359	chr2
ENSG00000152082	731.093181741525	-0.197956326520831	0.101630328779471	-1.94780759737952	0.0514379893864616	0.08861963849888	mitotic spindle organizing protein 2B	MZT2B	8800	chr2
ENSG00000136710	911.909304435054	-0.0670767587504217	0.0706687810031017	-0.949171017220144	0.342533639640918	0.439826132132672	coiled-coil domain containing 115	CCDC115	4107	chr2
ENSG00000136718	1461.91438516416	0.171316639497067	0.0590862537600462	2.89943309306421	0.00373838121510834	0.0085815487489907	IMP4 homolog, U3 small nucleolar ribonucleoprotein	IMP4	3709	chr2
ENSG00000072135	87.6931967348697	-0.144749384783524	0.18049769413081	-0.801945894547672	0.422584256531176	0.520884748523069	protein tyrosine phosphatase, non-receptor type 18	PTPN18	19403	chr2
ENSG00000136002	1671.93283522686	-0.554365443901884	0.0689153458959015	-8.04415093177168	8.68454319656455e-16	7.73708826131593e-15	Rho guanine nucleotide exchange factor 4	ARHGEF4	116312	chr2
ENSG00000152102	7246.47889559808	-0.954377432626172	0.0373448906763436	-25.5557698882415	4.73691595607121e-144	3.35053070529178e-142	family with sequence similarity 168 member B	FAM168B	45556	chr2
ENSG00000115762	9046.07972585622	-0.13513732656581	0.0502924978890405	-2.68702753368826	0.00720910099338574	0.0154756988676222	pleckstrin homology domain containing B2	PLEKHB2	45006	chr2
ENSG00000152117	210.530511345657	0.107014153865777	0.136005892033811	0.786834689773392	0.431378643517839	0.529302427060394	sphingomyelin phosphodiesterase 4, neutral membrane (neutral sphingomyelinase-3) pseudogene	LOC150776	22935	chr2
ENSG00000163040	95.3094006759484	0.183592406521437	0.178924307112675	1.02608980011767	0.304849257671562	0.400282566443861	coiled-coil domain containing 74A	CCDC74A	5833	chr2
ENSG00000183840	34.0005536968225	1.25578448796885	0.261025058291968	4.8109729241558	1.50197365158187e-06	5.98439288489447e-06	G protein-coupled receptor 39	GPR39	230023	chr2
ENSG00000150551	579.513653646984	0.732887768771463	0.0867505504188796	8.44822038860475	2.95776643767105e-17	2.84697724808131e-16	LY6/PLAUR domain containing 1	LYPD1	26145	chr2
ENSG00000176771	707.596959727217	-0.117250710516343	0.0991709940078067	-1.18230851358728	0.237083308713457	0.325428965846512	NCK associated protein 5	NCKAP5	496872	chr2
ENSG00000152127	9198.77645615339	-0.656007635235834	0.0492692186641415	-13.3147562113316	1.89991601369104e-40	4.25053095395256e-39	mannosyl (alpha-1,6-)-glycoprotein beta-1,6-N-acetyl-glucosaminyltransferase	MGAT5	200363	chr2
ENSG00000152128	811.326220858862	-0.190875846493806	0.0734996773363047	-2.59696169304847	0.00940524124986029	0.0196832641518669	transmembrane protein 163	TMEM163	263242	chr2
ENSG00000082258	2489.28861948507	0.267282407892303	0.0485018252244237	5.51077009278632	3.57267127842079e-08	1.7030381638626e-07	cyclin T2	CCNT2	40524	chr2
ENSG00000115839	3957.84278468061	0.362315299786045	0.0448802798008115	8.07292872045538	6.8631677567893e-16	6.14176769545266e-15	RAB3 GTPase activating protein catalytic subunit 1	RAB3GAP1	118445	chr2
ENSG00000121988	616.485900289026	-0.219820047095119	0.0805397285005975	-2.72933682776802	0.00634618468927323	0.0138031241766224	zinc finger RANBP2-type containing 3	ZRANB3	330609	chr2
ENSG00000048991	447.248888324388	-0.400032330408237	0.117913369194827	-3.39259520052615	0.000692338690298371	0.00183918880076417	R3H domain containing 1	R3HDM1	138918	chr2
ENSG00000144224	5204.02369564471	-0.166818384776637	0.0482619285380794	-3.45652131669406	0.000547195926420877	0.00148459491466958	UBX domain protein 4	UBXN4	9012	chr2
ENSG00000076003	2696.92184865017	-0.516178649295027	0.0571104779877531	-9.03824775211508	1.59203210742363e-19	1.73918952140936e-18	minichromosome maintenance complex component 6	MCM6	36852	chr2
ENSG00000115866	4704.26672856748	0.0986813561615156	0.0434273809072354	2.27233036162847	0.0230665643179801	0.0439221255300219	aspartyl-tRNA synthetase	DARS	78969	chr2
ENSG00000121966	2607.87453173445	0.194256787697736	0.0575546464918074	3.37517124226256	0.000737697728794413	0.00194896372227235	C-X-C motif chemokine receptor 4	CXCR4	3807	chr2
ENSG00000150540	7431.10799832513	-0.0679067344804659	0.0460215874140312	-1.47554089930766	0.14006718096196	0.209450335932469	histamine N-methyltransferase	HNMT	52127	chr2
ENSG00000144228	691.358261357397	0.0685840312554983	0.0772950750544688	0.887301438120968	0.374916631523242	0.47235583163755	speckle type BTB/POZ protein like	SPOPL	71456	chr2
ENSG00000144227	22.3758622808152	0.388762698622086	0.284643536085284	1.36578790429868	0.172005543980369	0.248780093302186	neurexophilin 2	NXPH2	111085	chr2
ENSG00000168702	4835.21229420414	-0.893333575643256	0.0522504695856045	-17.0971396568918	1.55868741481336e-65	5.62613846506729e-64	LDL receptor related protein 1B	LRP1B	1900275	chr2
ENSG00000115919	9.33956609314112	2.37431179536494	0.354291099444273	6.70158465479147	2.06171357849205e-11	1.3083053315261e-10	kynureninase	KYNU	164691	chr2
ENSG00000121964	1199.71032909555	-0.289409301733331	0.0648264108612697	-4.46437336092344	8.03034279465182e-06	2.89112984162208e-05	glycosyltransferase like domain containing 1	GTDC1	386503	chr2
ENSG00000169554	3707.0027897698	0.32013333352219	0.0561660329403573	5.69976757771266	1.19970880563582e-08	5.99854402817908e-08	zinc finger E-box binding homeobox 2	ZEB2	93577	chr2
ENSG00000238057	16.1826924852063	0.820816005910948	0.315421608184516	2.60228210310432	0.00926056418935063	0.0194152996215353	ZEB2 antisense RNA 1	ZEB2-AS1	1285	chr2
ENSG00000121989	642.913118523707	-0.032942827999022	0.0895582964513279	-0.367836697484809	0.712995003833448	0.780360661823026	activin A receptor type 2A	ACVR2A	86308	chr2
ENSG00000115947	1927.39959253231	0.348728703463573	0.0548003233341908	6.36362492492805	1.97046984634344e-10	1.1609772906201e-09	origin recognition complex subunit 4	ORC4	90364	chr2
ENSG00000204406	723.762076475666	0.0910142382360569	0.0918942151172648	0.990424023099985	0.321966908214292	0.418318504982444	methyl-CpG binding domain protein 5	MBD5	30071	chr2
ENSG00000135999	2096.90472694044	0.192482148373401	0.0514309987563334	3.74253180042897	0.000182175469815929	0.000538149642432416	enhancer of polycomb homolog 2	EPC2	142577	chr2
ENSG00000168280	16652.0928557705	0.335154954091644	0.0559932926721767	5.98562681523074	2.15558093560926e-09	1.16200581228667e-08	kinesin family member 5C	KIF5C	78860	chr2
ENSG00000187123	453.96377301662	-0.931919364550008	0.112606584867	-8.27588693548159	1.27502941183378e-16	1.19124662526565e-15	LY6/PLAUR domain containing 6	LYPD6	143631	chr2
ENSG00000168288	2439.24280475386	0.223502363102104	0.0658320758493498	3.39503745276948	0.000686192130303422	0.00182424464405836	methylmalonic aciduria and homocystinuria, cblD type	MMADHC	18184	chr2
ENSG00000115963	6588.09205523227	1.10222706361035	0.0512757570619357	21.4960661093502	1.69458277366082e-102	8.59877961779704e-101	Rho family GTPase 3	RND3	19503	chr2
ENSG00000184898	562.202259228356	2.51702712107485	0.0940820737823378	26.7535250859593	1.12350970889598e-157	8.50527214761526e-156	RNA binding motif protein 43	RBM43	13662	chr2
ENSG00000123609	2876.37245820769	4.79863465769476	0.0711262431139211	67.4664434336691	0	0	N-myc and STAT interactor	NMI	19449	chr2
ENSG00000123610	821.779598353606	1.42584242454668	0.0900079606690736	15.8412924140008	1.61467748119129e-56	5.07030451212646e-55	TNF alpha induced protein 6	TNFAIP6	22457	chr2
ENSG00000080345	7023.14274954177	-0.159292277193614	0.054999483807951	-2.8962504039099	0.0037765092613953	0.00865913755825821	replication timing regulatory factor 1	RIF1	67461	chr2
ENSG00000183091	639.484085357088	0.0523929117267746	0.087854422421849	0.596360550584472	0.550934388492281	0.642213528062541	nebulin	NEB	98428	chr2
ENSG00000162980	4200.7837212651	-0.136927647742503	0.0455712903248801	-3.0046910404849	0.0026585074657421	0.00631057577249458	ADP ribosylation factor like GTPase 5A	ARL5A	27530	chr2
ENSG00000182389	1138.7688398423	-0.0751912280554125	0.07049732346407	-1.06658273478616	0.286160300271893	0.379838404445821	calcium voltage-gated channel auxiliary subunit beta 4	CACNB4	108185	chr2
ENSG00000115145	2944.05994501956	-0.0408224762491502	0.0509233906424948	-0.801644897052171	0.422758398810398	0.521007688783846	signal transducing adaptor molecule 2	STAM2	49989	chr2
ENSG00000157827	6613.27800197989	-0.0793714596347207	0.0387698451823539	-2.04724726811255	0.0406338125216249	0.0721811953786601	formin like 2	FMNL2	30326	chr2
ENSG00000196504	7310.81401271947	0.221896184045746	0.0453207768332139	4.89612490232354	9.77449528097137e-07	3.98520542678323e-06	pre-mRNA processing factor 40 homolog A	PRPF40A	44949	chr2
ENSG00000177917	1932.82030513433	0.0283877736986102	0.0566257730941257	0.501322492346777	0.616144178133676	0.698938863985269	ADP ribosylation factor like GTPase 6 interacting protein 6	ARL6IP6	41219	chr2
ENSG00000177519	135.626127283406	0.830692288288812	0.16147040381905	5.14454828031344	2.68165282508347e-07	1.16816633951148e-06	reprimo, TP53 dependent G2 arrest mediator candidate	RPRM	1471	chr2
ENSG00000144278	237.210771907328	0.410218697442847	0.123125007415086	3.33172526081478	0.000863094174888392	0.00225515558196118	polypeptide N-acetylgalactosaminyltransferase 13	GALNT13	208165	chr2
ENSG00000153234	58.7595670853675	0.542717341701606	0.206366818854849	2.6298672660324	0.00854182117590877	0.0180380285839268	nuclear receptor subfamily 4 group A member 2	NR4A2	5757	chr2
ENSG00000115159	7407.13952985095	-0.252585028494796	0.037630672340306	-6.71221141654314	1.91696670809618e-11	1.22198992930756e-10	glycerol-3-phosphate dehydrogenase 2	GPD2	150951	chr2
ENSG00000115170	605.945270837933	0.808917244381707	0.0860238138636465	9.40341061445956	5.28224731395831e-21	6.24813121891775e-20	activin A receptor type 1	ACVR1	138666	chr2
ENSG00000153237	91.6923055824557	0.0317461325239338	0.174667471780786	0.181751829349064	0.855777489369166	0.893748228084651	coiled-coil domain containing 148	CCDC148	118161	chr2
ENSG00000144283	2317.58689519274	-0.515220966757196	0.0502447658766782	-10.2542216640389	1.13284966246417e-24	1.56465084051388e-23	plakophilin 4	PKP4	205634	chr2
ENSG00000163331	68.4395186493504	-1.79380358727456	0.215222302306771	-8.33465476415976	7.77246463757051e-17	7.33019308075253e-16	death associated protein like 1	DAPL1	12024	chr2
ENSG00000115183	3145.71161178464	0.0401498239579368	0.0444839340455732	0.90256909195135	0.366754636631885	0.464202321376372	tetratricopeptide repeat, ankyrin repeat and coiled-coil containing 1	TANC1	14584	chr2
ENSG00000196151	250.389908372144	-0.185786748819101	0.11637497442007	-1.59644932035372	0.110388512144323	0.171281975690365	WD repeat, sterile alpha motif and U-box domain containing 1	WDSUB1	50933	chr2
ENSG00000123636	3000.75460286748	-0.190066958933777	0.0539449794511707	-3.52334843515548	0.000426130743405474	0.00117688050905022	bromodomain adjacent to zinc finger domain 2B	BAZ2B	182761	chr2
ENSG00000226266	38.033494236425	-0.0492117642851974	0.238210543677344	-0.20658936218984	0.836330568793193	0.878416800356132	bromodomain adjacent to zinc finger domain 2B	BAZ2B	182761	chr2
ENSG00000136536	6456.44068989345	0.113171290286923	0.0419415646410529	2.69830873634478	0.00696927728941903	0.0149953492761274	membrane associated ring-CH-type finger 7	MARCH7	34640	chr2
ENSG00000241399	661.924613514418	-0.498883656588472	0.100247154698475	-4.97653682130951	6.47319671973777e-07	2.692519158299e-06	CD302 molecule	CD302	29628	chr2
ENSG00000153246	25.6312648815731	-0.292128787048171	0.274015138695574	-1.06610455334265	0.286376381526231	0.380089198566609	phospholipase A2 receptor 1	PLA2R1	121867	chr2
ENSG00000136560	2719.65635714128	1.15341923691681	0.0531906675868584	21.6846166676386	2.86635086489214e-104	1.47585455377994e-102	TRAF family member associated NFKB activator	TANK	99218	chr2
ENSG00000115233	4446.50549294348	0.0496098811237148	0.0553284913820753	0.896642577530802	0.369909670693694	0.467519622603121	proteasome 26S subunit, non-ATPase 14	PSMD14	103443	chr2
ENSG00000144290	746.807379198987	-1.37321450794873	0.0914592052492689	-15.0145029601568	5.90024873058479e-51	1.65413691498383e-49	solute carrier family 4 member 10	SLC4A10	360942	chr2
ENSG00000197635	251.91944363149	0.555453779724272	0.116133732299789	4.7828806387658	1.72800745317875e-06	6.84007872758415e-06	dipeptidyl peptidase 4	DPP4	82298	chr2
ENSG00000078098	17.1333501606676	-0.000359085025459824	0.322271838293311	-0.00111423023296565	0.999110973083893	0.999467798431423	fibroblast activation protein alpha	FAP	72846	chr2
ENSG00000115267	15380.3009934038	5.67114865239364	0.0541335522363555	104.762174623836	0	0	interferon induced with helicase C domain 1	IFIH1	51630	chr2
ENSG00000115271	2230.77902385753	1.16744565304697	0.061302140461782	19.0441254457469	7.35034312682364e-81	3.05464556353606e-79	grancalcin	GCA	18566	chr2
ENSG00000184611	386.721367590848	0.158783542640994	0.0981962750421378	1.61700168945163	0.105877916228894	0.16541947978421	potassium voltage-gated channel subfamily H member 7	KCNH7	415501	chr2
ENSG00000182263	91.8503236031262	-0.43905838884012	0.177196144804941	-2.47781005237692	0.0132191498966999	0.0267380407717044	fidgetin, microtubule severing factor	FIGN	128396	chr2
ENSG00000115290	71.8051404271194	-0.528432629531391	0.201086778241142	-2.62788351453768	0.00859179312016536	0.0181298873961	growth factor receptor bound protein 14	GRB14	75695	chr2
ENSG00000082438	443.724885226938	-0.26843112516896	0.0986591811114237	-2.72079214671161	0.00651256966527403	0.0141189687557528	cordon-bleu WH2 repeat protein like 1	COBLL1	98687	chr2
ENSG00000153253	1875.42011521253	0.0615246817989819	0.0672229640854033	0.915233099820143	0.360069271503227	0.457269690551568	sodium voltage-gated channel alpha subunit 3	SCN3A	116548	chr2
ENSG00000136531	1263.42258449691	0.136979572711108	0.0675645402594145	2.027388511565	0.0426226959127547	0.0751991504482401	sodium voltage-gated channel alpha subunit 2	SCN2A	152909	chr2
ENSG00000178662	680.948204294741	-0.404859374741175	0.0902691904265925	-4.48502277275223	7.29061476655381e-06	2.6404204759655e-05	cysteine and serine rich nuclear protein 3	CSRNP3	117072	chr2
ENSG00000115339	14.6117995890133	0.614081357315504	0.319689520941414	1.92086795809626	0.0547483562248629	0.093483385629018	polypeptide N-acetylgalactosaminyltransferase 3	GALNT3	24634	chr2
ENSG00000123607	1689.39227341512	-0.245843486019753	0.0531312604437185	-4.62709681582226	3.7082719138518e-06	1.40287272159628e-05	tetratricopeptide repeat domain 21B	TTC21B	33513	chr2
[truncated: 12,007 more rows]

## Sheet: PE243V-vs-Control
ID	baseMean	log2FoldChange	lfcSE	stat	pvalue	padj	Description	Symbol	Gene_length	chr
ENSG00000228794	246.763857162101	-0.109442589393395	0.107517230147855	-1.01790744834937	0.308721941602989	0.458189059125971	long intergenic non-protein coding RNA 1128	LINC01128	31856	chr1
ENSG00000225880	15.8508168000499	0.0988756566215906	0.193998941475572	0.509671114025335	0.610281893287509	0.734911721717467	long intergenic non-protein coding RNA 115	LINC00115	1317	chr1
ENSG00000187634	19.6938506270669	0.281922181584656	0.194280170954617	1.45111145517013	0.14674882725355	0.263507804370486	sterile alpha motif domain containing 11	SAMD11	18232	chr1
ENSG00000188976	2914.10852966106	0.174881207029386	0.0640676357289453	2.72963415989417	0.00634046443690657	0.0201241452887486	NOC2 like nucleolar associated transcriptional repressor	NOC2L	1031	chr1
ENSG00000187961	314.132332766355	0.233352185368871	0.108655032773743	2.14764267620066	0.0317421524407514	0.0783391132868622	kelch like family member 17	KLHL17	1495	chr1
ENSG00000188290	729.560248202073	1.49336885422752	0.0822261012879965	18.1617373417354	1.03690748598705e-73	9.80648248740592e-72	hes family bHLH transcription factor 4	HES4	1211	chr1
ENSG00000187608	27556.9847764321	5.67040942763857	0.0594233493889777	95.4239282360337	0	0	ISG15 ubiquitin-like modifier	ISG15	1073	chr1
ENSG00000188157	10439.5755491139	1.49827825120983	0.0552006742221678	27.1423904204443	3.11386682156783e-162	4.3153261288599e-160	agrin	AGRN	35997	chr1
ENSG00000131591	300.428706345334	0.34819742569022	0.103823778550991	3.35373486257012	0.000797287193472915	0.00330264245251269	chromosome 1 open reading frame 159	C1orf159	34539	chr1
ENSG00000078808	4255.34694870911	0.343525364608199	0.0495961978802428	6.92644556015546	4.31545840116542e-12	7.07300600013026e-11	stromal cell derived factor 4	SDF4	15160	chr1
ENSG00000176022	1812.58352685735	-0.137412881636914	0.0592812228743913	-2.31798324957083	0.0204502314229229	0.0543462861641641	beta-1,3-galactosyltransferase 6	B3GALT6	2792	chr1
ENSG00000160087	1084.92808229626	0.191536772381599	0.0670720615519502	2.85568637596215	0.00429439100333449	0.0143525766174004	ubiquitin conjugating enzyme E2 J2	UBE2J2	19943	chr1
ENSG00000162572	148.596310059577	0.155668158367402	0.12889845912078	1.2076805217783	0.227170173124823	0.365657767892803	sodium channel epithelial 1 delta subunit	SCNN1D	9873	chr1
ENSG00000131584	1991.16949583238	-0.0481449630386521	0.0588848092483733	-0.817612617807404	0.4135784203646	0.56432610156398	ArfGAP with coiled-coil, ankyrin repeat and PH domains 3	ACAP3	13546	chr1
ENSG00000169972	386.830964754719	0.00174971396175362	0.0960088608328753	0.0182245049735501	0.985459753739372	0.990364799563583	pseudouridylate synthase-like 1	PUSL1	2592	chr1
ENSG00000127054	1768.76195882012	0.251230919604924	0.0577185628438332	4.35268841125982	1.34478214057924e-05	8.6146066918479e-05	cleavage and polyadenylation specific factor 3-like	CPSF3L	5866	chr1
ENSG00000224051	579.458992082623	0.276151046565194	0.0895311439149075	3.08441324984805	0.00203954080196165	0.00754294745087361	ceramide-1-phosphate transfer protein	CPTP	4134	chr1
ENSG00000107404	2330.39161754605	0.162089340344306	0.0638495383511343	2.53861413144307	0.0111292495967101	0.0325550901996136	dishevelled segment polarity protein 1	DVL1	4900	chr1
ENSG00000162576	38.8237837239809	-0.079577296566281	0.186593363896726	-0.426474419585066	0.669762183915572	0.780766326998106	matrix remodeling associated 8	MXRA8	5845	chr1
ENSG00000175756	1589.26571246696	0.140569049398096	0.0637130043016405	2.20628505811139	0.0273640469119736	0.0692111609372777	aurora kinase A interacting protein 1	AURKAIP1	1453	chr1
ENSG00000221978	2536.28389790323	0.109384140983295	0.0547490809175233	1.99791739240476	0.0457256167232001	0.105162907866354	cyclin L2	CCNL2	13628	chr1
ENSG00000224870	906.672119021325	-0.0634342189046953	0.0720018346025502	-0.881008369506859	0.378313290001835	0.531011945462865	uncharacterized LOC148413	LOC148413	2517	chr1
ENSG00000242485	1518.57673357359	0.120843738891433	0.0565556935995185	2.13672101251468	0.0326206899005639	0.0801319404243933	mitochondrial ribosomal protein L20	MRPL20	5418	chr1
ENSG00000179403	2636.82827388187	0.178434052837711	0.0689394597764531	2.58827170123339	0.009645886355546	0.0288120937512969	von Willebrand factor A domain containing 1	VWA1	7360	chr1
ENSG00000160072	1257.96310052912	0.166221377935312	0.068362064930719	2.43148562150321	0.0150370451437891	0.0420106828099035	ATPase family, AAA domain containing 3B	ATAD3B	23528	chr1
ENSG00000197785	1067.38935466684	0.166219612447229	0.0687680461851585	2.41710535151284	0.0156444884050594	0.0434389811953217	ATPase family, AAA domain containing 3A	ATAD3A	22158	chr1
ENSG00000205090	158.889461467171	0.0358637906390763	0.128952604691248	0.278116062292383	0.78092326603846	0.860586321742717	transmembrane protein 240	TMEM240	5583	chr1
ENSG00000160075	2436.13488016941	0.281042918916762	0.0496147294173167	5.66450572677459	1.47448938177663e-08	1.6237944828267e-07	SSU72 homolog, RNA polymerase II CTD phosphatase	SSU72	12531	chr1
ENSG00000228594	537.015793904388	-0.100037059562995	0.0868644615659928	-1.15164542276008	0.249466807916516	0.39145593166003	fibronectin type III domain containing 10	FNDC10	2089	chr1
ENSG00000197530	1113.83116276961	0.371289859576948	0.0718355683328658	5.16860753236468	2.35844576248413e-07	2.16324805619203e-06	mindbomb E3 ubiquitin protein ligase 2	MIB2	15196	chr1
ENSG00000248333	529.858593312068	0.143895393711333	0.10416125133799	1.38146759819936	0.167135233807663	0.29122268985508	cyclin dependent kinase 11B	CDK11B	84676	chr1
ENSG00000189339	2609.95071757055	-0.138811836815381	0.0555211315815745	-2.50016224203629	0.0124136441505625	0.035678393670518	solute carrier family 35 member E2B	SLC35E2B	7072	chr1
ENSG00000008128	14.7953912281008	-0.0442940487504366	0.192058069003584	-0.23062841868732	0.817603487789068	0.883024384149968	cyclin dependent kinase 11A	CDK11A	6222	chr1
ENSG00000215790	275.06288993867	-0.365806163322784	0.114322675429236	-3.19976909173379	0.00137537729404048	0.00533420780955515	solute carrier family 35 member E2	SLC35E2	18615	chr1
ENSG00000008130	2325.6843215009	0.103093441719081	0.053822824789898	1.91542235327698	0.0554386626862096	0.123131539450789	NAD kinase	NADK	7411	chr1
ENSG00000078369	14997.2082865831	0.0149984286342421	0.0372765136262263	0.402355992425477	0.687422052467466	0.793161855443667	G protein subunit beta 1	GNB1	105802	chr1
ENSG00000067606	432.255358377804	-0.175249452586541	0.0930718174210507	-1.8829486459228	0.0597073278034697	0.130274285072907	protein kinase C zeta	PRKCZ	80680	chr1
ENSG00000162585	738.490345142457	0.34225589214563	0.0721453923212285	4.74397437083342	2.09565374600997e-06	1.60904363592438e-05	Fanconi anemia core complex associated protein 20	FAAP20	10316	chr1
ENSG00000157933	777.310217161442	0.112906849823709	0.0872516806829833	1.29403638921227	0.19565285173243	0.327813378704671	SKI proto-oncogene	SKI	81519	chr1
ENSG00000116151	190.010766647357	0.0880318493003897	0.125298743302921	0.702575676178688	0.482320225383807	0.627507605427781	MORN repeat containing 1	MORN1	59429	chr1
ENSG00000269896	40.8616134728188	-0.0418952921375871	0.18105476083558	-0.231395694563553	0.817007409653832	0.882672403217833	small nuclear ribonucleoprotein polypeptide N pseudogene	LOC100129534	2248	chr1
ENSG00000157916	3479.89919717927	0.01473549559903	0.0482381255874324	0.305474050236916	0.760005130961948	0.846351485247386	retention in endoplasmic reticulum sorting receptor 1	RER1	13672	chr1
ENSG00000157911	2342.98652122019	0.310706354472531	0.0510488243410454	6.08645465362284	1.15438333005955e-09	1.46093159772546e-08	peroxisomal biogenesis factor 10	PEX10	7770	chr1
ENSG00000149527	16.9087792969365	0.11812766949293	0.194229827927387	0.60818500821147	0.54306477656297	0.680264692818318	phospholipase C eta 2	PLCH2	29211	chr1
ENSG00000157881	1079.2352748216	0.0507969919412747	0.0680234976048456	0.746756543398559	0.455210531611486	0.603655311318424	pantothenate kinase 4	PANK4	18061	chr1
ENSG00000197921	5725.32174581828	0.0850668673605138	0.0461336038171276	1.84392417504855	0.0651941913678922	0.139828853290896	hes family bHLH transcription factor 5	HES5	1501	chr1
ENSG00000157873	26.7846334421146	1.20341477676915	0.193906873188202	6.2061481214291	5.42990033436513e-10	7.17002971510459e-09	TNF receptor superfamily member 14	TNFRSF14	7463	chr1
ENSG00000157870	812.160639620811	-0.138028900587519	0.0831877176662833	-1.65924615387619	0.0970662007348476	0.19170814331673	family with sequence similarity 213 member B	FAM213B	4720	chr1
ENSG00000177133	103.049500051642	0.326101618350423	0.148262920756606	2.19948195196939	0.0278436710642225	0.0701201626279097	long intergenic non-protein coding RNA 982	LINC00982	4170	chr1
ENSG00000142611	376.566648505659	0.362082523291588	0.102051552194232	3.54803543411517	0.000388116003592651	0.00174958444518079	PR/SET domain 16	PRDM16	369444	chr1
ENSG00000130762	15.1122607998749	0.0997834394305364	0.193026309782841	0.516942169918677	0.605196528873805	0.730630546319491	Rho guanine nucleotide exchange factor 16	ARHGEF16	2851	chr1
ENSG00000162591	20.6463956302401	-0.000326477526457462	0.194239708372443	-0.00168079703780991	0.998658918625132	0.999658791675318	multiple EGF like domains 6	MEGF6	123554	chr1
ENSG00000158109	397.710913923012	-0.138875633105719	0.0964897078989391	-1.43927923640492	0.1500714232972	0.268200933591791	tumor protein p63 regulated 1 like	TPRG1L	5107	chr1
ENSG00000116213	643.177380481815	0.0397598999064548	0.0835748956935453	0.475739749077851	0.634259798886724	0.753691689024321	WD repeat containing, antisense to TP73	WRAP73	19341	chr1
ENSG00000078900	84.5149448868031	-0.188972894634455	0.154054602568074	-1.22666179058786	0.219949734485001	0.357440663367766	tumor protein p73	TP73	45530	chr1
ENSG00000227372	1671.45096361287	-0.0567536910331629	0.0526361317092137	-1.078226860338	0.280932527775305	0.428765956958995	TP73 antisense RNA 1	TP73-AS1	10788	chr1
ENSG00000130764	2268.08203429397	0.279635865655687	0.0509957138360983	5.48351703742092	4.16952100845318e-08	4.30389274006779e-07	leucine rich repeat containing 47	LRRC47	16285	chr1
ENSG00000116198	1203.67809672849	0.00488015818553583	0.0619786554952832	0.078739336091394	0.937239956916257	0.960784215391596	centrosomal protein 104	CEP104	45153	chr1
ENSG00000169598	353.435084309832	0.0439802147308777	0.0935448304909761	0.47015120450852	0.63824699324454	0.756695168934765	DNA fragmentation factor subunit beta	DFFB	28149	chr1
ENSG00000198912	778.824791548406	-0.0276458730889943	0.072976516993774	-0.37883245498484	0.704812284964747	0.80679427476325	chromosome 1 open reading frame 174	C1orf174	11161	chr1
ENSG00000196581	288.870584994393	0.0463429071287754	0.107357007758335	0.43167100216779	0.66598054592118	0.777977775100881	adherens junctions associated protein 1	AJAP1	128747	chr1
ENSG00000131697	388.786166955482	-0.0339764625021147	0.0972213708996778	-0.349475245902208	0.726732551617367	0.823116647110236	nephrocystin 4	NPHP4	115381	chr1
ENSG00000069424	107.958414826278	-0.0414501992128023	0.158521616586455	-0.261479791244724	0.793722531825123	0.869102266913576	potassium voltage-gated channel subfamily A regulatory beta subunit 2	KCNAB2	75181	chr1
ENSG00000116254	20.11959618256	-0.0624428285480495	0.194455259567165	-0.32111668610579	0.74812196571365	0.83765004032429	chromodomain helicase DNA binding protein 5	CHD5	78348	chr1
ENSG00000116251	6941.26803547739	-0.236514736662332	0.0387662643285162	-6.10104534855461	1.05377003225873e-09	1.33844093843244e-08	ribosomal protein L22	RPL22	14600	chr1
ENSG00000158286	50.0144257854815	-0.384778690232828	0.176522672756352	-2.17976922864705	0.0292745719713185	0.0731185196078775	ring finger protein 207	RNF207	2178	chr1
ENSG00000116237	4082.14961255328	-0.0944826218659055	0.0511705398708671	-1.84642612925992	0.064830356176744	0.139283268673198	isoprenylcysteine carboxyl methyltransferase	ICMT	14792	chr1
ENSG00000158292	408.645278135845	-0.351644701202608	0.0981928885022869	-3.58116261336398	0.000342068659451374	0.00156570798768505	G protein-coupled receptor 153	GPR153	13630	chr1
ENSG00000097021	784.820255375519	0.176275838287184	0.0716737378138309	2.45942019579127	0.0139161632923898	0.0392918705813404	acyl-CoA thioesterase 7	ACOT7	94673	chr1
ENSG00000187017	30.271785503338	0.100757901342937	0.190869361576235	0.527889340179377	0.597576143781993	0.724995517423642	espin	ESPN	12902	chr1
ENSG00000215788	65.0525531302192	0.353306040711093	0.164314045322121	2.15018770926413	0.031540369959563	0.0778745031441177	TNF receptor superfamily member 25	TNFRSF25	5042	chr1
ENSG00000171680	422.598701632663	0.640757886084339	0.0884418368400866	7.2449635712893	4.32555451433151e-13	7.83244327776173e-12	pleckstrin homology and RhoGEF domain containing G5	PLEKHG5	11567	chr1
ENSG00000162408	2356.05338387858	-0.0591119032201943	0.0472452091993537	-1.25117243043138	0.210871574421739	0.346835420350303	nucleolar protein 9	NOL9	33252	chr1
ENSG00000173662	8.35285482652948	-0.212463824352705	0.178411074884786	-1.19086679170511	0.233705883056932	0.37308180259442	taste 1 receptor member 1	TAS1R1	24480	chr1
ENSG00000204859	500.916581750478	0.0982723158698564	0.0865690287707357	1.13519023218009	0.256295621252336	0.399528879682475	zinc finger and BTB domain containing 48	ZBTB48	9278	chr1
ENSG00000162413	1863.97445800059	0.344012976907161	0.0533424831057797	6.44913691447346	1.12488907747001e-10	1.58097989984736e-09	kelch like family member 21	KLHL21	12151	chr1
ENSG00000116273	1315.60359042071	-0.175257068573438	0.0628950119353774	-2.7865018732091	0.00532803101533307	0.0172710630202911	PHD finger protein 13	PHF13	10338	chr1
ENSG00000041988	774.444769944262	0.28848194868163	0.0773536275964414	3.72939133749044	0.000191942856720993	0.000943337136770977	THAP domain containing 3	THAP3	10437	chr1
ENSG00000007923	2413.47463582929	0.158245776771375	0.0505832461460017	3.12842272547357	0.00175747216917751	0.00659499676996718	DnaJ heat shock protein family (Hsp40) member C11	DNAJC11	67739	chr1
ENSG00000171735	2007.38528234444	0.110704415779552	0.0513679520922489	2.1551261296293	0.0311519654960056	0.0771059347564263	calmodulin binding transcription activator 1	CAMTA1	102878	chr1
ENSG00000049245	2885.53440935615	0.0181585648513166	0.0443318795139563	0.409605120522806	0.682095640089396	0.789685084725498	vesicle associated membrane protein 3	VAMP3	10164	chr1
ENSG00000049246	1099.17575020376	-0.299208053655295	0.140053807487459	-2.13637928895355	0.0326485107995624	0.0801862091001009	period circadian clock 3	PER3	60524	chr1
ENSG00000049249	6.32287022492249	0.809107195008253	0.167123884936152	4.84136181562176	1.28952333319521e-06	1.02612041470912e-05	TNF receptor superfamily member 9	TNFRSF9	27295	chr1
ENSG00000116288	6199.44834620654	0.0340335457559097	0.0490991435565401	0.693159662076762	0.488209359502207	0.633080081985583	Parkinsonism associated deglycase	PARK7	23629	chr1
ENSG00000116285	1466.47127152116	0.117703833096585	0.057026684164523	2.06401327415438	0.0390164578317406	0.0925302203102123	ERBB receptor feedback inhibitor 1	ERRFI1	2266	chr1
ENSG00000162426	34.9766528287319	0.364855317413494	0.189900973850798	1.92129250321883	0.0546948417413477	0.121827450645074	solute carrier family 45 member 1	SLC45A1	14030	chr1
ENSG00000142599	1127.12739234814	-0.0213128497153537	0.060676809462231	-0.351251984147587	0.725399313793875	0.822405167274653	arginine-glutamic acid dipeptide repeats	RERE	288868	chr1
ENSG00000074800	35573.9820271542	0.00829755339460128	0.0499467913030549	0.166127856827787	0.868056332175307	0.916137727297398	enolase 1	ENO1	10577	chr1
ENSG00000142583	91.0381452343016	0.40585817534906	0.158691512860633	2.55752918371567	0.0105418711997269	0.0310445131880027	solute carrier family 2 member 5	SLC2A5	31004	chr1
ENSG00000180758	78.1024382651299	0.0974464824128637	0.159631280744789	0.610447288014037	0.541565551280809	0.678777175071342	G protein-coupled receptor 157	GPR157	24754	chr1
ENSG00000228526	313.65674696205	0.0203004903273669	0.108345401015768	0.187368269783896	0.851371899054797	0.90579602242855	microRNA 34a	MIR34A	110	chr1
ENSG00000049239	2339.43967124911	0.0247773681336909	0.0510042415078488	0.485790346080885	0.627115819688444	0.74835031334156	hexose-6-phosphate dehydrogenase/glucose 1-dehydrogenase	H6PD	36532	chr1
ENSG00000171621	243.95929500256	1.41265255975629	0.127764796091197	11.0566650828289	2.03524739305505e-28	8.50368888375867e-27	splA/ryanodine receptor domain and SOCS box containing 1	SPSB1	13825	chr1
ENSG00000171612	343.227327232945	0.12301917447569	0.100463810911094	1.22451232299517	0.220759020492138	0.358090625776852	solute carrier family 25 member 33	SLC25A33	43304	chr1
ENSG00000188807	1614.72936846958	0.215589533279156	0.0598497412189574	3.60217987393516	0.000315559884549867	0.00146254692186904	transmembrane protein 201	TMEM201	26004	chr1
ENSG00000171608	73.1913555981141	0.384035009674385	0.161112841782233	2.3836399719984	0.0171423639883891	0.0469645074859038	phosphatidylinositol-4,5-bisphosphate 3-kinase catalytic subunit delta	PIK3CD	37648	chr1
ENSG00000171603	9806.50688942949	0.0722180479173081	0.0423112284229451	1.70682938333562	0.0878537692770308	0.177418728692916	calsyntenin 1	CLSTN1	95472	chr1
ENSG00000178585	3863.43038607379	-0.161255477575186	0.0474789989162797	-3.39635378284892	0.00068290031905768	0.0028877811981421	catenin beta interacting protein 1	CTNNBIP1	61983	chr1
ENSG00000162441	2264.2739805395	-0.295815172683847	0.0554701237566932	-5.33287385442606	9.66704695715441e-08	9.47546612460016e-07	leucine zipper and CTNNBIP1 domain containing	LZIC	13065	chr1
ENSG00000173614	606.10844007649	-0.341988611546487	0.0777972220105447	-4.39589747176491	1.10315999043493e-05	7.21538803089612e-05	nicotinamide nucleotide adenylyltransferase 1	NMNAT1	42071	chr1
ENSG00000162444	11.7541532082163	-0.527962366241314	0.189005242276436	-2.79337419365926	0.00521613142263213	0.0169554555324157	retinol binding protein 7	RBP7	18824	chr1
ENSG00000130939	2050.66828882981	-0.30516218384485	0.0694293315299497	-4.39529197704017	1.10623958660056e-05	7.23215109465115e-05	ubiquitination factor E4B	UBE4B	148256	chr1
ENSG00000054523	22663.7635660048	-0.240946007162134	0.0456734356769332	-5.27540798258408	1.32461064044812e-07	1.26816519386815e-06	kinesin family member 1B	KIF1B	63706	chr1
ENSG00000142657	13514.4343637745	-0.0245628071310817	0.0474655714069527	-0.517486809976205	0.60481637414323	0.730298032167252	phosphogluconate dehydrogenase	PGD	21117	chr1
ENSG00000175279	51.9802769757602	-0.0119570969638943	0.175360325456098	-0.0681858734739164	0.945637672133207	0.966046525037563	centromere protein S	CENPS	12714	chr1
ENSG00000160049	3598.41899581645	-0.280122078234622	0.0424634114035161	-6.59678695083425	4.20163863001703e-11	6.16460544070738e-10	DNA fragmentation factor subunit alpha	DFFA	12011	chr1
ENSG00000142655	526.706611390572	0.447382117446139	0.0839278188843973	5.33055813189148	9.79113850131731e-08	9.59038247746245e-07	peroxisomal biogenesis factor 14	PEX14	45065	chr1
ENSG00000130940	22.6941870609641	0.222778619875842	0.193733561075781	1.14992270125412	0.25017570991998	0.392281839985081	castor zinc finger 1	CASZ1	3392	chr1
ENSG00000120948	905.028055153232	-0.340096430231224	0.162064349114068	-2.09852711031375	0.0358586076333988	0.0863431844219307	TAR DNA binding protein	TARDBP	12871	chr1
ENSG00000116649	926.780320361325	-0.00775144660310151	0.089291242244549	-0.0868108272239287	0.930821881236948	0.957008511214453	spermidine synthase	SRM	5443	chr1
ENSG00000171824	2604.87573316578	0.0342426293803059	0.0475465790124173	0.72019123334537	0.471407260811905	0.617817175054704	exosome component 10	EXOSC10	20171	chr1
ENSG00000198793	5524.1581438146	-0.140559163749578	0.0396206253101293	-3.54762608235876	0.000388719649203803	0.0017517414455588	mechanistic target of rapamycin	MTOR	25028	chr1
ENSG00000120942	698.507861897092	-0.0480752543775892	0.0798235000763415	-0.602269436088509	0.546994802183151	0.683963395225797	UbiA prenyltransferase domain containing 1	UBIAD1	15237	chr1
ENSG00000204624	703.018938798793	-0.277515803260253	0.081966592650816	-3.3857184285126	0.000709921856698448	0.00298133100156261	dispatched RND transporter family member 3	DISP3	25882	chr1
ENSG00000116661	168.798188549806	0.796624319351464	0.136172824242174	5.85009765189801	4.91284492806535e-09	5.72088938919557e-08	F-box protein 2	FBXO2	6471	chr1
ENSG00000132879	993.443478745408	0.446117206865779	0.0677593612546898	6.58384610783064	4.58431635532133e-11	6.69099854279799e-10	F-box protein 44	FBXO44	8471	chr1
ENSG00000116663	858.631561409396	1.12228957952665	0.0744933389015522	15.0656366874604	2.7252747776858e-51	1.91686789262654e-49	F-box protein 6	FBXO6	10260	chr1
ENSG00000116670	3322.70740914426	0.248250829074268	0.0556774027604381	4.45873580242978	8.24444653782218e-06	5.55864731165207e-05	MAD2 mitotic arrest deficient-like 2 (yeast)	MAD2L2	6959	chr1
ENSG00000162490	4914.81323752665	0.213715125581744	0.0455181348073551	4.69516438857266	2.66392404471761e-06	2.00575281624058e-05	dorsal inhibitory axon guidance protein	DRAXIN	28556	chr1
ENSG00000177674	2855.92736272417	1.59655523449162	0.0611327893411265	26.1161849753443	2.3878603299693e-150	3.15310198477173e-148	angiotensin II receptor associated protein	AGTRAP	14687	chr1
ENSG00000177000	2130.17721737992	0.354747693686864	0.0527903186677561	6.71993847810472	1.81801304400462e-11	2.77197479051555e-10	methylenetetrahydrofolate reductase	MTHFR	10761	chr1
ENSG00000011021	2879.06625187995	0.0239589590469408	0.128321925893362	0.186709783851367	0.851888184597211	0.906069826733068	chloride voltage-gated channel 6	CLCN6	10692	chr1
ENSG00000199347	84.8268176445057	-0.191402837658342	0.156698223828355	-1.22147420042235	0.221906528141245	0.359743534212765	RNA, U5E small nuclear 1	RNU5E-1	245257	chr5
ENSG00000116685	1314.94935033601	0.263258005488366	0.0644835484146228	4.08256077651997	4.45421581559522e-05	0.000253953803547398	KIAA2013	KIAA2013	4254	chr1
ENSG00000083444	3602.54936273686	0.240495440686615	0.0469416110417913	5.1232890254343	3.00251565522432e-07	2.70787446044941e-06	procollagen-lysine,2-oxoglutarate 5-dioxygenase 1	PLOD1	40876	chr1
ENSG00000116688	3836.07194047601	0.0903658714557618	0.0423765840310144	2.13244822635126	0.0329700163934875	0.0807774058217476	mitofusin 2	MFN2	33335	chr1
ENSG00000116691	1187.61252588592	0.236367588479213	0.0744189001745404	3.17617685728816	0.0014922994270832	0.00572777211574765	migration and invasion inhibitory protein	MIIP	12808	chr1
ENSG00000048707	4206.87398403377	-0.151718298948213	0.0511999550707833	-2.96325062665513	0.00304408604123104	0.0105753468153663	vacuolar protein sorting 13 homolog D	VPS13D	281986	chr1
ENSG00000162496	201.188129453011	1.04457978169858	0.121255352086187	8.61471072185008	7.01184086711386e-18	1.83448105826155e-16	dehydrogenase/reductase 3	DHRS3	37690	chr1
ENSG00000162493	3117.87371677361	0.282525763881503	0.055164366202026	5.12152650946484	3.0307212178151e-07	2.72979439419292e-06	podoplanin	PDPN	34201	chr1
ENSG00000116731	558.430631746345	-0.134417014479212	0.0878016256513201	-1.53091714967798	0.125789870160423	0.233853209275526	PR/SET domain 2	PRDM2	75719	chr1
ENSG00000189337	2619.67375529725	0.0528351853447016	0.0611048438598124	0.864664435865621	0.387222994725389	0.539031353274119	kazrin, periplakin interacting protein	KAZN	138356	chr1
ENSG00000175147	273.03691527573	-0.135207943169453	0.107512951776646	-1.25759679122514	0.208537614420948	0.344416678227686	TMEM51 antisense RNA 1	TMEM51-AS1	40650	chr1
ENSG00000171729	1230.64256761131	0.0120359462590291	0.0690412251433158	0.174329847624298	0.861606243367547	0.912730083131428	transmembrane protein 51	TMEM51	67947	chr1
ENSG00000142621	39.0183217375382	0.0534956896177387	0.187386954848594	0.285482464139312	0.775274537262917	0.856608596311102	forkhead associated phosphopeptide binding domain 1	FHAD1	42823	chr1
ENSG00000142634	2782.96342578208	-0.0715720754885843	0.0522507859657876	-1.36977988303272	0.170755623583242	0.295756590062102	EF-hand domain family member D2	EFHD2	20449	chr1
ENSG00000132906	285.380365585732	0.0568088348649624	0.101719434091361	0.558485557577313	0.57651286387997	0.70747418514185	caspase 9	CASP9	33617	chr1
ENSG00000116138	1086.9352835176	-0.0171857778812928	0.0654807638995888	-0.262455366398081	0.792970391956475	0.868833032227985	DnaJ heat shock protein family (Hsp40) member C16	DNAJC16	44877	chr1
ENSG00000116771	17.2444455641194	0.00975813113499775	0.194385444626226	0.0501999064475283	0.959963086105644	0.97404728441636	agmatinase	AGMAT	13412	chr1
ENSG00000197312	726.484801294535	0.00143636417716188	0.08032982163229	0.0178808336427889	0.985733919108096	0.990475065739844	DNA damage inducible 1 homolog 2	DDI2	16844	chr1
ENSG00000116786	4576.9914492692	0.16168308703711	0.0476483210463123	3.393258849141	0.000690663402857179	0.0029100588951812	pleckstrin homology and RUN domain containing M2	PLEKHM2	50438	chr1
ENSG00000162461	40.081065961736	0.189122697708342	0.184400843127887	1.02560646958203	0.305077116715256	0.454272808793983	solute carrier family 25 member 34	SLC25A34	5076	chr1
ENSG00000162458	349.616322362307	0.00277981431193568	0.105223485395499	0.0264181926828151	0.978923783551253	0.986317799047351	filamin binding LIM protein 1	FBLIM1	27830	chr1
ENSG00000233954	199.112833578792	-0.0116230692150874	0.120863899604585	-0.0961665911253328	0.92338826422399	0.952514226128911	ubiquinol-cytochrome c reductase hinge protein like	UQCRHL	538	chr1
ENSG00000179743	125.822023828013	-0.0903525370185896	0.13721947729853	-0.658452712380048	0.510247273299936	0.650686141069533	uncharacterized LOC729614	FLJ37453	13933	chr1
ENSG00000065526	1529.46265248454	0.221694583879961	0.068307824933125	3.24552251659317	0.00117235292874445	0.00464987926994506	spen family transcriptional repressor	SPEN	92592	chr1
ENSG00000116809	1507.97096368097	0.165029326423851	0.062751613412291	2.62988180621866	0.00854145586084445	0.0260503325463205	zinc finger and BTB domain containing 17	ZBTB17	34264	chr1
ENSG00000142627	4792.33634241386	0.184034910750163	0.0487828114363263	3.77253596772244	0.000161596662128981	0.000809611743699997	EPH receptor A2	EPHA2	31751	chr1
ENSG00000142632	47.9469853538249	0.695415262622766	0.182546547482595	3.80952295298311	0.00013923518087618	0.000711268184935728	Rho guanine nucleotide exchange factor 19	ARHGEF19	9107	chr1
ENSG00000132881	381.910782443391	-0.163760617714441	0.0913669938355048	-1.79233890533022	0.0730786948054461	0.153447718450619	REM2 and RAB like small GTPase 1	RSG1	5478	chr1
ENSG00000037637	1768.44413835716	0.0160463835252877	0.0514748216891245	0.311732668491748	0.755243698365168	0.842926883503489	F-box protein 42	FBXO42	102390	chr1
ENSG00000055070	4236.78744077687	0.220601117946192	0.0541172562093063	4.07635444585337	4.57472691527332e-05	0.000260188755112071	SUZ RNA binding domain containing 1	SZRD1	31119	chr1
ENSG00000187144	24.0155474421763	0.170728528127686	0.194033659320252	0.879891296828548	0.378918199915487	0.531398708335219	spermatogenesis associated 21	SPATA21	38782	chr1
ENSG00000157191	2344.61436855751	0.114623119230705	0.0490986072473571	2.33454930102676	0.0195669777133622	0.0524070009670743	NECAP endocytosis associated 2	NECAP2	19418	chr1
ENSG00000080947	149.984459773488	-0.0459648086229822	0.13174052595116	-0.348904092276226	0.727161312827253	0.82343828242351	ciliary rootlet coiled-coil, rootletin pseudogene 3	CROCCP3	25266	chr1
ENSG00000219481	1525.1530945919	-0.374113644352756	0.0607507781497575	-6.15817040944766	7.359014721814e-10	9.56398598525818e-09	neuroblastoma breakpoint family member 1	NBPF1	20854	chr1
ENSG00000058453	457.437989245419	0.276518112722306	0.107118068226352	2.58143296738691	0.00983910971195702	0.0292705671919793	ciliary rootlet coiled-coil, rootletin	CROCC	4777	chr1
ENSG00000117122	140.477747734541	0.171473271618732	0.137429729010352	1.24771599895839	0.212135080166461	0.348340534618719	microfibrillar associated protein 2	MFAP2	6175	chr1
ENSG00000159363	1762.12021887009	0.0237651725647548	0.0634213273945631	0.374718939843446	0.707869504969468	0.808886395710478	ATPase 13A2	ATP13A2	25971	chr1
ENSG00000117118	2908.69789562149	0.084113561610035	0.0525943613470427	1.59928858257283	0.109756495271411	0.210475635609527	succinate dehydrogenase complex iron sulfur subunit B	SDHB	35441	chr1
ENSG00000117115	19.3755409905723	-0.365138757418913	0.194384511353466	-1.87843545186041	0.0603216195108562	0.131289334208281	peptidyl arginine deiminase 2	PADI2	40423	chr1
ENSG00000179051	6446.11800554569	0.224803974493063	0.0366148214809676	6.13969877225581	8.26781099951922e-10	1.06756965461504e-08	regulator of chromosome condensation 2	RCC2	33000	chr1
ENSG00000074964	2681.63988132445	0.386053336773047	0.0565931350837867	6.82155770662805	9.00585786686984e-12	1.4259614543278e-10	Rho guanine nucleotide exchange factor 10 like	ARHGEF10L	79560	chr1
ENSG00000117154	10.8356718643892	-0.285397780809341	0.188051658081192	-1.51765628509438	0.129101069728109	0.238551507984732	immunoglobin superfamily member 21	IGSF21	17117	chr1
ENSG00000159423	1433.99202142247	0.120653035726875	0.0573449155658033	2.10398837519302	0.0353794610617751	0.0854378939379124	aldehyde dehydrogenase 4 family member A1	ALDH4A1	31370	chr1
ENSG00000169991	803.352874109971	-0.0603210697918579	0.071106416129393	-0.848321052801917	0.396259196075969	0.548175525546089	intermediate filament family orphan 2	IFFO2	52053	chr1
ENSG00000127481	7154.57944250004	-0.223106337185784	0.0987423528761704	-2.25947965272383	0.0238535645949616	0.0618064316245238	ubiquitin protein ligase E3 component n-recognin 4	UBR4	31337	chr1
ENSG00000127463	6188.80353691245	0.0400630831917731	0.0389855607438656	1.0276390137104	0.304119665200568	0.453184600640089	ER membrane protein complex subunit 1	EMC1	35896	chr1
ENSG00000053372	2543.65561603588	0.0311321423687941	0.0645744803384898	0.482112162662464	0.62972627016121	0.750406828149707	MRT4 homolog, ribosome maturation factor	MRTO4	8548	chr1
ENSG00000211454	14.5632569656379	0.264860901638289	0.192207606149399	1.37799386270082	0.168205183022851	0.292540748853237	aldo-keto reductase family 7 like (gene/pseudogene)	AKR7L	8093	chr1
ENSG00000162482	14.683665346608	-0.148097280724284	0.193413959978059	-0.76570109386667	0.443854176055185	0.593034259473504	aldo-keto reductase family 7 member A3	AKR7A3	6224	chr1
ENSG00000053371	1824.55596887519	-0.0706604633937823	0.0588686986663149	-1.20030618978528	0.230020446716079	0.368796814740544	aldo-keto reductase family 7 member A2	AKR7A2	4408	chr1
ENSG00000040487	1137.15994888425	0.218969204420645	0.0640629634109823	3.41803114876055	0.000630758877708181	0.00269826772960923	PQ loop repeat containing 2	PQLC2	17055	chr1
ENSG00000077549	5187.62489485499	-0.154662106699182	0.0398662611609905	-3.87952374251038	0.000104661185506041	0.000550730305837615	capping actin protein of muscle Z-line beta subunit	CAPZB	146800	chr1
ENSG00000173436	239.469688731344	-0.253746933204399	0.113171350392434	-2.24214814371751	0.0249517993362653	0.0641414757226274	mitochondrial inner membrane organizing system 1	MINOS1	32845	chr1
ENSG00000158747	589.751821506854	-0.0985626749002654	0.0806233869578075	-1.22250724782681	0.221515864724499	0.359155750671943	neuroblastoma 1, DAN family BMP antagonist	NBL1	14742	chr1
ENSG00000162542	67.3979694892508	0.188440319308958	0.170931979186841	1.10242869827757	0.270275340778033	0.416039144932379	transmembrane and coiled-coil domains 4	TMCO4	54734	chr1
ENSG00000169914	888.821069622474	-0.265098597911947	0.0658434847501922	-4.02619331157398	5.66870914199772e-05	0.000316619799922355	OTU deubiquitinase 3	OTUD3	30550	chr1
ENSG00000127472	260.62411977786	0.528003161178503	0.128391295950886	4.112452929679	3.91477305634045e-05	0.000226145598306221	phospholipase A2 group V	PLA2G5	21694	chr1
ENSG00000162543	46.7444828741278	0.534240926073724	0.180337896376246	2.96244403871229	0.00305207283687896	0.0106004624064007	UBX domain protein 10	UBXN10	7365	chr1
ENSG00000162545	254.739739450815	0.108395844287205	0.113538758157184	0.95470345146052	0.339727683964761	0.491287156984684	calcium/calmodulin dependent protein kinase II inhibitor 1	CAMK2N1	3845	chr1
ENSG00000090432	2005.94788731097	0.0969061523815865	0.0509378575492852	1.90243871736899	0.0571138234053835	0.126111718915468	mitochondrial E3 ubiquitin protein ligase 1	MUL1	8734	chr1
ENSG00000183114	29.7626697479239	0.16614972867173	0.191410133845638	0.868029948747231	0.385377937729987	0.537210934608767	family with sequence similarity 43 member B	FAM43B	2582	chr1
ENSG00000158828	4032.16432006787	-0.0239016070388272	0.0457640575577762	-0.52227901795316	0.601476075932284	0.72751993042034	PTEN induced putative kinase 1	PINK1	18057	chr1
ENSG00000244038	7650.87542315838	0.14843166412702	0.0540333674748329	2.74703708215401	0.00601363348161128	0.0192219291715262	dolichyl-diphosphooligosaccharide--protein glycosyltransferase non-catalytic subunit	DDOST	9778	chr1
ENSG00000117245	21.9630810717943	0.0612637823488434	0.194443249737918	0.315072816523167	0.752706367430437	0.84110099193069	kinesin family member 17	KIF17	21175	chr1
ENSG00000189410	105.315762315107	0.631475995135724	0.163626207269426	3.8592595017248	0.000113731119676039	0.00059244305251415	SH2 domain containing 5	SH2D5	12909	chr1
ENSG00000127483	11148.7878303536	-0.079378649574564	0.0390740645327554	-2.03149200176044	0.0422051100779606	0.0987822202271739	heterochromatin protein 1 binding protein 3	HP1BP3	43954	chr1
ENSG00000075151	6729.32449732796	-0.285287685689194	0.0583750786594905	-4.88714862986848	1.02306859463875e-06	8.30620134521963e-06	eukaryotic translation initiation factor 4 gamma 3	EIF4G3	244703	chr1
ENSG00000117298	1154.19501984976	0.213288112048042	0.0652192435625582	3.27032483661753	0.00107424048700151	0.0042961994949661	endothelin converting enzyme 1	ECE1	62444	chr1
ENSG00000142794	824.082888560509	-0.120545071992474	0.0678881100981728	-1.77564336108568	0.0757917182811999	0.157865577497315	neuroblastoma breakpoint family member 3	NBPF3	44811	chr1
ENSG00000162551	968.516366374246	-0.220462279081945	0.0726155097567263	-3.03602191626182	0.00239721939001105	0.00864790716545997	alkaline phosphatase, liver/bone/kidney	ALPL	69048	chr1
ENSG00000076864	1731.58522951382	-0.0329821569361387	0.0606769942463333	-0.543569393075726	0.58673782646941	0.716254086611925	RAP1 GTPase activating protein	RAP1GAP	23836	chr1
ENSG00000090686	1736.02143358461	-0.149552477658223	0.0549583570879599	-2.72119629447559	0.00650461240717811	0.0205705060694243	ubiquitin specific peptidase 48	USP48	104897	chr1
ENSG00000142798	568.034473464459	0.226695990583568	0.0894056857544001	2.53558807441294	0.0112258695677498	0.0327837762312796	heparan sulfate proteoglycan 2	HSPG2	8470	chr1
ENSG00000218510	260.639793680727	-0.00807294776766647	0.105477772818755	-0.0765369570472296	0.938991912718858	0.961875717383332	long intergenic non-protein coding RNA 339	LINC00339	5674	chr1
ENSG00000070831	15332.8355495415	-0.032909818471535	0.0373372706340255	-0.881420037209259	0.378090516429257	0.530752478032325	cell division cycle 42	CDC42	40317	chr1
ENSG00000184677	2019.85624447776	-0.105258943152022	0.0530913275052074	-1.98260145485527	0.0474119647478708	0.108329296535414	zinc finger and BTB domain containing 40	ZBTB40	79307	chr1
ENSG00000133216	1095.30903404053	-0.106723182244216	0.0635176737690003	-1.68021238674994	0.0929160001690661	0.185474223383688	EPH receptor B2	EPHB2	204493	chr1
ENSG00000004487	6367.3528398621	-0.139807726095033	0.0361355300602502	-3.86898229697825	0.000109290576118922	0.000572293375958308	lysine demethylase 1A	KDM1A	64244	chr1
ENSG00000169641	1034.00876645892	0.0547676048123752	0.0703893348739134	0.778066803877022	0.43652963149311	0.586657306589024	leucine zipper protein 1	LUZP1	86619	chr1
ENSG00000179546	20.1341203392861	-0.733434023585884	0.194415118376066	-3.77251537695319	0.000161610002993341	0.000809611743699997	5-hydroxytryptamine receptor 1D	HTR1D	2835	chr1
ENSG00000125944	10549.8241371065	-0.140409300705233	0.0383822893251412	-3.65817941488086	0.000254013212139647	0.00120809477754626	heterogeneous nuclear ribonucleoprotein R	HNRNPR	34578	chr1
ENSG00000125945	3372.01605101005	0.228734452391982	0.0540917878062772	4.22863546701701	2.35112933672097e-05	0.000142277377112337	zinc finger protein 436	ZNF436	10417	chr1
ENSG00000249087	95.1660863501331	-0.358232229408336	0.158286655086028	-2.26318655362095	0.0236241917623515	0.0613028943451306	ZNF436 antisense RNA 1	ZNF436-AS1	2620	chr1
ENSG00000204219	22.0383154834967	0.0901964320177898	0.194037385135719	0.464840483985611	0.642045693858583	0.75959036234795	transcription elongation factor A3	TCEA3	16105	chr1
ENSG00000088280	1746.48222631043	0.301754432859578	0.0670605117119548	4.49973352657529	6.80386984325315e-06	4.68439577943996e-05	ArfGAP with SH3 domain, ankyrin repeat and PH domain 3	ASAP3	55695	chr1
ENSG00000007968	670.945268514547	-0.105759279896169	0.0735813786555348	-1.43731038788051	0.150629818512104	0.268787043563734	E2F transcription factor 2	E2F2	24793	chr1
ENSG00000117318	1415.30157158377	0.105429888801815	0.0728221018998288	1.4477732179008	0.147680485256792	0.264842590636706	inhibitor of DNA binding 3, HLH protein	ID3	1865	chr1
ENSG00000142676	15375.8908488346	-0.0141052815459274	0.0333547790688812	-0.422886373098095	0.672378165485694	0.782586657528795	ribosomal protein L11	RPL11	4647	chr1
ENSG00000011007	3049.04357328604	-0.00450898249395935	0.0432880219670319	-0.104162359217832	0.917040504428977	0.948132363753316	transcription elongation factor B subunit 3	TCEB3	18694	chr1
ENSG00000236810	91.5237759127598	-0.0251266239857205	0.15249989932843	-0.164764856215457	0.869129066599841	0.916951801100322	TCEB3 antisense RNA 1	TCEB3-AS1	17916	chr1
ENSG00000057757	2009.14534953494	-0.147020213239	0.0585382280019077	-2.51152483184507	0.01202108282306	0.0347355690079212	PITH domain containing 1	PITHD1	9847	chr1
ENSG00000011009	1192.52545654328	0.112442269104075	0.0587320638412143	1.91449545188927	0.0555568797106703	0.123354956426119	lysophospholipase II	LYPLA2	4384	chr1
ENSG00000117308	1251.3839010351	0.112937154194406	0.0697142629368615	1.62000069191997	0.105232128275772	0.204177169320208	UDP-galactose-4-epimerase	GALE	3972	chr1
ENSG00000117305	1357.38131671799	0.00791528901110602	0.0575898081949834	0.137442531225438	0.890681014956206	0.930432283479514	3-hydroxymethyl-3-methylglutaryl-CoA lyase	HMGCL	13184	chr1
ENSG00000179163	426.919454369897	-0.071227260102273	0.0901582947743224	-0.790024481724769	0.429513470953212	0.579950583981946	fucosidase, alpha-L- 1, tissue	FUCA1	23288	chr1
ENSG00000189266	4694.94337367481	0.00240970842050134	0.0403124743212265	0.0597757508333471	0.952334239064467	0.969899248486113	proline rich nuclear receptor coactivator 2	PNRC2	3649	chr1
ENSG00000188529	5069.25774775759	0.0125012913553974	0.0418043717738461	0.299042679627554	0.764907481029925	0.849041238063113	serine and arginine rich splicing factor 10	SRSF10	14009	chr1_gl000191_random
ENSG00000158055	38.664808686116	0.116262953149484	0.18423605381636	0.631054295514659	0.528005023728913	0.667312534278429	grainyhead like transcription factor 3	GRHL3	35997	chr1
ENSG00000001460	36.9504841182456	0.156961480670486	0.183507641813842	0.855340296017287	0.392362785581512	0.544075877727801	sperm tail PG-rich repeat containing 1	STPG1	58099	chr1
ENSG00000001461	895.004646736602	0.193997673943358	0.0782313064106056	2.47979591348174	0.0131457600730522	0.0374138275198276	NIPA like domain containing 3	NIPAL3	57229	chr1
ENSG00000117602	155.286847813862	-0.430169427885173	0.138891908338929	-3.09715254855206	0.00195389297120495	0.00727078448952476	RCAN family member 3	RCAN3	34124	chr1
ENSG00000133226	778.144487508177	-0.205948724642186	0.157129597178416	-1.31069339157242	0.189961372234938	0.320571137734145	serine and arginine repetitive matrix 1	SRRM1	30179	chr1
ENSG00000169504	6551.35202718972	-6.22002519898728e-05	0.0365048628937585	-0.00170388948373526	0.998640493545442	0.999658791675318	chloride intracellular channel 4	CLIC4	99056	chr1
ENSG00000117614	991.397124181817	0.0164060138641139	0.0676899486583423	0.242370014888347	0.808493466462472	0.877581186986318	SYF2 pre-mRNA splicing factor	SYF2	5730	chr1
ENSG00000117616	1099.2295118717	-0.401245468277587	0.0663913268311142	-6.04364285862628	1.50672840488301e-09	1.87965039956752e-08	arginine and serine rich protein 1	RSRP1	95917	chr1
ENSG00000183726	4954.55529809785	0.44832715085683	0.0410566556407428	10.9197191992406	9.27822106757952e-28	3.77521105473577e-26	transmembrane protein 50A	TMEM50A	24064	chr1
ENSG00000188672	10.9037393718806	0.182871839707198	0.188870029444063	0.968241706984844	0.332923669976535	0.484091346336665	Rh blood group CcEe antigens	RHCE	58624	chr1
ENSG00000204178	798.057875391475	-0.0488870046250367	0.071161202652003	-0.686989578634681	0.492089295613422	0.636636830640639	transmembrane protein 57	TMEM57	69311	chr1
ENSG00000157978	110.208015377612	0.121573866697518	0.145769529876319	0.834014260735214	0.404272947821126	0.555200986131506	low density lipoprotein receptor adaptor protein 1	LDLRAP1	25302	chr1
ENSG00000117643	1788.73063684486	0.158384771525344	0.059911092651628	2.64366354401717	0.0082014134553659	0.0251739944625534	mannosidase alpha class 1C member 1	MAN1C1	167300	chr1
[truncated: 13,765 more rows]
